# Supplementary material for: Polygenic scores stratify neurodevelopmental copy number variant carrier cognitive outcomes in the UK Biobank
Source: Springer Nature journal article supplement (doi:10.1038/s41525-024-00426-8), 2024-09-28
Supplement: MOESM1 [file 41525_2024_426_MOESM1_ESM.pdf]

# 1 Supplementary Information

---

2

## 3 Table of contents

4 1. List of excluded medical conditions.

5 2. Description of variables used for linear regression analyses.

6 3. Supplementary tables 1-20

7 4. Supplementary figures 1-15

8 5. References

9

## 10 1. List of excluded medical conditions from present study

11

| ICD-10 code | Medical condition name |
|-------------|------------------------|
|-------------|------------------------|

---

|     |                                 |
|-----|---------------------------------|
| F00 | Dementia in Alzheimer's Disease |
|-----|---------------------------------|

|     |                   |
|-----|-------------------|
| F01 | Vascular Dementia |
|-----|-------------------|

|     |                                                 |
|-----|-------------------------------------------------|
| F02 | Dementia in other diseases classified elsewhere |
|-----|-------------------------------------------------|

|     |                        |
|-----|------------------------|
| F03 | Dementia (unspecified) |
|-----|------------------------|

|     |                                                          |
|-----|----------------------------------------------------------|
| F04 | Organic amnesic syndrome (non-alcohol/substance related) |
|-----|----------------------------------------------------------|

|     |                                          |
|-----|------------------------------------------|
| F05 | Delirium (non-alcohol/substance related) |
|-----|------------------------------------------|

|     |                                                                                    |
|-----|------------------------------------------------------------------------------------|
| F06 | Other mental disorders due to brain damage and dysfunction and to physical disease |
|-----|------------------------------------------------------------------------------------|

|     |                                                                                     |
|-----|-------------------------------------------------------------------------------------|
| F07 | Personality and behavioural disorders due to brain disease, damage, and dysfunction |
|-----|-------------------------------------------------------------------------------------|

|     |                                                      |
|-----|------------------------------------------------------|
| F09 | Organic or symptomatic mental disorder (unspecified) |
|-----|------------------------------------------------------|

|     |                                                                      |
|-----|----------------------------------------------------------------------|
| R41 | Other symptoms and signs involving cognitive functions and awareness |
|-----|----------------------------------------------------------------------|

|     |                     |
|-----|---------------------|
| S06 | Intracranial injury |
|-----|---------------------|

|       |                               |
|-------|-------------------------------|
| S09.7 | Multiple injuries of the head |
|-------|-------------------------------|

12

## 13 2. Description of variables used for linear regression analyses

### 14 - Fluid Intelligence score (UKB Field 20016)

15 Fluid intelligence (FI) was assessed via a fully-automated, 2-minute touch-screen test  
16 which consisted of 13 verbal and numeric questions (UKB Field 20016)  
17 [<https://biobank.ndph.ox.ac.uk/showcase/showcase/docs/Fluidintelligence.pdf>].

18 Participants who attempted the test were given an ordinal score of 0-13  
19 corresponding with the total number of correct answers achieved. Participants who  
20 failed to finish the test within the allotted time were given zero for each unanswered  
21 question. Participants ( $n= 205,328$ ) attempted the touch-screen test at one of four  
22 assessment centre visits. Some individuals had multiple attempts at the FI test, thus,  
23 for these participants we included their first attempt as their FI score, similar to  
24 previous studies<sup>1,2</sup>. An additional 123,594 participants were administered the test in  
25 online format (UKB Field 200191). We did not include these scores given that the two  
26 modalities, online and in-person touch screen FI test, may not be directly comparable<sup>3</sup>.  
27 FI scores were converted to z-scores by normalising to the cohort mean.

28

### 29 - Townsend Deprivation index score (UKB Field 189)

30 The Townsend Deprivation Index (TDI) is a socio-demographic measure of material  
31 deprivation within a population<sup>4</sup>. TDI scores were calculated before the participant  
32 joined the UKB based on national census output areas ( $n= 501,901$ ). Scores were  
33 assigned to participants based on the output area in which their postcode was located  
34 in. It is a broad measure based on four categories: unemployment (economically  
35 active residents >16yrs), non-car ownership, non-home ownership and household-

36 overcrowding (persons per room, occupancy rating). A combined, standardised  
37 measure (z-score) of all four categories outputs a TDI score for that area. A positive  
38 TDI score indicates greater deprivation whereas a negative TDI score indicates lesser  
39 deprivation.

40

41 - **Educational attainment (UKB Field 6138)**

42 Educational attainment ( $n = 498,765$ ) was collected as a touch-screen questionnaire  
43 during assessment centres visits where participants were asked “which of the  
44 following qualifications do you have?”. Participants had a choice of 8 categories. We  
45 re-coded these categories to reflect the level of educational attainment of each  
46 participant:

- 47 ▪ 0 = None of the above; Prefer not to answer.
- 48 ▪ 1 = A levels/AS levels; CSEs or equivalent; O levels/GCSEs or equivalent
- 49 ▪ 2 = NVQ or HND or HNC or equivalent; Other professional qualifications e.g.:  
50 nursing, teaching.
- 51 ▪ 3 = College or University degree.

52

53 - **Employment status (UKB Field 6142)**

54 Employment status ( $n = 501,559$ ) was collected as a touch-screen questionnaire  
55 during assessment centres visits where participants were asked “Which of the  
56 following describes your current situation? (You can select more than one answer)”.  
57 Participants had a choice of 9 categories (described in Supplementary Table 2). We  
58 decided not to recode this variable.

59

60 - Other variables used as predictors which are standard in genetic association analyses  
61 and are self-explanatory, were sex, age at time of assessment, batch and array type  
62 (for PGS models only), assessment centre location, and ancestry principal  
63 components.

64 All analyses were tested for multi-collinearity using variance inflation factors (VIFs), condition  
65 indices, and pairwise correlations to ensure only reliable and interpretable predictors would  
66 be retained. However, to investigate the effect of correcting linear regression models for  
67 educational attainment, we re-ran the analyses omitting the educational attainment  
68 covariate (*Supplementary Tables 10. and 15.*).

69

70

71 **3. Supplementary Tables 1-20.**

| Supplementary Table 1   Demographics of excluded UKB participants who attempted the fluid intelligence (FI) test |              |              |               |              |              |              |              |              |                     |              |              |
|------------------------------------------------------------------------------------------------------------------|--------------|--------------|---------------|--------------|--------------|--------------|--------------|--------------|---------------------|--------------|--------------|
| Variable                                                                                                         | All ND-CNVs  | 15q11.2 del. | 16p13.11 dup. | 22q11.2 dup. | 1q21.1 dup.  | 16p12.1 del. | NRXN1 del.   | 16p11.2 dup. | 16p11.2 distal dup. | 1q21.1 del.  | Non-carriers |
| n max.                                                                                                           | 296          | 119          | 58            | 19           | 13           | 17           | 9            | 8            | 10                  | 7            | 51,389       |
| Sex (%male)                                                                                                      | 48           | 47           | 48            | 58           | 15           | 82           | 67           | 50           | 20                  | 71           | 39           |
| Age (years)                                                                                                      | 56.38 [8.72] | 57.54 [8.38] | 57.76 [9.00]  | 54.11 [9.42] | 54.31 [8.46] | 51.59 [8.05] | 58.56 [8.28] | 59.00 [8.31] | 54.80 [8.35]        | 56.14 [9.21] | 56.30 [8.79] |
| TDI score (z)                                                                                                    | 0.99 [0.12]  | 0.97 [0.16]  | -0.74 [3.56]  | 1.50 [3.36]  | 1.30 [3.57]  | 0.99 [4.37]  | -1.79 [2.05] | 0.88 [3.52]  | 0.08 [3.68]         | -0.31 [2.99] | -0.53 [0.08] |
| FI score (z)                                                                                                     | -0.16 [0.96] | -0.25 [0.86] | -0.29 [1.04]  | 0.06 [1.00]  | 0.03 [1.26]  | -0.58 [0.98] | -0.38 [0.98] | 0.55 [0.92]  | -0.02 [0.53]        | -0.57 [0.85] | 0.001 [1.00] |
| <b>Ethnicity</b>                                                                                                 |              |              |               |              |              |              |              |              |                     |              |              |
| - British                                                                                                        | 157          | 68           | 30            | 10           | 2            | 8            | 3            | 7            | 4                   | 4            | 24,289       |
| - Any other white background                                                                                     | 38           | 16           | 6             | 3            | 2            | 4            | 3            | 0            | 1                   | 1            | 7,299        |
| - Irish                                                                                                          | 38           | 16           | 7             | 2            | 0            | 4            | 3            | 0            | 2                   | 0            | 5,737        |
| - Indian                                                                                                         | 14           | 6            | 3             | 0            | 1            | 0            | 0            | 0            | 1                   | 0            | 3,252        |
| - Caribbean                                                                                                      | 12           | 3            | 2             | 1            | 2            | 0            | 0            | 0            | 1                   | 1            | 2,522        |
| - Other ethnic group                                                                                             | 4            | 1            | 2             | 1            | 0            | 0            | 0            | 0            | 0                   | 0            | 2,040        |
| - African                                                                                                        | 4            | 2            | 1             | 0            | 1            | 0            | 0            | 0            | 0                   | 0            | 1,523        |
| - Any other Asian background                                                                                     | 5            | 0            | 2             | 1            | 1            | 0            | 0            | 0            | 0                   | 0            | 921          |
| - Chinese                                                                                                        | 2            | 0            | 0             | 0            | 0            | 0            | 0            | 1            | 0                   | 0            | 691          |
| - Pakistani                                                                                                      | 0            | 0            | 0             | 0            | 0            | 0            | 0            | 0            | 0                   | 0            | 648          |
| - Any other mixed background                                                                                     | 3            | 1            | 0             | 1            | 1            | 0            | 0            | 0            | 0                   | 0            | 471          |
| - White and Asian                                                                                                | 2            | 1            | 0             | 0            | 0            | 0            | 0            | 0            | 0                   | 1            | 417          |
| - White and Black Caribbean                                                                                      | 2            | 1            | 1             | 0            | 0            | 0            | 0            | 0            | 0                   | 0            | 305          |
| - White and Black African                                                                                        | 0            | 0            | 0             | 0            | 0            | 0            | 0            | 0            | 0                   | 0            | 174          |
| - White                                                                                                          | 3            | 0            | 2             | 0            | 0            | 0            | 0            | 0            | 0                   | 0            | 172          |
| - Bangladeshi                                                                                                    | 1            | 1            | 0             | 0            | 0            | 0            | 0            | 0            | 0                   | 0            | 66           |
| - Any other Black background                                                                                     | 0            | 0            | 0             | 0            | 0            | 0            | 0            | 0            | 0                   | 0            | 63           |
| - Asian or Asian British                                                                                         | 0            | 0            | 0             | 0            | 0            | 0            | 0            | 0            | 0                   | 0            | 21           |
| - Mixed                                                                                                          | 0            | 0            | 0             | 0            | 0            | 0            | 0            | 0            | 0                   | 0            | 16           |
| - Black or Black British                                                                                         | 0            | 0            | 0             | 0            | 0            | 0            | 0            | 0            | 0                   | 0            | 12           |
| - Prefer not to answer                                                                                           | 11           | 3            | 2             | 0            | 3            | 1            | 0            | 0            | 1                   | 0            | 669          |
| - Do not know                                                                                                    | 0            | 0            | 0             | 0            | 0            | 0            | 0            | 0            | 0                   | 0            | 65           |
| - NA's                                                                                                           | 0            | 0            | 0             | 0            | 0            | 0            | 0            | 0            | 0                   | 0            | 16           |

72

73 **Supplementary Table 1. Excluded participants demographics.** The mean [s.d] are presented for quantitative phenotypes. FI scores are presented  
74 as z-scores (Methods and *Supplementary Material*)

Supplementary Table 2 | Expanded description of ND-CNV carriers and non-carriers who attempted the fluid intelligence (FI) test with imputation data

| Variable                     | All ND-CNVs                   | All dup. carriers             | All del. carriers             | 15q11.2 del.                  | 16p13.11 dup.                 | 22q11.2 dup.                  | 1q21.1 dup.                   | 16p12.1 del.                  | NRXN1 del.                    | 16p11.2 dup.                  | 16p11.2 distal dup.           | 1q21.1 del.                   | Non-carriers                  |
|------------------------------|-------------------------------|-------------------------------|-------------------------------|-------------------------------|-------------------------------|-------------------------------|-------------------------------|-------------------------------|-------------------------------|-------------------------------|-------------------------------|-------------------------------|-------------------------------|
| <b>n max.</b>                | 1,318                         | 561                           | 764                           | 543                           | 275                           | 83                            | 73                            | 64                            | 56                            | 46                            | 38                            | 35                            | 152,325                       |
| <b>Sex - %male</b>           | 51                            | 52                            | 50                            | 50                            | 49                            | 53                            | 53                            | 47                            | 46                            | 52                            | 55                            | 40                            | 47                            |
| <b>Age (years)</b>           | 57.16 [8.35]<br>{40,80}       | 56.53 [8.33]<br>{40, 78}      | 57.65 [8.36]<br>{40, 80}      | 58.33 [8.35]<br>{40,80}       | 57.32 [8.14]<br>{40,77}       | 55.39 [8.31]<br>{41,70}       | 57.77 [7.60]<br>{40,73}       | 57.09 [8.08]<br>{40,80}       | 56.82 [8.18]<br>{40,74}       | 54.72 [8.51]<br>{41,71}       | 55.37 [9.05]<br>{40,72}       | 54.72 [8.70]<br>{40,70}       | 58.53 [8.28]<br>{40,82}       |
| - male                       | 57.60 [8.53]<br>{40,80}       | 56.87 [8.40]<br>{40, 78}      | 58.19 [8.64]<br>{40, 80}      | 58.89 [8.52]<br>{40,80}       | 57.05 [8.18]<br>{40,77}       | 56.39 [8.56]<br>{41,70}       | 57.08 [8.13]<br>{40,73}       | 57.60 [8.53]<br>{40,80}       | 58.77 [8.55]<br>{44,74}       | 56.08 [9.13]<br>{41,71}       | 57.67 [8.33]<br>{40,67}       | 51.00 [8.69]<br>{40,68}       | 58.97 [8.42]<br>{40,81}       |
| - female                     | 56.71 [8.14]<br>{40,79}       | 56.17 [8.26]<br>{40, 73}      | 57.11 [8.05]<br>{40, 79}      | 57.76 [8.15]<br>{40,79}       | 57.58 [8.13]<br>{40,73}       | 54.26 [7.98]<br>{41,68}       | 58.56 [6.99]<br>{43,69}       | 56.71 [8.14]<br>{40,79}       | 55.13 [7.59]<br>{40,66}       | 53.23 [7.71]<br>{41,65}       | 52.53 [9.34]<br>{41,72}       | 56.52 [8.17]<br>{42,70}       | 58.15 [8.14]<br>{40,82}       |
| <b>TDI score</b>             | -1.01 [2.99]<br>{-6.18, 8.99} | -0.69 [3.12]<br>{-6.16, 8.99} | -1.23 [2.89]<br>{-6.18, 7.69} | -1.34 [2.77]<br>{-6.17, 7.63} | -0.98 [3.08]<br>{-5.55, 8.99} | -0.44 [2.87]<br>{-4.93, 5.83} | -0.02 [3.39]<br>{-6.16, 7.46} | -1.30 [2.86]<br>{-5.03, 7.69} | -1.53 [3.36]<br>{-5.88, 7.66} | -0.1 [3.19]<br>{-4.88, 7.66}  | -0.46 [3.27]<br>{-5.09, 8.62} | -1.26 [2.76]<br>{-5.80, 4.99} | -1.58 [2.77]<br>{-6.26, 9.89} |
| - male                       | -1.12 [2.97]<br>{-6.16 ,8.99} | -0.78 [3.14]<br>{-5.23, 8.99} | -1.38 [2.82]<br>{-6.18, 7.69} | -1.53 [2.76]<br>{-6.17, 7.60} | -0.61 [3.08]<br>{-5.55, 7.54} | 0.04 [2.93]<br>{-4.29, 5.83}  | 0.38 [3.23]<br>{-4.42, 7.46}  | -0.85 [3.07]<br>{-4.91, 7.69} | -1.70 [3.37]<br>{-5.88, 5.78} | -0.13 [3.57]<br>{-4.29, 7.66} | -1.20 [3.11]<br>{-4.60, 8.62} | -1.15 [2.53]<br>{-4.49, 3.91} | -1.58 [2.81]<br>{-6.26, 9.89} |
| - female                     | -0.89 [3.00]<br>{-6.18, 7.66} | -0.60 [3.11]<br>{-6.16, 7.54} | -1.86 [2.96]<br>{-6.18, 7.66} | -1.15 [2.78]<br>{-6.18, 7.63} | -1.37 [3.05]<br>{-5.23, 8.99} | -0.98 [2.75]<br>{-4.93, 4.78} | -0.50 [3.56]<br>{-6.16, 5.98} | -7.67 [2.64]<br>{-5.03, 6.46} | -1.38 [3.41]<br>{-5.05, 7.66} | -0.34 [2.78]<br>{-4.88, 4.69} | 0.47 [3.32]<br>{-5.09, 4.50}  | -1.32 [2.96]<br>{-5.80, 4.99} | -1.58 [2.74]<br>{-6.26, 9.52} |
| <b>FI score (z)</b>          | -0.41 [0.96]<br>{-2.98, 2.75} | -0.45 [0.99]<br>{-2.98, 2.75} | -0.38 [0.94]<br>{-2.98, 2.28} | -0.33 [0.92]<br>{-2.50, 2.28} | -0.3 [0.98]<br>{-2.98, 2.75}  | -0.58 [0.79]<br>{-2.03, 0.84} | -0.37 [1.16]<br>{-2.50, 2.75} | -0.58 [0.98]<br>{-2.50, 2.28} | -0.23 [0.89]<br>{-2.5, 1.32}  | -1.04 [0.93]<br>{-2.50, 1.32} | -0.35 [0.87]<br>{-2.03, 1.80} | -0.55 [0.91]<br>{-2.50, 0.84} | 0.004 [0.1]<br>{-2.98, 3.23}  |
| - male                       | -0.39 [0.98]<br>{-2.98, 2.75} | -0.44 [1.05]<br>{-2.98, 2.75} | -0.35 [0.93]<br>{-2.50, 2.28} | -0.27 [0.92]<br>{-2.50, 2.28} | -0.26 [1.04]<br>{-2.50, 2.75} | -0.54 [0.82]<br>{-2.03, 0.84} | -0.42 [1.17]<br>{-2.50, 2.75} | -0.47 [1.14]<br>{-2.50, 2.28} | -0.35 [0.8]<br>{-2.03, 1.32}  | -1.09 [0.92]<br>{-2.50, 1.32} | -0.21 [0.98]<br>{-2.03, 1.80} | -0.87 [0.83]<br>{-2.03, 0.36} | -0.06 [1.03]<br>{-2.98, 3.23} |
| - female                     | -0.43 [0.94]<br>{-2.98, 2.75} | -0.46 [0.93]<br>{-2.98, 2.75} | -0.41 [0.94]<br>{-2.98, 2.28} | -0.4 [0.91]<br>{-2.50, 2.28}  | -0.35 [0.91]<br>{-2.98, 2.28} | -0.62 [0.76]<br>{-2.03, 0.84} | -0.31 [1.17]<br>{-2.50, 2.75} | -0.68 [0.82]<br>{-2.03, 0.84} | -0.13 [0.97]<br>{-2.5, 1.32}  | -0.98 [0.96]<br>{-2.50, 1.32} | -0.54 [0.69]<br>{-2.03, 0.84} | -0.34 [0.91]<br>{-2.50, 0.84} | -0.04 [0.97]<br>{-2.98, 3.23} |
| <b>Employment status</b>     |                               |                               |                               |                               |                               |                               |                               |                               |                               |                               |                               |                               |                               |
| - Employed/Self-employed     | 717                           | 313                           | 406                           | 286                           | 170                           | 42                            | 35                            | 33                            | 31                            | 17                            | 25                            | 23                            | 78,020                        |
| - Retired                    | 462                           | 185                           | 281                           | 215                           | 91                            | 28                            | 29                            | 21                            | 20                            | 16                            | 7                             | 7                             | 62,824                        |
| - Student                    | 0                             | 0                             | 0                             | 0                             | 0                             | 0                             | 0                             | 0                             | 0                             | 0                             | 0                             | 0                             | 271                           |
| - Carer / Looking after home | 31                            | 10                            | 21                            | 14                            | 1                             | 4                             | 0                             | 4                             | 2                             | 1                             | 2                             | 1                             | 3,652                         |
| - Voluntary work             | 7                             | 4                             | 3                             | 1                             | 1                             | 2                             | 0                             | 1                             | 0                             | 0                             | 0                             | 0                             | 741                           |
| - Unable to work             | 60                            | 29                            | 31                            | 16                            | 6                             | 5                             | 4                             | 3                             | 2                             | 9                             | 2                             | 3                             | 3,350                         |
| - Unemployed                 | 32                            | 17                            | 16                            | 7                             | 5                             | 2                             | 4                             | 1                             | 0                             | 3                             | 1                             | 1                             | 2,374                         |
| - Prefer not to answer       | 1                             | 1                             | 0                             | 0                             | 1                             | 0                             | 0                             | 0                             | 0                             | 0                             | 0                             | 0                             | 353                           |
| - None of the above          | 7                             | 2                             | 5                             | 4                             | 0                             | 0                             | 1                             | 0                             | 1                             | 0                             | 1                             | 0                             | 705                           |
| - NA                         | 1                             | 0                             | 1                             | 0                             | 0                             | 0                             | 0                             | 1                             | 0                             | 0                             | 0                             | 0                             | 35                            |
| <b>Ed. Attainment</b>        |                               |                               |                               |                               |                               |                               |                               |                               |                               |                               |                               |                               |                               |
| - primary                    | 539                           | 232                           | 310                           | 225                           | 101                           | 36                            | 38                            | 20                            | 25                            | 23                            | 13                            | 12                            | 59,373                        |
| - secondary                  | 183                           | 66                            | 119                           | 88                            | 32                            | 8                             | 10                            | 13                            | 7                             | 3                             | 5                             | 3                             | 17,920                        |
| - tertiary                   | 319                           | 136                           | 184                           | 122                           | 83                            | 18                            | 10                            | 16                            | 19                            | 6                             | 10                            | 15                            | 53,567                        |
| - Prefer not to answer       | 276                           | 127                           | 150                           | 108                           | 59                            | 21                            | 15                            | 14                            | 5                             | 14                            | 10                            | 5                             | 21,430                        |
| - NA                         | 1                             | 0                             | 1                             | 0                             | 0                             | 0                             | 0                             | 1                             | 0                             | 0                             | 0                             | 0                             | 35                            |

76 **Supplementary Table 2. Expanded description of ND-CNV carriers and non-carriers who attempted the fluid intelligence (FI) test with**  
77 **imputation data.** The mean [s.d] are presented for quantitative phenotypes. FI scores are presented as z-scores (Methods and *Supplementary*  
78 *Material*).



Supplementary Table 3 | Expanded description of ND-CNV carriers and non-carriers who attempted the fluid intelligence (FI) test with exome data

| Variable                     | All ND-CNVs                   | All dup. carriers             | All del. carriers             | 15q11.2 del.                  | 16p13.11 dup.                 | 22q11.2 dup.                  | 1q21.1 dup.                   | 16p12.1 del.                  | NRXN1 del.                    | 16p11.2 dup.                  | 16p11.2 distal dup.           | 1q21.1 del.                   | Non-carriers                  |
|------------------------------|-------------------------------|-------------------------------|-------------------------------|-------------------------------|-------------------------------|-------------------------------|-------------------------------|-------------------------------|-------------------------------|-------------------------------|-------------------------------|-------------------------------|-------------------------------|
| n max.                       | 1,275                         | 542                           | 740                           | 523                           | 267                           | 81                            | 68                            | 62                            | 55                            | 44                            | 37                            | 33                            | 146,894                       |
| Sex - %male                  | 50                            | 51                            | 49                            | 50                            | 49                            | 53                            | 51                            | 47                            | 45                            | 52                            | 55                            | 40                            | 47                            |
| Age (years)                  | 57.23 [8.33]<br>{40,80}       | 56.67 [8.32]<br>{40, 78}      | 56.67 [8.32]<br>{40, 80}      | 58.36 [8.33]<br>{40,80}       | 57.39 [8.13]<br>{40,77}       | 55.68 [8.19]<br>{41,70}       | 57.94 [7.77]<br>{40,73}       | 57.19 [7.95]<br>{42,77}       | 56.98 [8.17]<br>{40,74}       | 55.18 [8.38]<br>{41,71}       | 55.57 [9.09] {40,72}          | 55.18 [8.70]<br>{40,70}       | 58.53 [8.28]<br>{40,82}       |
| - male                       | 57.69 [8.54]<br>{40,80}       | 57.03 [8.40]<br>{40, 78}      | 58.22 [8.65]<br>{40, 80}      | 58.87 [8.56]<br>{40,80}       | 57.14 [8.13]<br>{40,77}       | 56.74 [8.32]<br>{41,70}       | 57.46 [8.46]<br>{40,73}       | 57.41 [8.51]<br>{42,77}       | 59.20 [8.44]<br>{44,74}       | 55.00 [9.16]<br>{41,71}       | 57.67 [8.33] {40,67}          | 55.18 [8.69]<br>{40,68}       | 58.96 [8.42]<br>{40,81}       |
| - female                     | 56.78 [8.10]<br>{40,79}       | 56.29 [8.24]<br>{40, 73}      | 57.15 [8.00]<br>{40, 79}      | 57.86 [8.08]<br>{40,79}       | 57.64 [8.15]<br>{40,73}       | 54.47 [7.97]<br>{41,68}       | 58.45 [7.07]<br>{43,69}       | 57.00 [7.55]<br>{43,75}       | 55.13 [7.59]<br>{40,66}       | 53.81 [7.39]<br>{43,65}       | 52.81 [9.58] {41,72}          | 56.52 [8.17]<br>{42,70}       | 58.14 [8.14]<br>{40,82}       |
| TDI score                    | -1.03 [2.99]<br>{-6.18, 8.99} | -0.71 [3.13]<br>{-6.16, 8.99} | -1.25 [2.89]<br>{-6.18, 7.69} | -1.37 [2.76]<br>{-6.18, 7.63} | -0.98 [3.09]<br>{-5.55, 8.99} | -0.40 [2.89]<br>{-4.93, 5.83} | -0.06 [3.45]<br>{-6.16, 7.46} | -1.29 [2.90]<br>{-5.03, 7.69} | -1.62 [3.33]<br>{-5.88, 7.66} | -0.23 [3.11]<br>{-4.88, 7.66} | -0.57 [3.24] {-5.09, 8.62}    | -1.26 [2.76]<br>{-5.80, 4.99} | -1.58 [2.77]<br>{-6.26, 9.89} |
| - male                       | -1.15 [2.97]<br>{-6.16, 8.99} | -0.08 [3.14]<br>{-5.23, 8.99} | -1.41 [2.82]<br>{-6.16, 7.69} | -1.55 [2.76]<br>{-6.16, 7.60} | -1.36 [3.06]<br>{-5.23, 8.99} | -0.06 [2.96]<br>{-4.29, 5.83} | 0.42 [3.45]<br>{-4.41, 7.46}  | -0.85 [3.12]<br>{-4.91, 7.69} | -1.91 [3.33]<br>{-5.88, 5.78} | -0.14 [3.39]<br>{-4.29, 7.66} | -1.21 [3.11] {-4.60, 8.62}    | -1.15 [2.53]<br>{-4.49, 3.91} | -1.58 [2.81]<br>{-6.26, 9.89} |
| - female                     | -0.91 [3.01]<br>{-6.18, 7.66} | -0.61 [3.12]<br>{-6.16, 7.54} | -1.10 [2.95]<br>{-6.18, 7.66} | -1.18 [2.76]<br>{-6.18, 7.63} | -0.61 [3.09]<br>{-5.55, 7.54} | -0.91 [2.76]<br>{-4.93, 4.78} | -0.56 [3.59]<br>{-6.16, 5.98} | -1.68 [2.68]<br>{-5.03, 6.46} | -1.38 [3.41]<br>{-5.05, 7.66} | -0.32 [2.86]<br>{-4.88, 4.69} | 0.27 [3.31] {5.09, 4.50}      | -1.32 [2.96]<br>{-5.80, 4.99} | -1.58 [2.74]<br>{-6.26, 9.52} |
| FI score (z)                 | -0.38 [0.98]<br>{-2.98, 2.76} | -0.43 [1.00]<br>{-2.98, 2.76} | -0.38 [0.93]<br>{-2.98, 2.28} | -0.34 [0.91]<br>{-2.51, 2.28} | -0.29 [0.98]<br>{-2.98, 2.76} | -0.56 [0.78]<br>{-2.03, 0.84} | -0.32 [1.19]<br>{-2.51, 2.76} | -0.58 [0.98]<br>{-2.51, 2.28} | -0.20 [0.87]<br>{-2.51, 1.32} | -1.03 [0.94] {-2.51, 1.32}    | -0.35 [0.88]<br>{-2.03, 1.80} | -0.55 [0.91]<br>{-2.50, 0.84} | 0.003 [1.00]<br>{-2.98, 3.23} |
| - male                       | -0.38 [0.98]<br>{-2.98, 2.76} | -0.41 [1.05]<br>{-2.98, 2.76} | -0.36 [0.93]<br>{-2.51, 2.28} | -0.28 [0.91]<br>{-2.51, 2.28} | -0.22 [1.04]<br>{-2.51, 2.76} | -0.54 [0.83]<br>{-2.03, 0.84} | -0.36 [1.21]<br>{-2.51, 2.76} | -0.43 [1.15]<br>{-2.51, 2.28} | -0.29 [0.74]<br>{-1.55, 1.32} | -1.05 [0.92] {-2.51, 1.32}    | -0.21 [0.98]<br>{-2.03, 1.80} | -0.87 [0.83]<br>{-2.03, 0.36} | 0.06 [1.04]<br>{-2.98, 3.23}  |
| - female                     | -0.43 [0.93]<br>{-2.98, 2.76} | -0.45 [0.94]<br>{-2.98, 2.76} | -0.41 [0.93]<br>{-2.98, 2.28} | -0.40 [0.90]<br>{-2.51, 1.80} | -0.35 [0.91]<br>{-2.98, 2.28} | -0.58 [0.73]<br>{-2.03, 0.84} | -0.29 [1.18]<br>{-2.51, 2.76} | -0.71 [0.81]<br>{-2.03, 0.84} | -0.13 [0.97]<br>{-2.51, 1.32} | -1.00 [0.98] {-2.51, 1.32}    | -0.53 [0.72]<br>{-2.03, 0.84} | -0.34 [0.92]<br>{-2.50, 0.84} | 0.84 [0.97]<br>{-2.98, 3.23}  |
| <b>Employment status</b>     |                               |                               |                               |                               |                               |                               |                               |                               |                               |                               |                               |                               |                               |
| - Employed/Self-employed     | 694                           | 301                           | 395                           | 276                           | 164                           | 41                            | 32                            | 33                            | 31                            | 16                            | 24                            | 23                            | 75,262                        |
| - Retired                    | 450                           | 181                           | 273                           | 208                           | 90                            | 28                            | 27                            | 20                            | 20                            | 16                            | 7                             | 7                             | 60,569                        |
| - Student                    | 0                             | 0                             | 0                             | 0                             | 0                             | 0                             | 0                             | 0                             | 0                             | 0                             | 0                             | 0                             | 264                           |
| - Carer / Looking after home | 31                            | 10                            | 21                            | 14                            | 1                             | 4                             | 0                             | 4                             | 2                             | 1                             | 2                             | 1                             | 3,541                         |
| - Voluntary work             | 7                             | 4                             | 3                             | 1                             | 1                             | 2                             | 0                             | 1                             | 0                             | 0                             | 0                             | 0                             | 713                           |
| - Unable to work             | 54                            | 27                            | 27                            | 14                            | 5                             | 5                             | 4                             | 2                             | 1                             | 8                             | 2                             | 3                             | 3,218                         |
| - Unemployed                 | 30                            | 16                            | 15                            | 6                             | 5                             | 1                             | 4                             | 1                             | 0                             | 3                             | 1                             | 0                             | 2,276                         |
| - Prefer not to answer       | 1                             | 1                             | 0                             | 0                             | 1                             | 0                             | 0                             | 0                             | 0                             | 0                             | 0                             | 0                             | 334                           |
| - None of the above          | 7                             | 2                             | 5                             | 4                             | 0                             | 0                             | 1                             | 0                             | 1                             | 0                             | 1                             | 0                             | 682                           |
| - NA                         | 1                             | 0                             | 1                             | 0                             | 0                             | 0                             | 0                             | 1                             | 0                             | 0                             | 0                             | 0                             | 35                            |
| <b>Ed. Attainment</b>        |                               |                               |                               |                               |                               |                               |                               |                               |                               |                               |                               |                               |                               |
| - primary                    | 522                           | 225                           | 300                           | 219                           | 98                            | 36                            | 35                            | 18                            | 24                            | 22                            | 13                            | 12                            | 57,251                        |
| - secondary                  | 175                           | 61                            | 116                           | 85                            | 31                            | 8                             | 9                             | 13                            | 7                             | 2                             | 4                             | 3                             | 17,296                        |
| - tertiary                   | 311                           | 134                           | 178                           | 116                           | 82                            | 17                            | 10                            | 16                            | 19                            | 6                             | 10                            | 15                            | 51,607                        |
| - Prefer not to answer       | 266                           | 122                           | 145                           | 103                           | 56                            | 20                            | 14                            | 14                            | 5                             | 14                            | 10                            | 5                             | 20,705                        |
| - NA                         | 1                             | 0                             | 1                             | 0                             | 0                             | 0                             | 0                             | 1                             | 0                             | 0                             | 0                             | 0                             | 35                            |

80 ***Supplementary Table 3. Expanded description of ND-CNV carriers and non-carriers who attempted the fluid intelligence (FI) test with exome***  
81 ***data.*** The mean [s.d] are presented for quantitative phenotypes. FI scores are presented as z-scores (Methods and Supplementary Materials

**Supplementary Table 4 | List of 49 ND-CNVs from Kendall et al., 2019**

| <b><i>ND-CNV</i></b>                            | <b><i>Location (hg19)</i></b> | <b><i>Max. genes in region</i></b> | <b><i>Penetrance (%)</i></b> | <b><i>Associated NDDs &amp; references</i></b> |
|-------------------------------------------------|-------------------------------|------------------------------------|------------------------------|------------------------------------------------|
| 1p36 del.                                       | chr1:0-2,50                   | 76                                 | 100                          | ID, DD <sup>5</sup>                            |
| 1p36 dup.                                       | chr1:0-2,50                   | 76                                 | -                            | ID, DD <sup>6</sup>                            |
| 1q21.1 del.                                     | chr1:146,53-147,39            | 91                                 | 35                           | ID, DD, ASD, ADHD, SCZ <sup>7</sup>            |
| 1q21.1 dup.                                     | chr1:146,53-147,39            | 91                                 | 18                           | ID, DD, ASD, ADHD <sup>7</sup>                 |
| 2p16.3 del. (NRXN1)                             | chr2:50,14-51,26              | 1                                  | 26                           | ID, DD, ASD, SCZ <sup>8,9</sup>                |
| 2q21.2 del.                                     | chr2:131,48-131,93            | 5                                  | -                            | ID, DD <sup>10</sup>                           |
| 2q37 del.                                       | chr2:239,72-243,2             | 51                                 | 100                          | ID, DD <sup>11</sup>                           |
| 3q29 del.                                       | chr3:195,72-197,35            | 28                                 | 53                           | ID, DD, ASD, ADHD, SCZ <sup>12</sup>           |
| 4p16.3 del. (Wolf-Hirschhorn)                   | chr4:1,55-2,09                | 13                                 | 100                          | ID, DD <sup>13</sup>                           |
| 4p16.3 dup. (Wolf-Hirschhorn)                   | chr4:1,55-2,09                | 13                                 | 100                          | ID, DD <sup>14</sup>                           |
| 5q35 del. (Sotos syndrome)                      | chr5:175,72-177,05            | 39                                 | 100                          | ID, DD <sup>15</sup>                           |
| 7q11.23 del. (William-Beuren syndrome)          | chr7:72,74-74,14              | 26                                 | 100                          | ID, DD, ADHD <sup>16</sup>                     |
| 7q11.23 dup. (William-Beuren syndrome)          | chr7:72,74-74,14              | 26                                 | 44                           | ID, DD, ADHD, SCZ <sup>16</sup>                |
| 8p23.1 del.                                     | chr8:8,10-11,87               | 35                                 | 97                           | ID, DD, ASD, ADHD <sup>17</sup>                |
| 8p23.1 dup.                                     | chr8:8,10-11,87               | 35                                 | 100                          | ID, DD <sup>18</sup>                           |
| 9q34.3 del. (EHMT1)                             | chr9:140,51-140,73            | 2                                  | 100                          | ID, DD <sup>19</sup>                           |
| 10q23 del.                                      | chr10:82,05-88,93             | 29                                 | 100                          | ID, DD <sup>20</sup>                           |
| 11p11.2 del. (Potocki-Shaffer)                  | chr11:43,94-46,02             | 22                                 | -                            | ID, DD <sup>21</sup>                           |
| 15q11.2 del.                                    | chr15:22,81-23,09             | 5                                  | 11                           | ID, DD, ASD, ADHD, SCZ <sup>22</sup>           |
| 15q11-q13 del. (Prader-Willi/Angelman Syndrome) | chr15:23,68-28,39             | 116                                | 100                          | ID, DD, ASD <sup>23</sup>                      |
| 15q11-q13 dup. (Prader-Willi/Angelman syndrome) | chr15:23,68-28,39             | 116                                | 54                           | ID, DD, ASD <sup>23</sup>                      |
| 15q13.3 del. BP4-BP5                            | chr15:29,16-32,46             | 17                                 | 89                           | ID, DD, ASD, ADHD <sup>24</sup>                |
| 15q24 del.                                      | chr15:72,90-78,15             | 77                                 | 100                          | ID, DD, ASD, ADHD <sup>25</sup>                |
| 15q24 dup.                                      | chr15:72,90-78,15             | 77                                 | 100                          | ID, DD, ASD, ADHD <sup>25</sup>                |
| 15q25 del.                                      | chr15:83,22-85,72             | 34                                 | 100                          | ID, DD, ASD <sup>26</sup>                      |
| 16q13.11 del.                                   | chr16:15,51-16,29             | 7                                  | 14                           | ID, DD, ASD, SCZ <sup>27</sup>                 |
| 16q13.11 dup.                                   | chr16:15,51-16,29             | 7                                  | 8.4                          | ID, DD, ASD, ADHD, SCZ <sup>28</sup>           |
| 16p12.1 del.                                    | chr16:21,95-22,43             | 8                                  | 13                           | ID, DD <sup>29</sup>                           |
| 16p11.2 distal del.                             | chr16:28,82-29,05             | 11                                 | 23                           | ID, DD, ASD, ADHD, SCZ <sup>30</sup>           |
| 16p11.2 distal dup.                             | chr16:28,82-29,05             | 11                                 | 5.3                          | ID, DD, ASD, ADHD, SCZ <sup>31</sup>           |
| 16p11.2 del.                                    | chr16:29,65-30,20             | 30                                 | 8                            | ID, DD, ASD, ADHD, SCZ <sup>30</sup>           |
| 16p11.2 dup.                                    | chr16:29,65-30,20             | 30                                 | 26                           | ID, DD <sup>31</sup>                           |
| 17p13.3 del. (YWHAE)                            | chr17:1,25-1,30               | 1                                  | 14                           | ID, DD <sup>32</sup>                           |
| 17p13.3 dup. (YWHAE)                            | chr17:1,25-1,30               | 1                                  | 9                            | ID, DD, ASD <sup>33</sup>                      |
| 17p13.3 del. (PAFAH1B1)                         | chr17:2,49-2,59               | 1                                  | 17                           | ID, DD <sup>32</sup>                           |
| 17p13.3 dup. (PAFAH1B1)                         | chr17:2,49-2,59               | 1                                  | 17                           | ID, DD <sup>33</sup>                           |
| 17q11.2 del. (Smith-Magenis Syndrome)           | chr17:16,81-20,21             | 59                                 | 100                          | ID, DD, ADHD, ASD <sup>34</sup>                |
| 17p11.2 dup. (Potocki-Lupski)                   | chr17:16,81-20,21             | 59                                 | 98                           | ID, DD, ASD, ADHD <sup>35</sup>                |
| 17q11.2 del. (NF1)                              | chr17:29,12-30,27             | 19                                 | 38                           | ID, DD, ASD <sup>36</sup>                      |
| 17q11.2 dup. (NF1)                              | chr17:29,12-30,27             | 19                                 | 98                           | ID, DD <sup>37</sup>                           |
| 17q12 dup.                                      | chr17:34,81-36,22             | 19                                 | 17                           | ID, DD, ASD, SCZ <sup>38</sup>                 |
| 17q12 del.                                      | chr17:34,81-36,22             | 19                                 | 39                           | ID, DD, ASD, SCZ <sup>38</sup>                 |
| 17q21.31 del.                                   | chr17:43,70-44,29             | 10                                 | 100                          | ID, DD <sup>39</sup>                           |
| 22q11.2 del.                                    | chr22:19,04-21,47             | 61                                 | 100                          | ID, DD, ASD, SCZ, ADHD <sup>40,41</sup>        |
| 22q11.2 dup.                                    | chr22:19,04-21,47             | 61                                 | 14                           | ID, DD <sup>42</sup>                           |
| 22q11.2 distal del.                             | chr22:21,92-23,65             | 26                                 | 100                          | ID, DD, SCZ <sup>43</sup>                      |
| 22q11.2 distal dup.                             | chr22:21,92-23,65             | 26                                 | 16                           | ID, DD <sup>44</sup>                           |
| 22q13 del. (SHANK3)                             | chr22:51,11-51,17             | 1                                  | 100                          | ID, DD, ASSD, SCZ <sup>45</sup>                |
| 22q13 dup. (SHANK3)                             | chr22:51,11-51,17             | 1                                  | 100                          | ID, DD, ADHD <sup>45</sup>                     |

83 **Supplementary Table 4. List of 49 ND-CNV defined by Kendall et al. 2019<sup>46</sup>.** The list of CNV  
84 loci defined as ND-CNVs in this analysis. Consensus penetrance estimates were derived from  
85 Kirov et al.<sup>47</sup> and Rosenfeld et al.<sup>48</sup>.

**Supplementary Table 5 | ND-CNVs loci carried by included participants**

| <b>ND-CNV locus</b>              | <b><i>n</i> (PGS)</b> | <b><i>n</i> (Exome)</b> | <b><i>n</i> (UKB)</b> | <b>Location (hg19)</b> | <b><i>Max no. genes in region</i></b> | <b><i>Penetrance % (DD, ASD, CM)</i></b> | <b><i>Penetrance % (SCZ)</i></b> | <b><i>Associated NDDs &amp; References</i></b> |
|----------------------------------|-----------------------|-------------------------|-----------------------|------------------------|---------------------------------------|------------------------------------------|----------------------------------|------------------------------------------------|
| 15q11.2 del.                     | 543                   | 514                     | 1,748                 | chr15:22,81-23,09      | 5                                     | 11.0                                     | 2.0                              | ID, DD, ASD, ADHD, SCZ <sup>22</sup>           |
| 16p13.11 dup.                    | 275                   | 258                     | 888                   | chr16:15,51-16,29      | 7                                     | 8.4                                      | 2.2                              | ID, DD, ASD, ADHD, SCZ <sup>28</sup>           |
| 22q11.2 dup.                     | 83                    | 80                      | 294                   | chr22:19,04-21,47      | 61                                    | 14.0                                     | 0.0                              | ID, DD <sup>42</sup>                           |
| 1q21.1 dup.                      | 73                    | 64                      | 193                   | chr1:146,53-147,39     | 9                                     | 18.0                                     | 2.9                              | ID, DD, ASD, ADHD, SCZ <sup>7</sup>            |
| 16p12.1 del.                     | 64                    | 58                      | 260                   | chr16:21,95-22,43      | 8                                     | 13.0                                     | 3.1                              | ID, DD <sup>29</sup>                           |
| NRXN1 del.                       | 56                    | 52                      | 175                   | chr2:50,14-51,26       | 1                                     | 26.0                                     | 6.4                              | ID, DD, ASD, SCZ <sup>8,9</sup>                |
| 16p11.2 dup.                     | 46                    | 43                      | 142                   | chr16:29,65-30,20      | 30                                    | 26.0                                     | 8.0                              | ID, DD <sup>31</sup>                           |
| 16p11.2 distal dup.              | 38                    | 37                      | 144                   | chr16:28,82-29,05      | 11                                    | 5.3                                      | 0.7                              | ID, DD, ASD, ADHD, SCZ <sup>31</sup>           |
| 1q21.1 del.                      | 35                    | 33                      | 119                   | chr1:146,53-147,39     | 9                                     | 35.0                                     | 5.2                              | ID, DD, ASD, SCZ <sup>7</sup>                  |
| 16p11.2 del.                     | 28                    | 27                      | 123                   | chr16:29,65-30,20      | 30                                    | 8.0                                      | 0.3                              | ID, DD, ASD, ADHD, SCZ <sup>30</sup>           |
| 17q12 dup.                       | 27                    | 26                      | 104                   | chr17:34,81-36,22      | 17                                    | 17.0                                     | 1.7                              | ID, DD, ASD, SCZ <sup>38</sup>                 |
| 16p11.2 distal del.              | 14                    | 11                      | 62                    | chr16:28,82-29,05      | 11                                    | 23.0                                     | 2.6                              | ID, DD, ASD, ADHD, SCZ <sup>30</sup>           |
| 17q11.2 ( <i>NF1</i> ) del.      | 7                     | 7                       | 11                    | chr17:29,12-30,27      | 19                                    | 38.0                                     | 0.0                              | ID, DD, ASD <sup>36</sup>                      |
| 17p13.3 ( <i>YWHAE</i> ) del.    | 6                     | 6                       | 27                    | chr17:1,25-1,30        | 1                                     | 14.0                                     | 0.0                              | ID, DD <sup>32</sup>                           |
| 17q12 del.                       | 4                     | 4                       | 9                     | chr17:34,81-36,22      | 19                                    | 39.0                                     | 4.0                              | ID, DD, ASD, SCZ <sup>38</sup>                 |
| 17p13.3 ( <i>YWHAE</i> ) dup.    | 4                     | 4                       | 8                     | chr17:1,25-1,30        | 1                                     | 9.0                                      | 1.3                              | ID, DD <sup>33</sup>                           |
| 15q24 dup.                       | 3                     | 2                       | 10                    | chr15:72,90-78,15      | 77                                    | 100.0                                    | 0.0                              | ID, DD, ASD, ADHD <sup>25</sup>                |
| WBS dup.                         | 3                     | 3                       | 16                    | chr7:72,74-74,14       | 26                                    | 44.0                                     | 6.0                              | ID, DD, ASD, SCZ <sup>16</sup>                 |
| 22q11.2 del.                     | 3                     | 3                       | 10                    | chr22:19,04-21,47      | 61                                    | 88.0                                     | 12.0                             | ID, DD, ASD, SCZ <sup>40,41</sup>              |
| PWS dup.                         | 2                     | 2                       | 19                    | chr15:23,68-28,39      | 116                                   | 4.2                                      | 0.5                              | ID, DD, ASD <sup>23</sup>                      |
| 8p23.1 del.                      | 2                     | 2                       | 4                     | chr8:8,10-11,87        | 6                                     | 97.0                                     | 3.3                              | ID, DD, ASD, ADHD <sup>17</sup>                |
| 8p23.1 dup.                      | 2                     | 2                       | 8                     | chr8:8,10-11,87        | 6                                     | 100.0                                    | 0.0                              | ID, DD <sup>18</sup>                           |
| 3q29 del.                        | 2                     | 2                       | 9                     | chr3:195,72-197,35     | 28                                    | 53.0                                     | 18.0                             | ID, DD, ASD, ADHD, SCZ <sup>12</sup>           |
| 22q11.2 distal dup.              | 2                     | 1                       | 14                    | chr22:21,92-23,65      | 26                                    | 16.0                                     | 0.0                              | ID, DD <sup>44</sup>                           |
| 10q23 del.                       | 1                     | 1                       | 3                     | chr10:82,05-88,93      | 29                                    | 100.0                                    | 0.0                              | ID, DD <sup>20</sup>                           |
| Wolf-Hirschhorn del.             | 1                     | 1                       | 3                     | chr4:1,55-2,09         | 13                                    | 100.0                                    | 0.0                              | ID, DD <sup>13</sup>                           |
| 2p37 del.                        | 1                     | 1                       | 1                     | chr2:239,72-243,2      | 51                                    | 100.0                                    | 0.0                              | ID, DD, ASD <sup>11</sup>                      |
| 22q11.2 distal del.              | 1                     | 1                       | 5                     | chr22:21,92-23,65      | 26                                    | 100.0                                    | 0.0                              | ID, DD <sup>43</sup>                           |
| 17p13.3 ( <i>PAFAH1B1</i> ) dup. | 1                     | 1                       | 3                     | chr17:2,49-2,59        | 1                                     | 17.0                                     | 0.0                              | ID, DD <sup>33</sup>                           |
| 17q11.2 ( <i>NF1</i> ) dup.      | 1                     | 1                       | 3                     | chr17:29,12-30,27      | 19                                    | 98.0                                     | 1.7                              | ID, DD <sup>37</sup>                           |

87 **Supplementary Table 5. ND-CNVs carried by included participants.** Consensus penetrance estimates were derived from Kirov et al.<sup>47</sup> and  
88 Rosenfeld et al.<sup>48</sup>. All identified ND-CNV loci were heterozygous. *n (PGS)* = no. of participants included in polygenic score analysis with ND-CNV;  
89 *n (Exome)* = no. of participants included in rare variant analysis with ND-CNV; *n (UKB)* = no. of participants identified in the UK Biobank with ND-  
90 CNV.

| <b>Supplementary Table 6   Multicollinearity testing for PS_Cog models</b> |                   |                  |            |
|----------------------------------------------------------------------------|-------------------|------------------|------------|
| <b>Cohort</b>                                                              | <b>Variable</b>   | <b>Tolerance</b> | <b>VIF</b> |
| All ND-CNV carriers                                                        | PS_Cog            | 0.99             | 1.01       |
|                                                                            | Ed. Attainment    | 0.98             | 1.02       |
|                                                                            | TDI score         | 0.98             | 1.02       |
|                                                                            | Batch             | 1.00             | 1.00       |
| ND-CNV (without 15q/16p)                                                   | PS_Cog            | 0.99             | 1.01       |
|                                                                            | Ed. Attainment    | 0.94             | 1.06       |
|                                                                            | TDI score         | 0.95             | 1.06       |
|                                                                            | PC3               | 1.00             | 1.00       |
| All deletions                                                              | PS_Cog            | 0.98             | 1.02       |
|                                                                            | Age               | 0.69             | 1.45       |
|                                                                            | Employment Status | 0.69             | 1.45       |
|                                                                            | Ed. Attainment    | 0.95             | 1.06       |
|                                                                            | TDI score         | 0.94             | 1.07       |
|                                                                            | Batch             | 0.99             | 1.01       |
|                                                                            | PC13              | 1.00             | 1.00       |
| Deletions (without 15q)                                                    | PS_Cog            | 0.94             | 1.06       |
|                                                                            | Ed. Attainment    | 0.96             | 1.04       |
|                                                                            | TDI score         | 0.94             | 1.06       |
|                                                                            | Assessment Centre | 0.95             | 1.05       |
|                                                                            | PC18              | 0.92             | 1.09       |
| All duplications                                                           | PS_Cog            | 0.99             | 1.01       |
|                                                                            | Employment Status | 0.96             | 1.04       |
|                                                                            | Ed. Attainment    | 0.94             | 1.07       |
|                                                                            | TDI score         | 0.97             | 1.04       |
|                                                                            | PC3               | 0.99             | 1.01       |
| Duplications (without 16p)                                                 | PS_Cog            | 0.99             | 1.01       |
|                                                                            | Ed. Attainment    | 0.99             | 1.01       |
|                                                                            | PC3               | 0.99             | 1.01       |
| 15q11.2 deletion                                                           | PS_Cog            | 0.98             | 1.02       |
|                                                                            | Ed. Attainment    | 0.99             | 1.01       |
|                                                                            | TDI score         | 0.98             | 1.02       |
|                                                                            | Batch             | 1.00             | 1.00       |
|                                                                            | PC13              | 0.99             | 1.01       |
|                                                                            | PC14              | 0.96             | 1.05       |
|                                                                            | PC18              | 0.96             | 1.04       |
| 16p13.11 duplication                                                       | PS_Cog            | 0.99             | 1.01       |
|                                                                            | Ed. Attainment    | 0.99             | 1.01       |
|                                                                            | TDI score         | 0.99             | 1.01       |
| Non-carriers                                                               | PS_Cog            | 0.97             | 1.04       |
|                                                                            | Age               | 0.62             | 1.62       |
|                                                                            | Sex (Male)        | 0.99             | 1.01       |
|                                                                            | Employment Status | 0.67             | 1.50       |
|                                                                            | Ed. Attainment    | 0.94             | 1.06       |
|                                                                            | TDI score         | 0.97             | 1.03       |
|                                                                            | Assessment Centre | 0.89             | 1.13       |
|                                                                            | PC3               | 0.95             | 1.05       |
|                                                                            | PC4               | 0.54             | 1.87       |
|                                                                            | PC5               | 0.57             | 1.74       |
|                                                                            | PC7               | 0.94             | 1.07       |
|                                                                            | PC9               | 0.94             | 1.06       |
|                                                                            | PC11              | 0.91             | 1.10       |
|                                                                            | PC14              | 0.95             | 1.05       |
|                                                                            | PC16              | 0.99             | 1.01       |
|                                                                            | PC19              | 1.00             | 1.00       |
| PC20                                                                       | 1.00              | 1.00             |            |

92 **Supplementary Table 6. Multicollinearity testing for cognition polygenic score linear**  
93 **regression models.** Variance inflation factors were calculated for each model to ensure no  
94 multicollinearity before and after backwards elimination of variables from each model. The  
95 VIFs displayed are for the final models for each cohort. A threshold of >3 was used to remove  
96 variables. VIFs were calculated using the *olsrr* package in R. Condition indices were also  
97 calculated and a threshold of >10 was used to remove variables. *VIF = variance inflation*  
98 *factor; PS\_Cog = cognition polygenic score.*

99



| <b>Supplementary Table 7   Multicollinearity testing for PS_EA models</b> |                   |                  |            |
|---------------------------------------------------------------------------|-------------------|------------------|------------|
| <b>Cohort</b>                                                             | <b>Variable</b>   | <b>Tolerance</b> | <b>VIF</b> |
| All ND-CNV carriers                                                       | PS_EA             | 1.00             | 1.00       |
|                                                                           | TDI score         | 0.99             | 1.01       |
|                                                                           | Employment Status | 0.99             | 1.01       |
|                                                                           | Batch             | 1.00             | 1.00       |
|                                                                           | PC1               | 1.00             | 1.00       |
| ND-CNV (without 15q/16p)                                                  | PS_EA             | 0.99             | 1.01       |
|                                                                           | TDI score         | 0.99             | 1.01       |
|                                                                           | Employment Status | 0.99             | 1.01       |
|                                                                           | PC3               | 1.00             | 1.00       |
| All deletions                                                             | PS_EA             | 0.99             | 1.01       |
|                                                                           | TDI score         | 0.98             | 1.02       |
|                                                                           | Employment Status | 0.99             | 1.01       |
|                                                                           | Batch             | 1.00             | 1.00       |
|                                                                           | PC13              | 1.00             | 1.00       |
| Deletions (without 15q)                                                   | PS_EA             | 1.00             | 1.00       |
|                                                                           | TDI score         | 0.99             | 1.01       |
|                                                                           | PC13              | 0.99             | 1.01       |
| All duplications                                                          | PS_EA             | 1.00             | 1.00       |
|                                                                           | TDI score         | 1.00             | 1.00       |
|                                                                           | Employment Status | 0.99             | 1.01       |
| Duplications (without 16p)                                                | PS_EA             | 0.99             | 1.01       |
|                                                                           | TDI score         | 0.98             | 1.02       |
|                                                                           | Employment Status | 0.98             | 1.03       |
|                                                                           | PC3               | 1.00             | 1.00       |
| 15q11.2 deletion                                                          | PS_EA             | 0.97             | 1.03       |
|                                                                           | TDI score         | 0.96             | 1.04       |
|                                                                           | Employment Status | 0.98             | 1.02       |
|                                                                           | Batch             | 1.00             | 1.00       |
|                                                                           | PC14              | 0.95             | 1.05       |
|                                                                           | PC18              | 0.96             | 1.04       |
| 16p13.11 duplication                                                      | PS_EA             | 0.99             | 1.01       |
|                                                                           | TDI score         | 1.00             | 1.00       |
|                                                                           | Employment Status | 0.99             | 1.01       |
| Non-carriers                                                              | PS_EA             | 0.98             | 1.10       |
|                                                                           | Age               | 0.62             | 1.61       |
|                                                                           | Sex (Male)        | 1.00             | 1.00       |
|                                                                           | TDI score         | 0.98             | 1.02       |
|                                                                           | Employment Status | 0.67             | 1.49       |
|                                                                           | Assessment Centre | 0.90             | 1.11       |
|                                                                           | PC3               | 0.95             | 1.05       |
|                                                                           | PC4               | 0.54             | 1.87       |
|                                                                           | PC5               | 0.59             | 1.72       |
|                                                                           | PC7               | 0.97             | 1.04       |
|                                                                           | PC11              | 0.91             | 1.10       |
|                                                                           | PC14              | 0.95             | 1.06       |
|                                                                           | PC16              | 0.99             | 1.00       |
|                                                                           | PC18              | 0.99             | 1.01       |
|                                                                           | PC19              | 1.00             | 1.00       |
| PC20                                                                      | 0.99              | 1.01             |            |

101 ***Supplementary Table 7. Multicollinearity testing for educational attainment polygenic score***  
102 ***linear regression models.*** Variance inflation factors were calculated for each model to ensure  
103 no multicollinearity before and after backwards elimination of variables from each model.  
104 The VIFs displayed are for the final models for each cohort. A threshold of >3 was used to  
105 remove variables. VIFs were calculated using the *olsrr* package in R. Condition indices were  
106 also calculated and a threshold of >10 was used to remove variables. *VIF = variance inflation*  
107 *factor; PS\_EA = educational attainment polygenic score.*

108

| <b>Supplementary Table 8   Multicollinearity testing for PS_ASD models</b> |                   |                  |            |
|----------------------------------------------------------------------------|-------------------|------------------|------------|
| <b>Cohort</b>                                                              | <b>Variable</b>   | <b>Tolerance</b> | <b>VIF</b> |
| All ND-CNV carriers                                                        | PS_ASD            | 1.00             | 1.00       |
|                                                                            | Employment Status | 0.96             | 1.04       |
|                                                                            | Ed. Attainment    | 0.95             | 1.05       |
|                                                                            | TDI score         | 0.98             | 1.03       |
|                                                                            | Batch             | 1.00             | 1.00       |
| ND-CNV (without 15q/16p)                                                   | PS_ASD            | 0.99             | 1.01       |
|                                                                            | Ed. Attainment    | 0.95             | 1.06       |
|                                                                            | TDI score         | 0.95             | 1.06       |
|                                                                            | PC3               | 0.99             | 1.01       |
| All deletions                                                              | PS_ASD            | 0.99             | 1.01       |
|                                                                            | Age               | 0.95             | 1.05       |
|                                                                            | Ed. Attainment    | 0.96             | 1.04       |
|                                                                            | TDI score         | 0.96             | 1.04       |
|                                                                            | Batch             | 1.00             | 1.00       |
|                                                                            | PC13              | 0.99             | 1.01       |
| Deletions (without 15q)                                                    | PS_ASD            | 0.99             | 1.01       |
|                                                                            | Ed. Attainment    | 0.97             | 1.03       |
|                                                                            | TDI score         | 0.96             | 1.04       |
|                                                                            | Assessment Centre | 0.95             | 1.05       |
|                                                                            | PC18              | 0.95             | 1.05       |
| All duplications                                                           | PS_ASD            | 1.00             | 1.00       |
|                                                                            | Employment Status | 0.96             | 1.04       |
|                                                                            | Ed. Attainment    | 0.94             | 1.07       |
|                                                                            | TDI score         | 0.97             | 1.04       |
|                                                                            | PC3               | 0.99             | 1.01       |
| Duplications (without 16p)                                                 | PS_ASD            | 1.00             | 1.00       |
|                                                                            | Ed. Attainment    | 0.99             | 1.01       |
|                                                                            | PC3               | 0.99             | 1.01       |
| 15q11.2 deletion                                                           | PS_ASD            | 0.98             | 1.02       |
|                                                                            | Ed. Attainment    | 0.99             | 1.01       |
|                                                                            | TDI score         | 0.98             | 1.02       |
|                                                                            | Batch             | 0.99             | 1.01       |
|                                                                            | PC13              | 0.99             | 1.01       |
|                                                                            | PC14              | 0.96             | 1.04       |
|                                                                            | PC18              | 0.96             | 1.04       |
| 16p13.11 duplication                                                       | PS_ASD            | 1.00             | 1.00       |
|                                                                            | Ed. Attainment    | 0.99             | 1.01       |
|                                                                            | TDI score         | 0.99             | 1.01       |
| Non-carriers                                                               | PS_ASD            | 1.00             | 1.00       |
|                                                                            | Age               | 0.62             | 1.62       |
|                                                                            | Sex (Male)        | 0.99             | 1.01       |
|                                                                            | Employment Status | 0.67             | 1.50       |
|                                                                            | Ed. Attainment    | 0.95             | 1.06       |
|                                                                            | TDI score         | 0.97             | 1.03       |
|                                                                            | Assessment Centre | 0.89             | 1.13       |
|                                                                            | PC3               | 0.95             | 1.05       |
|                                                                            | PC4               | 0.53             | 1.87       |
|                                                                            | PC5               | 0.55             | 1.81       |
|                                                                            | PC7               | 0.92             | 1.08       |
|                                                                            | PC8               | 0.84             | 1.19       |
|                                                                            | PC9               | 0.94             | 1.07       |
|                                                                            | PC11              | 0.84             | 1.19       |
|                                                                            | PC14              | 0.94             | 1.06       |
|                                                                            | PC16              | 0.98             | 1.01       |
|                                                                            | PC17              | 1.00             | 1.00       |
|                                                                            | PC18              | 0.99             | 1.01       |
|                                                                            | PC19              | 1.00             | 1.00       |
|                                                                            | PC20              | 0.99             | 1.01       |

110 **Supplementary Table 8. Multicollinearity testing for autism polygenic score linear**  
111 **regression models.** Variance inflation factors were calculated for each model to ensure no  
112 multicollinearity before and after backwards elimination of variables from each model. The  
113 VIFs displayed are for the final models for each cohort. A threshold of >3 was used to remove  
114 variables. VIFs were calculated using the *olsrr* package in R. Condition indices were also  
115 calculated and a threshold of >10 was used to remove variables. *VIF = variance inflation*  
116 *factor; PS\_ASD = autism polygenic score.*

117

| Supplementary Table 9   Relationship between FI scores and PGS in ND-CNV carriers (excluding 16p11.13 dup. & 15q11.2 del.) |          |           |          |                           |                              |                                                 |                                                |
|----------------------------------------------------------------------------------------------------------------------------|----------|-----------|----------|---------------------------|------------------------------|-------------------------------------------------|------------------------------------------------|
| <u>ND-CNV Cohort</u>                                                                                                       | <u>n</u> | <u>IV</u> | <u>β</u> | <u>Adj. R<sup>2</sup></u> | <u>P</u>                     | <u>Cohen's f<sup>2</sup></u><br><u>(Global)</u> | <u>Cohen's f<sup>2</sup></u><br><u>(Local)</u> |
| All ND-CNV carriers (excluding 16p11.3 dup. & 15q11.2 del. )                                                               | 503      | PS_Cog    | 0.1      | 0.20                      | 0.02                         | -                                               | -                                              |
|                                                                                                                            |          | PS_EA     | 0.14     | 0.09                      | <b>1.04x10<sup>-3*</sup></b> | 0.10                                            | 0.03                                           |
|                                                                                                                            |          | PS_ASD    | -0.01    | 0.19                      | 0.84                         | -                                               | -                                              |
| All Del. Carriers (excluding 15q11.2 del.)                                                                                 | 220      | PS_Cog    | 0.04     | 0.29                      | 0.51                         | -                                               | -                                              |
|                                                                                                                            |          | PS_EA     | 0.17     | 0.10                      | <b>8.54x10<sup>-3*</sup></b> | 0.11                                            | 0.03                                           |
|                                                                                                                            |          | PS_ASD    | -0.03    | 0.13                      | 0.57                         | -                                               | -                                              |
| All Dup. Carriers (excluding 16p11.13 dup.)                                                                                | 286      | PS_Cog    | 0.11     | 0.14                      | 0.05                         | -                                               | -                                              |
|                                                                                                                            |          | PS_EA     | 0.13     | 0.13                      | 0.02                         | -                                               | -                                              |
|                                                                                                                            |          | PS_ASD    | 0.01     | 0.29                      | 0.83                         | -                                               | -                                              |

118

119 **Supplementary Table 9. Relationship between FI scores and rare variants in ND-CNV carriers and non-carriers (excluding 16p13.11 dup. &**  
120 **15q11.2 del.).** All analyses were adjusted for covariates (Methods) and only covariates with significant associations were retained. The standard  
121 β estimates are reported along with the adjusted (adj.) R<sup>2</sup> from multiple linear regression. IV = independent variable.

**Supplementary Table 10. I Relationship between FI scores and PGS in ND-CNV carriers and non-carriers (excluding educational attainment covariate)**

| <u>ND-CNV Cohort</u>                                         | <i>n</i> | <i>IV</i> | <i>β</i>              | <i>Adj. R<sup>2</sup></i> | <i>P</i>                           | <i>Cohen's f<sup>2</sup></i><br>(Global) | <i>Cohen's f<sup>2</sup></i><br>(Local) |
|--------------------------------------------------------------|----------|-----------|-----------------------|---------------------------|------------------------------------|------------------------------------------|-----------------------------------------|
| All ND-CNV carriers                                          | 1,317    | PS_Cog    | 0.17                  | 0.08                      | <b>5.29x10<sup>-8*</sup></b>       | 0.08                                     | 0.02                                    |
|                                                              |          | PS_ASD    | 0.01                  | 0.06                      | 0.74                               | -                                        | -                                       |
| All Del. Carriers                                            | 764      | PS_Cog    | 0.15                  | 0.09                      | <b>8.29x10<sup>-6*</sup></b>       | 0.10                                     | 0.03                                    |
|                                                              |          | PS_ASD    | 0.01                  | 0.06                      | 0.68                               | -                                        | -                                       |
| All Dup. Carriers                                            | 561      | PS_Cog    | 0.13                  | 0.08                      | <b>1.15x10<sup>-3*</sup></b>       | 0.09                                     | 0.02                                    |
|                                                              |          | PS_ASD    | 2.49x10 <sup>-3</sup> | 0.06                      | 0.95                               | -                                        | -                                       |
| 15q11.2 del.                                                 | 543      | PS_Cog    | 0.20                  | 0.10                      | <b>2.48x10<sup>-6*</sup></b>       | 0.12                                     | 0.04                                    |
|                                                              |          | PS_ASD    | -0.01                 | 0.07                      | 0.84                               | -                                        | -                                       |
| 16p13.11 dup.                                                | 275      | PS_Cog    | 0.12                  | 0.05                      | 0.04                               | 0.05                                     | 0.01                                    |
|                                                              |          | PS_ASD    | 0.04                  | 0.04                      | 0.49                               | -                                        | -                                       |
| All ND-CNV carriers (excluding 15q11.2 del. & 16p13.11 dup.) | 503      | PS_Cog    | 0.12                  | 0.07                      | 4.79x10 <sup>-3*</sup>             | 0.08                                     | 0.01                                    |
|                                                              |          | PS_ASD    | 2.98x10 <sup>-3</sup> | 0.07                      | 0.94                               | -                                        | -                                       |
| Deletion carriers (excluding 15q11.2 del.)                   | 220      | PS_Cog    | 0.10                  | 0.07                      | 0.11                               | -                                        | -                                       |
|                                                              |          | PS_ASD    | 0.03                  | 0.06                      | 0.65                               | -                                        | -                                       |
| Duplication carriers (excluding 16p11.13 dup.)               | 286      | PS_Cog    | 0.13                  | 0.03                      | 0.03                               | -                                        | -                                       |
|                                                              |          | PS_ASD    | -0.03                 | 0.15                      | 0.61                               | -                                        | -                                       |
| Non-carriers                                                 | 152,290  | PS_Cog    | 0.13                  | 0.05                      | <b>&lt; 2.00x10<sup>-16*</sup></b> | 0.05                                     | 0.02                                    |
|                                                              |          | PS_ASD    | 0.02                  | 0.03                      | <b>1.50x10<sup>-12*</sup></b>      | 0.02                                     | 3.19x10 <sup>-4</sup>                   |

123 **Supplementary Table 10. Relationship between *FI* scores and PGS in ND-CNV carriers and non-carriers (excluding Ed. attainment covariate).**

124 All analyses were adjusted for covariates (Methods; excluding ed. attainment) and only covariates with significant associations were retained.

125 Seven individuals carried both a deletion and duplication of which four carried both 15q11.2 del. and 16p13.11 dup. All ND-CNV carriers includes

126 carriers of 15q11.2 del. and 16p13.11 dup as well as other loci (See Supplementary Table 5.). The standard  $\beta$  estimates are reported along with

127 the adjusted (adj.)  $R^2$  from multiple linear regression. Both the global and local *Cohen's  $f^2$*  are reported for significant p-values. The local *Cohen's*

128  *$f^2$*  is only calculated for IVs. \* = P-values that survived Bonferroni correction for 18 analyses (two PGS and nine sub-groups;  $p < 2.78 \times 10^{-3}$ ). IV =

129 *independent variable.*

| <b>Supplementary Table 11.   Relationship between fluid intelligence (FI) scores and rare variants in ND-CNV carriers and non-carriers</b> |                 |                  |                             |                        |                                  |                              |
|--------------------------------------------------------------------------------------------------------------------------------------------|-----------------|------------------|-----------------------------|------------------------|----------------------------------|------------------------------|
| <b>ND-CNV Cohort</b>                                                                                                                       | <b><i>n</i></b> | <b><i>IV</i></b> | <b><i>n RV carriers</i></b> | <b><i>β</i></b>        | <b><i>Adj. R<sup>2</sup></i></b> | <b><i>P</i></b>              |
| All ND-CNV carriers                                                                                                                        | 1,274           | DDD              | 310                         | -3.58x10 <sup>-3</sup> | 0.16                             | 0.89                         |
|                                                                                                                                            |                 | SFARI            | 198                         | 0.02                   | 0.16                             | 0.37                         |
|                                                                                                                                            |                 | LOF              | 925                         | -0.03                  | 0.16                             | 0.15                         |
| All Deletion carriers                                                                                                                      | 739             | DDD              | 167                         | -6.88x10 <sup>-3</sup> | 0.16                             | 0.84                         |
|                                                                                                                                            |                 | SFARI            | 114                         | 0.03                   | 0.15                             | 0.41                         |
|                                                                                                                                            |                 | LOF              | 534                         | -0.04                  | 0.16                             | 0.20                         |
| All Duplication carriers                                                                                                                   | 542             | DDD              | 146                         | -4.43x10 <sup>-3</sup> | 0.17                             | 0.91                         |
|                                                                                                                                            |                 | SFARI            | 87                          | 0.02                   | 0.17                             | 0.58                         |
|                                                                                                                                            |                 | LOF              | 396                         | -0.03                  | 0.17                             | 0.51                         |
| 15q11.2 del.                                                                                                                               | 523             | DDD              | 114                         | -0.04                  | 0.14                             | 0.33                         |
|                                                                                                                                            |                 | SFARI            | 80                          | -2.60x10 <sup>-3</sup> | 0.14                             | 0.94                         |
|                                                                                                                                            |                 | LOF              | 378                         | -0.01                  | 0.14                             | 0.70                         |
| 16p13.11 dup.                                                                                                                              | 267             | DDD              | 63                          | -0.17                  | 0.19                             | 0.11                         |
|                                                                                                                                            |                 | SFARI            | 44                          | 0.01                   | 0.18                             | 0.82                         |
|                                                                                                                                            |                 | LOF              | 182                         | 0.01                   | 0.18                             | 0.87                         |
| All ND-CNV carriers (excluding 15q11.2 del. & 16p13.11 dup.)                                                                               | 488             | DDD              | 134                         | 0.09                   | 0.21                             | 0.03                         |
|                                                                                                                                            |                 | SFARI            | 76                          | 0.05                   | 0.20                             | 0.22                         |
|                                                                                                                                            |                 | LOF              | 358                         | -0.07                  | 0.20                             | 0.09                         |
| Deletion carriers (excluding 15q11.2 del.)                                                                                                 | 216             | DDD              | 53                          | 0.09                   | 0.31                             | 0.12                         |
|                                                                                                                                            |                 | SFARI            | 34                          | 0.08                   | 0.30                             | 0.17                         |
|                                                                                                                                            |                 | LOF              | 156                         | -0.08                  | 0.31                             | 0.13                         |
| Duplication carriers (excluding 16p11.13 dup.)                                                                                             | 275             | DDD              | 83                          | 0.08                   | 0.14                             | 0.13                         |
|                                                                                                                                            |                 | SFARI            | 43                          | 0.02                   | 0.13                             | 0.67                         |
|                                                                                                                                            |                 | LOF              | 204                         | -0.05                  | 0.13                             | 0.41                         |
| Non-carriers                                                                                                                               | 146,859         | DDD              | 37,321                      | -9.69x10 <sup>-4</sup> | 0.15                             | 0.95                         |
|                                                                                                                                            |                 | SFARI            | 24,885                      | 3.32x10 <sup>-4</sup>  | 0.15                             | 0.89                         |
|                                                                                                                                            |                 | LOF              | 106,082                     | -6.26x10 <sup>-3</sup> | 0.15                             | <b>9.51x10<sup>-3*</sup></b> |

130

131 **Supplementary Table 11. Relationship between FI scores and rare variants in ND-CNV**

132 **carriers and non-carriers.** All analyses were adjusted for covariates (Methods) and only

133 covariates with significant associations were retained. Seven individuals carried both a

134 deletion and duplication of which four individuals carried both 15q11.2 del. and 16p13.11

135 dup. and were included in both analyses. All ND-CNV carriers includes carriers of 15q11.2 del.

136 and 16p13.11 dup as well as other loci (See Supplementary Table 4.). The standard  $\beta$

137 estimates are reported along with the adjusted (adj.)  $R^2$  from multiple linear regression. P-

138 values which passed Bonferroni correction are highlighted in bold with a star. Global and local



139 *Cohen's  $f^2$*  estimates for LOF were 0.17 and  $1.17 \times 10^{-4}$ , respectively. *IV = independent variable.*

140 *N RV carriers = no. of participants that carried >1 rare variant.*

141

142

143

| <b>Supplementary Table 12   Multicollinearity testing for SFARI models</b> |                   |                  |            |
|----------------------------------------------------------------------------|-------------------|------------------|------------|
| <b>Cohort</b>                                                              | <b>Variable</b>   | <b>Tolerance</b> | <b>VIF</b> |
| All ND-CNV carriers                                                        | SFARI             | 1.00             | 1.00       |
|                                                                            | Ed. Attainment    | 0.98             | 1.02       |
|                                                                            | TDI score         | 0.98             | 1.02       |
| ND-CNV (without 15q/16p)                                                   | SFARI             | 1.00             | 1.00       |
|                                                                            | Ed. Attainment    | 0.92             | 1.06       |
|                                                                            | TDI score         | 0.92             | 1.06       |
|                                                                            | PC3               | 1.00             | 1.00       |
| All deletions                                                              | SFARI             | 1.00             | 1.00       |
|                                                                            | Ed. Attainment    | 0.99             | 1.01       |
|                                                                            | TDI score         | 0.99             | 1.01       |
| Deletions (without 15q)                                                    | SFARI             | 0.99             | 1.01       |
|                                                                            | Ed. Attainment    | 0.97             | 1.03       |
|                                                                            | TDI score         | 0.96             | 1.04       |
|                                                                            | Assessment Centre | 0.95             | 1.05       |
|                                                                            | PC18              | 0.95             | 1.06       |
| All duplications                                                           | SFARI             | 1.00             | 1.00       |
|                                                                            | Employment Status | 0.96             | 1.04       |
|                                                                            | Ed. Attainment    | 0.96             | 1.04       |
|                                                                            | TDI score         | 1.00             | 1.00       |
| Duplications (without 16p)                                                 | SFARI             | 1.00             | 1.00       |
|                                                                            | Ed. Attainment    | 0.99             | 1.01       |
|                                                                            | PC3               | 1.00             | 1.00       |
| 15q11.2 deletion                                                           | SFARI             | 0.99             | 1.01       |
|                                                                            | Ed. Attainment    | 0.99             | 1.01       |
|                                                                            | TDI score         | 0.99             | 1.01       |
|                                                                            | PC4               | 0.96             | 1.04       |
|                                                                            | PC13              | 0.99             | 1.01       |
|                                                                            | PC14              | 0.93             | 1.07       |
|                                                                            | PC18              | 0.95             | 1.05       |
| 16p13.11 duplication                                                       | SFARI             | 1.00             | 1.00       |
|                                                                            | Ed. Attainment    | 0.99             | 1.01       |
|                                                                            | PC3               | 0.99             | 1.01       |
| Non-carriers                                                               | SFARI             | 1.00             | 1.00       |
|                                                                            | Age               | 0.62             | 1.62       |
|                                                                            | Sex (Male)        | 0.99             | 1.01       |
|                                                                            | Employment Status | 0.67             | 1.50       |
|                                                                            | Ed. Attainment    | 0.95             | 1.06       |
|                                                                            | TDI score         | 0.97             | 1.03       |
|                                                                            | Assessment Centre | 0.89             | 1.13       |
|                                                                            | PC3               | 0.95             | 1.05       |
|                                                                            | PC4               | 0.53             | 1.87       |
|                                                                            | PC5               | 0.55             | 1.81       |
|                                                                            | PC7               | 0.92             | 1.08       |
|                                                                            | PC8               | 0.84             | 1.19       |
|                                                                            | PC9               | 0.94             | 1.07       |
|                                                                            | PC11              | 0.84             | 1.19       |
|                                                                            | PC14              | 0.94             | 1.06       |
|                                                                            | PC16              | 0.99             | 1.01       |
| PC18                                                                       | 0.99              | 1.01             |            |
| PC19                                                                       | 1.00              | 1.00             |            |
| PC20                                                                       | 1.00              | 1.00             |            |

145 **Supplementary Table 12. Multicollinearity testing for SFARI rare variants linear regression**  
146 **models.** Variance inflation factors were calculated for each model to ensure no  
147 multicollinearity before and after backwards elimination of variables from each model. The  
148 VIFs displayed are for the final models for each cohort. A threshold of >3 was used to remove  
149 variables. VIFs were calculated using the *olsrr* package in R. Condition indices were also  
150 calculated and a threshold of >10 was used to remove variables. *VIF = variance inflation*  
151 *factor; SFARI = autism associated rare variants with SFARI scores of 1.*

152

| <b>Supplementary Table 13   Multicollinearity testing for DDD models</b> |                   |                  |            |
|--------------------------------------------------------------------------|-------------------|------------------|------------|
| <b>Cohort</b>                                                            | <b>Variable</b>   | <b>Tolerance</b> | <b>VIF</b> |
| All ND-CNV carriers                                                      | DDD               | 1.00             | 1.00       |
|                                                                          | Ed. Attainment    | 0.98             | 1.02       |
|                                                                          | TDI score         | 0.98             | 1.02       |
| ND-CNV (without 15q/16p)                                                 | DDD               | 1.00             | 1.00       |
|                                                                          | Ed. Attainment    | 0.94             | 1.06       |
|                                                                          | TDI score         | 0.94             | 1.06       |
|                                                                          | PC3               | 1.00             | 1.00       |
|                                                                          | PC18              | 1.00             | 1.00       |
| All deletions                                                            | DDD               | 1.00             | 1.00       |
|                                                                          | Ed. Attainment    | 0.99             | 1.01       |
|                                                                          | TDI score         | 0.99             | 1.01       |
|                                                                          | PC13              | 1.00             | 1.00       |
|                                                                          | PC19              | 1.00             | 1.00       |
| Deletions (without 15q)                                                  | DDD               | 0.98             | 1.02       |
|                                                                          | Ed. Attainment    | 0.97             | 1.03       |
|                                                                          | TDI score         | 0.96             | 1.05       |
|                                                                          | Assessment Centre | 0.95             | 1.06       |
|                                                                          | PC18              | 0.95             | 1.05       |
| All duplications                                                         | DDD               | 1.00             | 1.00       |
|                                                                          | Ed. Attainment    | 0.96             | 1.04       |
|                                                                          | TDI score         | 0.96             | 1.04       |
|                                                                          | PC3               | 1.00             | 1.00       |
| Duplications (without 16p)                                               | DDD               | 1.00             | 1.00       |
|                                                                          | Ed. Attainment    | 1.00             | 1.00       |
|                                                                          | PC3               | 1.00             | 1.00       |
| 15q11.2 deletion                                                         | DDD               | 0.99             | 1.01       |
|                                                                          | Ed. Attainment    | 0.99             | 1.01       |
|                                                                          | TDI score         | 0.99             | 1.01       |
|                                                                          | PC4               | 0.96             | 1.04       |
|                                                                          | PC13              | 0.99             | 1.01       |
|                                                                          | PC14              | 0.93             | 1.08       |
| 16p13.11 duplication                                                     | DDD               | 1.00             | 1.00       |
|                                                                          | Ed. Attainment    | 0.99             | 1.01       |
|                                                                          | TDI score         | 0.99             | 1.01       |
| Non-carriers                                                             | DDD               | 0.99             | 1.00       |
|                                                                          | Age               | 0.62             | 1.62       |
|                                                                          | Sex (Male)        | 0.99             | 1.01       |
|                                                                          | Employment Status | 0.67             | 1.50       |
|                                                                          | Ed. Attainment    | 0.95             | 1.06       |
|                                                                          | TDI score         | 0.97             | 1.03       |
|                                                                          | Assessment Centre | 0.88             | 1.13       |
|                                                                          | PC3               | 0.95             | 1.05       |
|                                                                          | PC4               | 0.54             | 1.87       |
|                                                                          | PC5               | 0.56             | 1.77       |
|                                                                          | PC7               | 0.95             | 1.06       |
|                                                                          | PC8               | 0.85             | 1.18       |
|                                                                          | PC11              | 0.84             | 1.19       |
|                                                                          | PC14              | 0.94             | 1.06       |
|                                                                          | PC16              | 1.00             | 1.00       |
|                                                                          | PC17              | 1.00             | 1.00       |
|                                                                          | PC18              | 0.99             | 1.01       |
| PC19                                                                     | 1.00              | 1.00             |            |
| PC20                                                                     | 0.99              | 1.01             |            |

154 **Supplementary Table 13. Multicollinearity testing for DDD rare variant linear regression**  
155 **models.** Variance inflation factors were calculated for each model to ensure no  
156 multicollinearity before and after backwards elimination of variables from each model. The  
157 VIFs displayed are for the final models for each cohort. A threshold of >3 was used to remove  
158 variables. VIFs were calculated using the *olsrr* package in R. Condition indices were also  
159 calculated and a threshold of >10 was used to remove variables. *VIF = variance inflation*  
160 *factor; DDD = ID/DD associated rare variants with DDD confirmed scores.*

161

| <b>Supplementary Table 14   Multicollinearity testing for LOF models</b> |                   |                  |            |
|--------------------------------------------------------------------------|-------------------|------------------|------------|
| <b>Cohort</b>                                                            | <b>Variable</b>   | <b>Tolerance</b> | <b>VIF</b> |
| All ND-CNV carriers                                                      | LOF               | 0.99             | 1.00       |
|                                                                          | Ed. Attainment    | 0.98             | 1.02       |
|                                                                          | TDI score         | 0.98             | 1.02       |
| ND-CNV (without 15q/16p)                                                 | LOF               | 0.98             | 1.02       |
|                                                                          | Ed. Attainment    | 0.94             | 1.06       |
|                                                                          | TDI score         | 0.94             | 1.06       |
|                                                                          | PC3               | 0.98             | 1.02       |
| All deletions                                                            | LOF               | 1.00             | 1.00       |
|                                                                          | Ed. Attainment    | 0.99             | 1.01       |
|                                                                          | TDI score         | 0.99             | 1.01       |
|                                                                          | PC13              | 1.00             | 1.00       |
| Deletions (without 15q)                                                  | LOF               | 0.98             | 1.00       |
|                                                                          | Ed. Attainment    | 0.97             | 1.03       |
|                                                                          | TDI score         | 0.96             | 1.04       |
|                                                                          | Assessment Centre | 0.95             | 1.05       |
|                                                                          | PC18              | 0.93             | 1.07       |
| All duplications                                                         | LOF               | 1.00             | 1.00       |
|                                                                          | Ed. Attainment    | 0.97             | 1.04       |
|                                                                          | TDI score         | 0.96             | 1.04       |
|                                                                          | PC18              | 1.00             | 1.00       |
| Duplications (without 16p)                                               | LOF               | 0.98             | 1.02       |
|                                                                          | Ed. Attainment    | 0.99             | 1.01       |
|                                                                          | PC3               | 0.98             | 1.02       |
| 15q11.2 deletion                                                         | LOF               | 0.99             | 1.01       |
|                                                                          | Ed. Attainment    | 0.99             | 1.01       |
|                                                                          | TDI score         | 0.98             | 1.02       |
|                                                                          | PC4               | 0.96             | 1.04       |
|                                                                          | PC13              | 0.99             | 1.01       |
|                                                                          | PC14              | 0.93             | 1.08       |
|                                                                          | PC18              | 0.95             | 1.05       |
| 16p13.11 duplication                                                     | LOF               | 1.00             | 1.00       |
|                                                                          | Ed. Attainment    | 0.99             | 1.01       |
|                                                                          | TDI score         | 0.99             | 1.01       |
| Non-carriers                                                             | LOF               | 1.00             | 1.00       |
|                                                                          | Age               | 0.62             | 1.62       |
|                                                                          | Sex (Male)        | 0.99             | 1.01       |
|                                                                          | Employment Status | 0.67             | 1.50       |
|                                                                          | Ed. Attainment    | 0.95             | 1.06       |
|                                                                          | TDI score         | 0.97             | 1.03       |
|                                                                          | Assessment Centre | 0.89             | 1.13       |
|                                                                          | PC3               | 0.95             | 1.05       |
|                                                                          | PC4               | 0.54             | 1.87       |
|                                                                          | PC5               | 0.56             | 1.77       |
|                                                                          | PC7               | 0.95             | 1.06       |
|                                                                          | PC8               | 0.85             | 1.18       |
|                                                                          | PC11              | 0.84             | 1.19       |
|                                                                          | PC14              | 0.94             | 1.06       |
|                                                                          | PC16              | 1.00             | 1.00       |
|                                                                          | PC17              | 1.00             | 1.00       |
| PC18                                                                     | 0.99              | 1.01             |            |
| PC19                                                                     | 1.00              | 1.00             |            |
| PC20                                                                     | 0.99              | 1.01             |            |

163 **Supplementary Table 14. Multicollinearity testing for autism polygenic score linear**  
164 **regression models.** Variance inflation factors were calculated for each model to ensure no  
165 multicollinearity before and after backwards elimination of variables from each model. The  
166 VIFs displayed are for the final models for each cohort. A threshold of >3 was used to remove  
167 variables. VIFs were calculated using the *olsrr* package in R. Condition indices were also  
168 calculated and a threshold of >10 was used to remove variables. *VIF = variance inflation*  
169 *factor; LOF = rare variants in brain-expressed, intolerant to loss-of-function loci.*

170

| <b>Supplementary Table 15. I Relationship between fluid intelligence (FI) scores and rare variants in ND-CNV carriers and non-carriers (excluding ed. attainment covariate)</b> |                 |                  |                             |                           |                                  |                         |
|---------------------------------------------------------------------------------------------------------------------------------------------------------------------------------|-----------------|------------------|-----------------------------|---------------------------|----------------------------------|-------------------------|
| <b>ND-CNV Cohort</b>                                                                                                                                                            | <b><i>n</i></b> | <b><i>IV</i></b> | <b><i>n RV carriers</i></b> | <b><math>\beta</math></b> | <b><i>Adj. R<sup>2</sup></i></b> | <b><i>P</i></b>         |
| All ND-CNV carriers                                                                                                                                                             | 1,274           | DDD              | 310                         | -0.20                     | 0.05                             | 0.92                    |
|                                                                                                                                                                                 |                 | SFARI            | 198                         | 0.04                      | 0.05                             | 0.14                    |
|                                                                                                                                                                                 |                 | LOF              | 925                         | -0.03                     | 0.05                             | 0.29                    |
| All Deletion carriers                                                                                                                                                           | 739             | DDD              | 167                         | $4.07 \times 10^{-3}$     | 0.05                             | 0.91                    |
|                                                                                                                                                                                 |                 | SFARI            | 114                         | 0.04                      | 0.05                             | 0.29                    |
|                                                                                                                                                                                 |                 | L.O.F            | 534                         | -0.03                     | 0.04                             | 0.35                    |
| All Duplication carriers                                                                                                                                                        | 542             | DDD              | 146                         | $-9.54 \times 10^{-3}$    | 0.06                             | 0.82                    |
|                                                                                                                                                                                 |                 | SFARI            | 87                          | 0.04                      | 0.06                             | 0.40                    |
|                                                                                                                                                                                 |                 | LOF              | 396                         | -0.03                     | 0.06                             | 0.52                    |
| 15q11.2 del.                                                                                                                                                                    | 523             | DDD              | 114                         | -0.02                     | 0.05                             | 0.64                    |
|                                                                                                                                                                                 |                 | SFARI            | 80                          | 0.02                      | 0.06                             | 0.69                    |
|                                                                                                                                                                                 |                 | LOF              | 378                         | $4.57 \times 10^{-3}$     | 0.06                             | 0.91                    |
| 16p13.11 dup.                                                                                                                                                                   | 267             | DDD              | 63                          | -0.09                     | 0.06                             | 0.13                    |
|                                                                                                                                                                                 |                 | SFARI            | 44                          | 0.02                      | 0.04                             | 0.70                    |
|                                                                                                                                                                                 |                 | LOF              | 182                         | 0.03                      | 0.04                             | 0.62                    |
| All ND-CNV carriers (excluding 15q11.2 del. & 16p13.11 dup.)                                                                                                                    | 488             | DDD              | 134                         | 0.07                      | 0.07                             | 0.10                    |
|                                                                                                                                                                                 |                 | SFARI            | 76                          | 0.07                      | 0.06                             | 0.10                    |
|                                                                                                                                                                                 |                 | LOF              | 358                         | -0.08                     | 0.07                             | 0.07                    |
| Deletion carriers (excluding 15q11.2 del.)                                                                                                                                      | 216             | DDD              | 53                          | 0.06                      | 0.05                             | 0.35                    |
|                                                                                                                                                                                 |                 | SFARI            | 34                          | 0.11                      | 0.06                             | 0.09                    |
|                                                                                                                                                                                 |                 | LOF              | 156                         | -0.11                     | 0.07                             | 0.09                    |
| Duplication carriers (excluding 16p11.13 dup.)                                                                                                                                  | 275             | DDD              | 83                          | 0.08                      | 0.08                             | 0.18                    |
|                                                                                                                                                                                 |                 | SFARI            | 43                          | 0.04                      | 0.07                             | 0.45                    |
|                                                                                                                                                                                 |                 | LOF              | 204                         | -0.11                     | 0.07                             | 0.09                    |
| Non-carriers                                                                                                                                                                    | 146,859         | DDD              | 37,321                      | $-1.85 \times 10^{-4}$    | 0.03                             | 0.94                    |
|                                                                                                                                                                                 |                 | SFARI            | 24,885                      | $2.22 \times 10^{-4}$     | 0.03                             | 0.93                    |
|                                                                                                                                                                                 |                 | LOF              | 106,082                     | -0.01                     | 0.03                             | $2.22 \times 10^{-4}$ * |

171

172 **Supplementary Table 15. Relationship between FI scores and rare variants in ND-CNV**173 **carriers and non-carriers (excluding Ed. Attainment covariate).** All analyses were adjusted

174 for covariates (Methods; excluding ed. attainment) and only covariates with significant

175 associations were retained. Seven individuals carried both a deletion and duplication of which

176 four individuals carried both 15q11.2 del. and 16p13.11 dup. and were included in both

177 analyses. All ND-CNV carriers includes carriers of 15q11.2 del. and 16p13.11 dup as well as

178 other loci (See Supplementary Table 4.). The standard  $\beta$  estimates are reported along with179 the adjusted (adj.)  $R^2$  from multiple linear regression. P-values which passed Bonferroni



180 correction are highlighted in bold with a star. Global and local *Cohen's*  $f^2$  estimates for LOF  
181 were 0.03 and  $8.25 \times 10^{-5}$ , respectively. *IV = independent variable. N RV carriers = no. of*  
182 *participants that carried >1 rare variant.*

183

184

185

| Supplementary Table 16.   Relationship between FI scores and ND-CNVs adjusted for additional variants |                              |                                       |         |                            |                          |                         |                                           |                                          |
|-------------------------------------------------------------------------------------------------------|------------------------------|---------------------------------------|---------|----------------------------|--------------------------|-------------------------|-------------------------------------------|------------------------------------------|
| Independent variable                                                                                  | <i>n</i><br>(+ non-carriers) | <i>PGS + RVs</i><br><i>covariates</i> | $\beta$ | <i>Adj. R</i> <sup>2</sup> | <i>p</i>                 | F-test ( <i>p</i> )     | <i>Cohen's f</i> <sup>2</sup><br>(Global) | <i>Cohen's f</i> <sup>2</sup><br>(Local) |
| All ND-CNVs                                                                                           | 148,133                      | +                                     | -0.37   | 0.07                       | <2.00x10 <sup>-16*</sup> | <2.2 x10 <sup>-16</sup> | 0.06                                      | 1.15x10 <sup>-3</sup>                    |
|                                                                                                       |                              | -                                     | -0.39   | 0.04                       | <2.00x10 <sup>-16*</sup> |                         |                                           |                                          |
| All Deletions                                                                                         | 147,598                      | +                                     | -0.35   | 0.08                       | <2.00x10 <sup>-16*</sup> | <2.2 x10 <sup>-16</sup> | 0.08                                      | 6.50x10 <sup>-4</sup>                    |
|                                                                                                       |                              | -                                     | -0.38   | 0.03                       | <2.00x10 <sup>-16*</sup> |                         |                                           |                                          |
| All Duplications                                                                                      | 147,401                      | +                                     | -0.40   | 0.08                       | <2.00x10 <sup>-16*</sup> | <2.2 x10 <sup>-16</sup> | 0.08                                      | 6.28x10 <sup>-4</sup>                    |
|                                                                                                       |                              | -                                     | -0.41   | 0.03                       | <2.00x10 <sup>-16*</sup> |                         |                                           |                                          |
| 15q11.2 del.                                                                                          | 147,382                      | +                                     | -0.30   | 0.08                       | 1.63x10 <sup>-12*</sup>  | <2.2 x10 <sup>-16</sup> | 0.08                                      | 3.35x10 <sup>-4</sup>                    |
|                                                                                                       |                              | -                                     | -0.33   | 0.03                       | 2.15x10 <sup>-14*</sup>  |                         |                                           |                                          |
| 16p13.11 dup.                                                                                         | 147,126                      | +                                     | -0.25   | 0.08                       | 1.49x10 <sup>-5*</sup>   | <2.2 x10 <sup>-16</sup> | 0.08                                      | 1.19x10 <sup>-4</sup>                    |
|                                                                                                       |                              | -                                     | -0.28   | 0.03                       | 2.86x10 <sup>-6*</sup>   |                         |                                           |                                          |
| All ND-CNVs (excluding 15q11.2 del. & 16p13.11 dup.)                                                  | 147,347                      | +                                     | -0.51   | 0.08                       | <2.00x10 <sup>-16*</sup> | <2.2 x10 <sup>-16</sup> | 0.08                                      | 9.31x10 <sup>-4</sup>                    |
|                                                                                                       |                              | -                                     | -0.51   | 0.04                       | <2.00x10 <sup>-16*</sup> |                         |                                           |                                          |
| All Deletions (excluding 15q11.2 del.)                                                                | 147,075                      | +                                     | -0.48   | 0.08                       | 2.97x10 <sup>-13*</sup>  | <2.2 x10 <sup>-16</sup> | 0.08                                      | 3.46x10 <sup>-4</sup>                    |
|                                                                                                       |                              | -                                     | -0.49   | 0.03                       | 2.48x10 <sup>-13*</sup>  |                         |                                           |                                          |
| All Duplications (excluding 16p13.11 dup.)                                                            | 147,134                      | +                                     | -0.54   | 0.08                       | <2.00x10 <sup>-16*</sup> | <2.2 x10 <sup>-16</sup> | 0.08                                      | 5.84x10 <sup>-4</sup>                    |
|                                                                                                       |                              | -                                     | -0.54   | 0.03                       | <2.00x10 <sup>-16*</sup> |                         |                                           |                                          |

186

187 **Supplementary Table 16. Relationship between FI scores and ND-CNVs adjusted for additional variants.** All analyses were adjusted for  
188 covariates (Methods). *n* represents the ND-CNV of interest plus non-carriers. Three participants carried both 15q11.2 del. and 16p13.11 dup.  
189 and were included in both analyses. All ND-CNV carriers includes carriers of 15q11.2 del. and 16p13.11 dup as well as other loci. A “+/- “symbol  
190 in *PGS+ RV covariates* indicates whether the model was adjusted for additional common and rare genetic variants. The standard  $\beta$  estimates are  
191 reported along with the adjusted (adj.) from multiple linear regression. Bonferroni correction *p*-value < 0.008. *n ND-CNV carriers = 1,274; n*  
192 *deletion carriers = 789; n duplication carriers = 542; n 15q11.2 del. carriers = 523; n 16p13.11 carriers = 267; n ND-CNV carriers (excluding 15q11.2*

193 *del. carriers*) = 488; *n deletion carriers (excluding 15q11.2 carriers)* = 216; *n deletion carriers (excluding 16p13.11 dup. carriers)* = 275; *n non-*  
194 *carriers* = 146,859. See table S6 for numbers of ND-CNV carriers without non-carriers.

| Supplementary Table 17   PPVs for lower fluid intelligence (FI) scores based on PS_Cog |                  |       |                |                                 |
|----------------------------------------------------------------------------------------|------------------|-------|----------------|---------------------------------|
| Percentile of PS_Cog                                                                   | Group            | PPV   | 95% C.I        | p                               |
| <10                                                                                    | All ND-CNVs      | 0.127 | [0.077, 0.193] | <b>0.01</b>                     |
|                                                                                        | All Duplications | 0.194 | [0.104, 0.314] | <b>3.38x10<sup>-3</sup></b>     |
|                                                                                        | All Deletions    | 0.075 | [0.028, 0.156] | 0.48                            |
|                                                                                        | 15q11.2_del.     | 0.083 | [0.028, 0.184] | 0.09                            |
|                                                                                        | 16p13.11_dup.    | 0.143 | [0.040, 0.327] | <b>0.02</b>                     |
|                                                                                        | Non-carrier      | 0.044 | [0.041, 0.047] | <b>&lt;2.2x10<sup>-16</sup></b> |
| <25                                                                                    | All ND-CNVs      | 0.090 | [0.063, 0.123] | 0.13                            |
|                                                                                        | All Duplications | 0.108 | [0.064, 0.167] | 0.19                            |
|                                                                                        | All Deletions    | 0.078 | [0.046, 0.121] | 0.32                            |
|                                                                                        | 15q11.2_del.     | 0.067 | [0.034, 0.116] | 0.11                            |
|                                                                                        | 16p13.11_dup.    | 0.062 | [0.020, 0.138] | 0.26                            |
|                                                                                        | Non-carrier      | 0.039 | [0.037, 0.041] | <b>&lt;2.2x10<sup>-16</sup></b> |
| <50                                                                                    | All ND-CNVs      | 0.094 | [0.073, 0.118] | <b>0.02</b>                     |
|                                                                                        | All Duplications | 0.101 | [0.068, 0.141] | 0.19                            |
|                                                                                        | All Deletions    | 0.071 | [0.048, 0.100] | 0.35                            |
|                                                                                        | 15q11.2_del.     | 0.058 | [0.048, 0.101] | 0.11                            |
|                                                                                        | 16p13.11_dup.    | 0.048 | [0.019, 0.096] | 0.53                            |
|                                                                                        | Non-carrier      | 0.034 | [0.033, 0.036] | <b>2.15x10<sup>-12</sup></b>    |
| >50                                                                                    | All ND-CNVs      | 0.061 | [0.046, 0.078] | 0.28                            |
|                                                                                        | All Duplications | 0.072 | [0.049, 0.102] | 0.65                            |
|                                                                                        | All Deletions    | 0.052 | [0.035, 0.074] | 0.47                            |
|                                                                                        | 15q11.2_del.     | 0.034 | [0.018, 0.058] | 0.69                            |
|                                                                                        | 16p13.11_dup.    | 0.031 | [0.011, 0.066] | 0.71                            |
|                                                                                        | Non-carrier      | 0.025 | [0.024, 0.026] | <b>&lt;2.2x10<sup>-16</sup></b> |
| >75                                                                                    | All ND-CNVs      | 0.053 | [0.037, 0.074] | 0.10                            |
|                                                                                        | All Duplications | 0.062 | [0.037, 0.098] | 0.32                            |
|                                                                                        | All Deletions    | 0.045 | [0.026, 0.073] | 0.31                            |
|                                                                                        | 15q11.2_del.     | 0.026 | [0.009, 0.055] | 0.32                            |
|                                                                                        | 16p13.11_dup.    | 0.031 | [0.009, 0.077] | 0.82                            |
|                                                                                        | Non-carrier      | 0.023 | [0.022, 0.024] | <b>&lt;2.2x10<sup>-16</sup></b> |
| >90                                                                                    | All ND-CNVs      | 0.018 | [0.002, 0.063] | <b>0.02</b>                     |
|                                                                                        | All Duplications | 0.025 | [0.001, 0.132] | 0.37                            |
|                                                                                        | All Deletions    | 0.014 | [0, 0.074]     | 0.13                            |
|                                                                                        | 15q11.2_del.     | 0.018 | [0, 0.097]     | 0.73                            |
|                                                                                        | 16p13.11_dup.    | 0.000 | [0, 0.206]     | 1.00                            |
|                                                                                        | Non-carrier      | 0.016 | [0.014, 0.018] | <b>&lt;2.2x10<sup>-16</sup></b> |

195

196 **Supplementary Table 17. Positive predictive values for lower FI scores based on PS\_Cog.**

197 Here is shown the positive predictive values (PPVs) for participants grouped by cognition  
198 polygenic score (PS\_Cog) percentile stratified by ND-CNV carrier group. PPVs for are given for  
199 lower FI scores (< 2 s.d. from cohort mean) against non-carriers. 7% of ND-CNV carriers, 4%  
200 of deletion carriers, 6% of duplication carriers, 4% of 15q11.2 del. carriers, 4% of 16p13.11  
201 dup. carriers, and 3% of non-carriers had FI scores two standard deviations below the cohort

202 mean and was taken as the pre-test probability. The confidence intervals are also presented.

203 *PS\_Cog* = cognition polygenic score.

204

| Supplementary Table 18   PPVs for lower fluid intelligence (FI) scores based on PS_Cog |                  |       |                |                                 |
|----------------------------------------------------------------------------------------|------------------|-------|----------------|---------------------------------|
| Percentile of PS_EA                                                                    | Group            | PPV   | 95% C.I        | p                               |
| <10                                                                                    | ND-CNV           | 0.107 | [0.064, 0.166] | 0.08                            |
|                                                                                        | All Duplications | 0.090 | [0.034, 0.185] | 0.66                            |
|                                                                                        | All Deletions    | 0.120 | [0.061, 0.204] | <b>0.03</b>                     |
|                                                                                        | 15q11.2_del.     | 0.118 | [0.052, 0.219] | <b>5.71x10<sup>-3</sup></b>     |
|                                                                                        | 16p13.11_dup.    | 0.030 | [0, 0.158]     | 1.00                            |
|                                                                                        | Non-carrier      | 0.057 | [0.053, 0.061] | <b>&lt;2.2x10<sup>-16</sup></b> |
| <25                                                                                    | ND-CNV           | 0.093 | [0.066, 0.127] | 0.09                            |
|                                                                                        | All Duplications | 0.097 | [0.056, 0.156] | 0.46                            |
|                                                                                        | All Deletions    | 0.090 | [0.056, 0.135] | 0.07                            |
|                                                                                        | 15q11.2_del.     | 0.086 | [0.048, 0.140] | <b>7.43x10<sup>-3</sup></b>     |
|                                                                                        | 16p13.11_dup.    | 0.013 | [0, 0.068]     | 0.38                            |
|                                                                                        | Non-carrier      | 0.048 | [0.046, 0.05]  | <b>&lt;2.2x10<sup>-16</sup></b> |
| 25-50                                                                                  | ND-CNV           | 0.089 | [0.069, 0.113] | 0.05                            |
|                                                                                        | All Duplications | 0.106 | [0.073, 0.148] | 0.10                            |
|                                                                                        | All Deletions    | 0.076 | [0.053, 0.106] | 0.18                            |
|                                                                                        | 15q11.2_del.     | 0.056 | [0.048, 0.101] | 0.11                            |
|                                                                                        | 16p13.11_dup.    | 0.048 | [0.019, 0.096] | 0.53                            |
|                                                                                        | Non-carrier      | 0.038 | [0.037, 0.04]  | <b>&lt;2.2x10<sup>-16</sup></b> |
| >50                                                                                    | ND-CNV           | 0.059 | [0.045, 0.077] | 0.22                            |
|                                                                                        | All Duplications | 0.076 | [0.052, 0.106] | 0.86                            |
|                                                                                        | All Deletions    | 0.046 | [0.030, 0.067] | 0.20                            |
|                                                                                        | 15q11.2_del.     | 0.029 | [0.012, 0.058] | 0.51                            |
|                                                                                        | 16p13.11_dup.    | 0.051 | [0.024, 0.092] | 0.36                            |
|                                                                                        | Non-carrier      | 0.022 | [0.021, 0.023] | <b>&lt;2.2x10<sup>-16</sup></b> |
| >75                                                                                    | ND-CNV           | 0.046 | [0.031, 0.065] | <b>0.02</b>                     |
|                                                                                        | All Duplications | 0.057 | [0.033, 0.094] | 0.21                            |
|                                                                                        | All Deletions    | 0.038 | [0.020, 0.064] | 0.09                            |
|                                                                                        | 15q11.2_del.     | 0.026 | [0.013, 0.047] | 0.19                            |
|                                                                                        | 16p13.11_dup.    | 0.031 | [0.009, 0.077] | 0.82                            |
|                                                                                        | Non-carrier      | 0.019 | [0.018, 0.02]  | <b>&lt;2.2x10<sup>-16</sup></b> |
| >90                                                                                    | ND-CNV           | 0.019 | [0.002, 0.066] | <b>0.03</b>                     |
|                                                                                        | All Duplications | 0.020 | [0, 0.109]     | 0.37                            |
|                                                                                        | All Deletions    | 0.020 | [0, 0.092]     | 0.26                            |
|                                                                                        | 15q11.2_del.     | 0.022 | [0, 0.118]     | 1.00                            |
|                                                                                        | 16p13.11_dup.    | 0.000 | [0, 0.142]     | 1.00                            |
|                                                                                        | Non-carrier      | 0.012 | [0.010, 0.013] | <b>&lt;2.2x10<sup>-16</sup></b> |

205

206 **Supplementary Table 18. Positive predictive values for lower FI scores based on PS\_EA.** Here

207 is shown the positive predictive values (PPVs) for participants grouped by cognition education

208 attainment polygenic score (PS\_EA) percentile stratified by ND-CNV carrier group. PPVs for

209 are given for lower *FI* scores ( $< 2$  s.d. from cohort mean) against non-carriers. 7% of ND-CNV  
210 carriers, 4% of deletion carriers, 6% of duplication carriers, 4% of 15q11.2 del. carriers, 4% of  
211 16p13.11 dup. carriers, and 3% of non-carriers had *FI* scores two standard deviations below  
212 the cohort mean and was taken as the pre-test probability. The confidence intervals are also  
213 presented.

| Supplementary Table 19   Polygenic score differences between and within ND-CNV carriers and non-carriers |                                                      |                                |                               |                             |             |              |                               |                               |                              |                              |                       |        |   |
|----------------------------------------------------------------------------------------------------------|------------------------------------------------------|--------------------------------|-------------------------------|-----------------------------|-------------|--------------|-------------------------------|-------------------------------|------------------------------|------------------------------|-----------------------|--------|---|
| PGS                                                                                                      | ND-CNV group                                         | ND-CNV Carrier vs Non-Carriers |                               |                             |             |              | Sex differences within Groups |                               |                              |                              |                       |        |   |
|                                                                                                          |                                                      | n                              | mean [s.d]                    | p                           | Cor. p      | d            | Male (n)                      | Female (n)                    | Male mean [s.d]              | Female mean [s.d]            | p                     | Cor. p | d |
| PS_Cog                                                                                                   | All ND-CNV                                           | 1,318                          | -0.08 [0.99]                  | <b>2.54x10<sup>-3</sup></b> | 0.11        | -            | 666                           | 652                           | -0.08 [0.96]                 | -0.08 [1.03]                 | 0.94                  | -      | - |
|                                                                                                          | All duplications                                     | 561                            | -0.08 [0.96]                  | 0.05                        | -           | -            | 290                           | 271                           | -0.07 [0.89]                 | -0.09 [1.02]                 | 0.81                  | -      | - |
|                                                                                                          | All deletions                                        | 764                            | -0.08 [1.03]                  | 0.02                        | 0.99        | -            | 380                           | 384                           | -0.09 [1.01]                 | -0.07 [1.04]                 | 0.74                  | -      | - |
|                                                                                                          | All ND-CNVs (excluding 15q11.2 del. & 16p11.13 dup.) | 504                            | -0.027 [0.99]                 | 0.53                        | -           | -            | 261                           | 243                           | -0.06 [0.91]                 | 3.01x10 <sup>-4</sup> [1.07] | 0.68                  | -      | - |
|                                                                                                          | Duplications (excluding 16p11.13 dup.)               | 286                            | -0.04 [1.00]                  | 0.48                        | -           | -            | 154                           | 132                           | -0.09 [0.90]                 | 0.01 [1.10]                  | 0.39                  | -      | - |
|                                                                                                          | Deletions (excluding 15q11.2 del.)                   | 221                            | -0.01 [0.98]                  | 0.79                        | -           | -            | 108                           | 113                           | -0.01 [0.93]                 | -0.01 [1.03]                 | 0.96                  | -      | - |
|                                                                                                          | 15q11.2 del.                                         | 543                            | -0.11 [1.05]                  | 0.02                        | 0.49        | -            | 272                           | 271                           | -0.13 [1.05]                 | -0.09 [1.05]                 | 0.69                  | -      | - |
|                                                                                                          | 16p13.11 dup.                                        | 275                            | -0.13 [0.91]                  | 0.02                        | 0.86        | -            | 136                           | 139                           | -0.06 [0.88]                 | -0.20 [0.93]                 | 0.21                  | -      | - |
|                                                                                                          | 22q11.2 dup.                                         | 83                             | -0.10 [1.04]                  | 0.35                        | -           | -            | 44                            | 39                            | -0.06 [0.93]                 | -0.15 [1.17]                 | 0.70                  | -      | - |
|                                                                                                          | 1q21.1 dup.                                          | 73                             | -0.03 [1.07]                  | 0.78                        | -           | -            | 39                            | 34                            | -0.04 [0.86]                 | -0.02 [1.28]                 | 0.95                  | -      | - |
|                                                                                                          | 16p12.1 del.                                         | 64                             | -1.39x10 <sup>-3</sup> [0.96] | 0.99                        | -           | -            | -                             | -                             | -                            | -                            | -                     | -      | - |
|                                                                                                          | NRXN1 del.                                           | 56                             | -0.05 [1.04]                  | 0.69                        | -           | -            | -                             | -                             | -                            | -                            | -                     | -      | - |
|                                                                                                          | 16p11.2 dup.                                         | 46                             | -0.34 [1.01]                  | 0.81                        | -           | -            | -                             | -                             | -                            | -                            | -                     | -      | - |
|                                                                                                          | 16p11.2 distal dup.                                  | 38                             | -0.03 [0.94]                  | 0.87                        | -           | -            | -                             | -                             | -                            | -                            | -                     | -      | - |
|                                                                                                          | 1q21.1 del.                                          | 35                             | -0.07 [1.16]                  | 0.66                        | -           | -            | -                             | -                             | -                            | -                            | -                     | -      | - |
| Non-carrier                                                                                              | 152,325                                              | 7.16x10 <sup>-4</sup> [1.00]   | -                             | -                           | -           | 71,534       | 80,791                        | -9.71x10 <sup>-4</sup> [1.00] | 2.21x10 <sup>-3</sup> [1.00] | 0.54                         | -                     | -      |   |
| PS_EA                                                                                                    | All ND-CNV                                           | <b>1,318</b>                   | <b>-0.09 [1.02]</b>           | <b>4.41x10<sup>-4</sup></b> | <b>0.02</b> | <b>0.097</b> | 666                           | 652                           | -0.11 [0.98]                 | -0.08 [1.05]                 | 0.60                  | -      | - |
|                                                                                                          | All duplications                                     | 561                            | -0.07 [1.02]                  | 0.10                        | -           | -            | 290                           | 271                           | -0.01 [1.00]                 | 0.01 [1.00]                  | 0.35                  | -      | - |
|                                                                                                          | All deletions                                        | 764                            | -0.11 [1.01]                  | 1.15x10 <sup>-3</sup>       | 0.05        | -            | 380                           | 384                           | -0.11 [0.98]                 | -0.12 [1.04]                 | 0.93                  | -      | - |
|                                                                                                          | All ND-CNVs (excluding 15q11.2 del. & 16p11.13 dup.) | 504                            | -0.06 [1.00]                  | 0.17                        | -           | -            | 261                           | 243                           | -0.13 [0.96]                 | 0.01 [1.04]                  | 0.12                  | -      | - |
|                                                                                                          | Duplications (excluding 16p11.13 dup.)               | 286                            | -0.03 [1.00]                  | 0.57                        | -           | -            | 154                           | 132                           | -0.15 [0.96]                 | -0.10 [1.03]                 | 0.04                  | 1.00   | - |
|                                                                                                          | Deletions (excluding 15q11.2 del.)                   | 221                            | -1.00 [0.99]                  | 0.15                        | -           | -            | 108                           | 113                           | -0.09 [0.96]                 | -0.10 [1.03]                 | 0.99                  | -      | - |
|                                                                                                          | 15q11.2 del.                                         | 543                            | -0.13 [1.02]                  | 3.23x10 <sup>-3</sup>       | 0.15        | -            | 272                           | 271                           | -0.12 [0.99]                 | -0.13 [1.05]                 | 0.93                  | -      | - |
|                                                                                                          | 16p13.11 dup.                                        | 275                            | -0.11 [1.03]                  | 0.08                        | -           | -            | 136                           | 139                           | -0.06 [0.98]                 | -0.15 [1.08]                 | 0.49                  | -      | - |
|                                                                                                          | 22q11.2 dup.                                         | 83                             | -0.10 [1.01]                  | 0.34                        | -           | -            | 44                            | 39                            | -0.22 [1.00]                 | 0.03 [1.01]                  | 0.26                  | -      | - |
|                                                                                                          | 1q21.1 dup.                                          | 73                             | -0.04 [0.91]                  | 0.75                        | -           | -            | 39                            | 34                            | -0.11 [0.76]                 | 0.05 [1.06]                  | 0.47                  | -      | - |
|                                                                                                          | 16p12.1 del.                                         | 64                             | -0.35 [0.89]                  | 4.85x10 <sup>-3</sup>       | 0.22        | -            | -                             | -                             | -                            | -                            | -                     | -      | - |
|                                                                                                          | NRXN1 del.                                           | 56                             | 0.01 [1.12]                   | 0.93                        | -           | -            | -                             | -                             | -                            | -                            | -                     | -      | - |
|                                                                                                          | 16p11.2 dup.                                         | 46                             | 0.17 [1.04]                   | 0.24                        | -           | -            | -                             | -                             | -                            | -                            | -                     | -      | - |
|                                                                                                          | 16p11.2 distal dup.                                  | 38                             | -0.22 [1.14]                  | 0.17                        | -           | -            | -                             | -                             | -                            | -                            | -                     | -      | - |
|                                                                                                          | 1q21.1 del.                                          | 35                             | 0.19 [0.88]                   | 0.25                        | -           | -            | -                             | -                             | -                            | -                            | -                     | -      | - |
| Non-carrier                                                                                              | 152,325                                              | 8.33x10 <sup>-4</sup> [1.00]   | -                             | -                           | -           | 71,534       | 80,791                        | -0.01 [1.00]                  | 0.01 [1.00]                  | 4.21x10 <sup>-6</sup>        | 1.39x10 <sup>-4</sup> | 0.024  |   |
| PS_ASD                                                                                                   | All ND-CNV                                           | 1,318                          | 0.04 [1.02]                   | 0.11                        | -           | -            | 666                           | 652                           | 0.04 [1.06]                  | 0.04 [0.97]                  | 0.98                  | -      | - |
|                                                                                                          | All dup. carriers                                    | 561                            | 0.06 [1.01]                   | 0.17                        | -           | -            | 290                           | 271                           | 0.06 [1.10]                  | 0.06 [0.89]                  | 0.99                  | -      | - |
|                                                                                                          | All del. carriers                                    | 764                            | 0.04 [1.03]                   | 0.30                        | -           | -            | 380                           | 384                           | 0.03 [1.04]                  | 0.04 [1.02]                  | 0.91                  | -      | - |
|                                                                                                          | All ND-CNVs (excluding 15q11.2 del. & 16p11.13 dup.) | 504                            | 0.02 [1.02]                   | 0.71                        | -           | -            | 261                           | 243                           | -0.01 [1.09]                 | 0.05 [0.94]                  | 0.52                  | -      | - |
|                                                                                                          | Duplications (excluding 16p11.13 dup.)               | 286                            | 0.04 [1.01]                   | 0.45                        | -           | -            | 154                           | 132                           | 0.04 [1.10]                  | 0.03 [0.90]                  | 0.96                  | -      | - |
|                                                                                                          | Deletions (excluding 15q11.2 del.)                   | 221                            | -0.02 [1.03]                  | 0.80                        | -           | -            | 108                           | 113                           | -0.10 [1.06]                 | 0.06 [1.00]                  | 0.23                  | -      | - |
|                                                                                                          | 15q11.2 del.                                         | 543                            | 0.06 [1.03]                   | 0.16                        | -           | -            | 272                           | 271                           | 0.09 [1.02]                  | 0.03 [1.03]                  | 0.54                  | -      | - |
|                                                                                                          | 16p13.11 dup.                                        | 275                            | 0.07 [1.00]                   | 0.23                        | -           | -            | 136                           | 139                           | 0.07 [1.10]                  | 0.07 [0.89]                  | 0.99                  | -      | - |
|                                                                                                          | 22q11.2 dup.                                         | 83                             | 0.06 [1.23]                   | 0.61                        | -           | -            | 44                            | 39                            | 0.14 [1.36]                  | -0.04 [1.08]                 | 0.51                  | -      | - |
|                                                                                                          | 1q21.1 dup.                                          | 73                             | 0.05 [0.88]                   | 0.68                        | -           | -            | 39                            | 34                            | 0.03 [0.91]                  | 0.07 [0.84]                  | 0.88                  | -      | - |
|                                                                                                          | 16p12.1 del.                                         | 64                             | 0.08 [1.07]                   | 0.50                        | -           | -            | -                             | -                             | -                            | -                            | -                     | -      | - |
|                                                                                                          | NRXN1 del.                                           | 56                             | 0.12 [1.20]                   | 0.38                        | -           | -            | -                             | -                             | -                            | -                            | -                     | -      | - |
|                                                                                                          | 16p11.2 dup.                                         | 46                             | 0.20 [0.80]                   | 0.18                        | -           | -            | -                             | -                             | -                            | -                            | -                     | -      | - |
|                                                                                                          | 16p11.2 distal dup.                                  | 38                             | -0.05 [1.02]                  | 0.77                        | -           | -            | -                             | -                             | -                            | -                            | -                     | -      | - |
|                                                                                                          | 1q21.1 del.                                          | 35                             | -0.02 [1.02]                  | 0.92                        | -           | -            | -                             | -                             | -                            | -                            | -                     | -      | - |
| Non-carrier                                                                                              | 152,325                                              | -3.76x10 <sup>-4</sup> [1.00]  | -                             | -                           | -           | 71,534       | 80,791                        | -0.01 [1.00]                  | 0.01 [1.00]                  | 0.02                         | 0.60                  | -      |   |

214

215 **Supplementary Table 19. Additional common variant load differences between and within**216 **ND-CNV carriers and non-carriers.** The table shows results for both differences in PGS

217 between ND-CNV carriers and non-carriers, and sex differences in PGS with groups of ND-CNV

218 carriers. Highlighted in bold are significant *p*-values that passed Bonferroni correction (*p*

219  $<1.11 \times 10^{-3}$ , 45 tests). Cohen's  $d$  was calculated for significant  $p$ -values after Bonferroni  
220 correction. Cohen's  $d$  :  $> 0.15 = \text{small effect}$  ;  $>0.4 = \text{medium effect}$  ;  $> 0.75 = \text{large effect}$ .  
221  $PS\_Cog = \text{Cognition polygenic score}$ ;  $PS\_EA = \text{educational attainment polygenic score}$ ;  $PS\_ASD$   
222  $= \text{autism polygenic score}$ ;  $Cor. p = \text{corrected } p\text{-value}$ ;  $d = \text{Cohen's } d$ .



| Supplementary Table 20   Additional rare variant load differences between and within ND-CNV carriers and non-carriers |                                                      |                    |                |                       |             |                               |            |             |               |                        |                        |      |
|-----------------------------------------------------------------------------------------------------------------------|------------------------------------------------------|--------------------|----------------|-----------------------|-------------|-------------------------------|------------|-------------|---------------|------------------------|------------------------|------|
| RV                                                                                                                    | ND-CNV Group                                         | Carrier vs Control |                |                       |             | Sex differences within Groups |            |             |               |                        |                        |      |
|                                                                                                                       |                                                      | n                  | median [range] | p                     | Corrected p | Male (n)                      | Female (n) | Male median | Female median | p                      | Corrected p            | r    |
| DDD                                                                                                                   | All ND-CNVs                                          | 1,275              | 0 [0, 3]       | 0.34                  | -           | 637                           | 638        | 0 [0, 3]    | 0 [0, 3]      | 0.07                   | -                      | -    |
|                                                                                                                       | All duplications                                     | 542                | 0 [0, 3]       | 0.47                  | -           | 277                           | 265        | 0 [0, 3]    | 0 [0, 3]      | 0.19                   | -                      | -    |
|                                                                                                                       | All deletions                                        | 740                | 0 [0, 3]       | 0.08                  | -           | 364                           | 376        | 0 [0, 3]    | 0 [0, 3]      | 0.23                   | -                      | -    |
|                                                                                                                       | All ND-CNVs (excluding 15q11.2 del. & 16p11.13 dup.) | 489                | 0 [0, 3]       | 0.35                  | -           | 251                           | 238        | 0 [0, 3]    | 0 [0, 2]      | 0.09                   | -                      | -    |
|                                                                                                                       | Duplications (excluding 16p11.13 dup.)               | 275                | 0 [0, 3]       | 0.08                  | -           | 147                           | 128        | 0 [0, 3]    | 0 [0, 3]      | 0.49                   | -                      | -    |
|                                                                                                                       | Deletions (excluding 15q11.2 del.)                   | 217                | 0 [0, 3]       | 0.74                  | -           | 105                           | 112        | 0 [0, 3]    | 0 [0, 1]      | 0.10                   | -                      | -    |
|                                                                                                                       | 15q11.2 del.                                         | 523                | 0 [0, 3]       | 0.06                  | -           | 259                           | 264        | 0 [0, 3]    | 0 [0, 3]      | 0.72                   | -                      | -    |
|                                                                                                                       | 16p13.11 dup.                                        | 267                | 0 [0, 3]       | 0.45                  | -           | 130                           | 137        | 0 [0, 3]    | 0 [0, 2]      | 0.29                   | -                      | -    |
|                                                                                                                       | 22q11.2 dup.                                         | 81                 | 0 [0, 3]       | 2.04x10 <sup>-3</sup> | 0.06        | -                             | -          | -           | -             | -                      | -                      | -    |
|                                                                                                                       | Non-carrier                                          | 146,894            | 0 [0,5]        | -                     | -           | 68,983                        | 77,911     | 0 [0, 5]    | 0 [0, 5]      | 0.06                   | -                      | -    |
| SFARI                                                                                                                 | All ND-CNVs                                          | 1,275              | 0 [0, 2]       | 0.19                  | -           | 637                           | 638        | 0 [0, 2]    | 0 [0, 2]      | 0.08                   | -                      | -    |
|                                                                                                                       | All duplications                                     | 542                | 0 [0, 2]       | 0.55                  | -           | 277                           | 265        | 0 [0, 2]    | 0 [0, 2]      | 0.27                   | -                      | -    |
|                                                                                                                       | All deletions                                        | 740                | 0 [0, 2]       | 0.30                  | -           | 364                           | 376        | 0 [0, 2]    | 0 [0, 2]      | 0.15                   | -                      | -    |
|                                                                                                                       | All ND-CNVs (excluding 15q11.2 del. & 16p11.13 dup.) | 489                | 0 [0, 2]       | 0.42                  | -           | 251                           | 238        | 0 [0, 1]    | 0 [0, 2]      | 0.94                   | -                      | -    |
|                                                                                                                       | Duplications (excluding 16p11.13 dup.)               | 275                | 0 [0, 2]       | 0.51                  | -           | 147                           | 128        | 0 [0, 1]    | 0 [0, 2]      | 0.98                   | -                      | -    |
|                                                                                                                       | Deletions (excluding 15q11.2 del.)                   | 217                | 0 [0, 2]       | 0.70                  | -           | 105                           | 112        | 0 [0, 1]    | 0 [0, 2]      | 1.00                   | -                      | -    |
|                                                                                                                       | 15q11.2 del.                                         | 523                | 0 [0, 2]       | 0.33                  | -           | 259                           | 264        | 0 [0, 2]    | 0 [0, 2]      | 0.08                   | -                      | -    |
|                                                                                                                       | 16p13.11 dup.                                        | 267                | 0 [0, 2]       | 0.84                  | -           | 130                           | 137        | 0 [0, 2]    | 0 [0, 1]      | 0.11                   | -                      | -    |
|                                                                                                                       | 22q11.2 dup.                                         | 81                 | 0 [0, 2]       | 0.82                  | -           | -                             | -          | -           | -             | -                      | -                      | -    |
|                                                                                                                       | Non-carrier                                          | 146,894            | 0 [0,4]        | -                     | -           | 68,983                        | 77,911     | 0 [0, 4]    | 0 [0, 4]      | 0.70                   | -                      | -    |
| LOF                                                                                                                   | All ND-CNVs                                          | 1,275              | 1 [0, 6]       | 0.96                  | -           | 637                           | 638        | 1 [0, 6]    | 1 [0, 6]      | 0.02                   | 0.50                   | -    |
|                                                                                                                       | All duplications                                     | 542                | 1 [0, 6]       | 0.67                  | -           | 277                           | 265        | 1 [0, 5]    | 1 [0, 6]      | 0.04                   | 1.00                   | -    |
|                                                                                                                       | All deletions                                        | 740                | 1 [0, 6]       | 0.65                  | -           | 364                           | 376        | 1 [0, 6]    | 1 [0, 6]      | 0.14                   | -                      | -    |
|                                                                                                                       | All ND-CNVs (excluding 15q11.2 del. & 16p11.13 dup.) | 489                | 1 [0, 6]       | 0.95                  | -           | 251                           | 238        | 1 [0, 6]    | 1 [0, 6]      | 0.05                   | -                      | -    |
|                                                                                                                       | Duplications (excluding 16p11.13 dup.)               | 275                | 1 [0, 6]       | 0.51                  | -           | 147                           | 128        | 1 [0, 5]    | 1 [0, 6]      | 0.02                   | 0.74                   | -    |
|                                                                                                                       | Deletions (excluding 15q11.2 del.)                   | 217                | 1 [0, 6]       | 0.49                  | -           | 105                           | 112        | 1 [0, 6]    | 1 [0, 6]      | 0.57                   | -                      | -    |
|                                                                                                                       | 15q11.2 del.                                         | 523                | 1 [0, 5]       | 0.92                  | -           | 259                           | 264        | 1 [0, 5]    | 1 [0, 5]      | 0.17                   | -                      | -    |
|                                                                                                                       | 16p13.11 dup.                                        | 267                | 1 [0, 5]       | 0.95                  | -           | 130                           | 137        | 1 [0, 5]    | 1 [0, 5]      | 0.46                   | -                      | -    |
|                                                                                                                       | 22q11.2 dup.                                         | 81                 | 1 [0, 4]       | 0.93                  | -           | -                             | -          | -           | -             | -                      | -                      | -    |
|                                                                                                                       | Non-carrier                                          | 146,894            | 0 [0,10]       | -                     | -           | 68,983                        | 77,911     | 0 [0, 10]   | 0 [0, 9]      | 1.05x10 <sup>-11</sup> | 3.16x10 <sup>-10</sup> | 0.02 |

224 **Supplementary Table 20. Additional rare variant load differences between and within ND-CNV carriers and non-carriers.** Listed are the  
225 uncorrected  $p$ -values from two-tailed Wilcoxon rank sum tests assessing the difference in rare variant counts between carriers of ND-CNVs and  
226 non-carriers, and between males and females within each group. Highlighted in bold are significant  $p$ -values that passed Bonferroni correction  
227 ( $p < 1.66 \times 10^{-3}$ , 30 tests).  $r$  effect sizes were calculated for significant  $p$ -values after Bonferroni correction.  $r$ :  $>0.1 = \textit{small effect}$ ;  $>0.3 = \textit{medium}$   
228  $\textit{effect}$ ;  $>0.5 = \textit{large effect}$ . *RV – rare variant gene-set*

229 **4. Supplementary Figures 1-15**

Supplementary Figure 1.

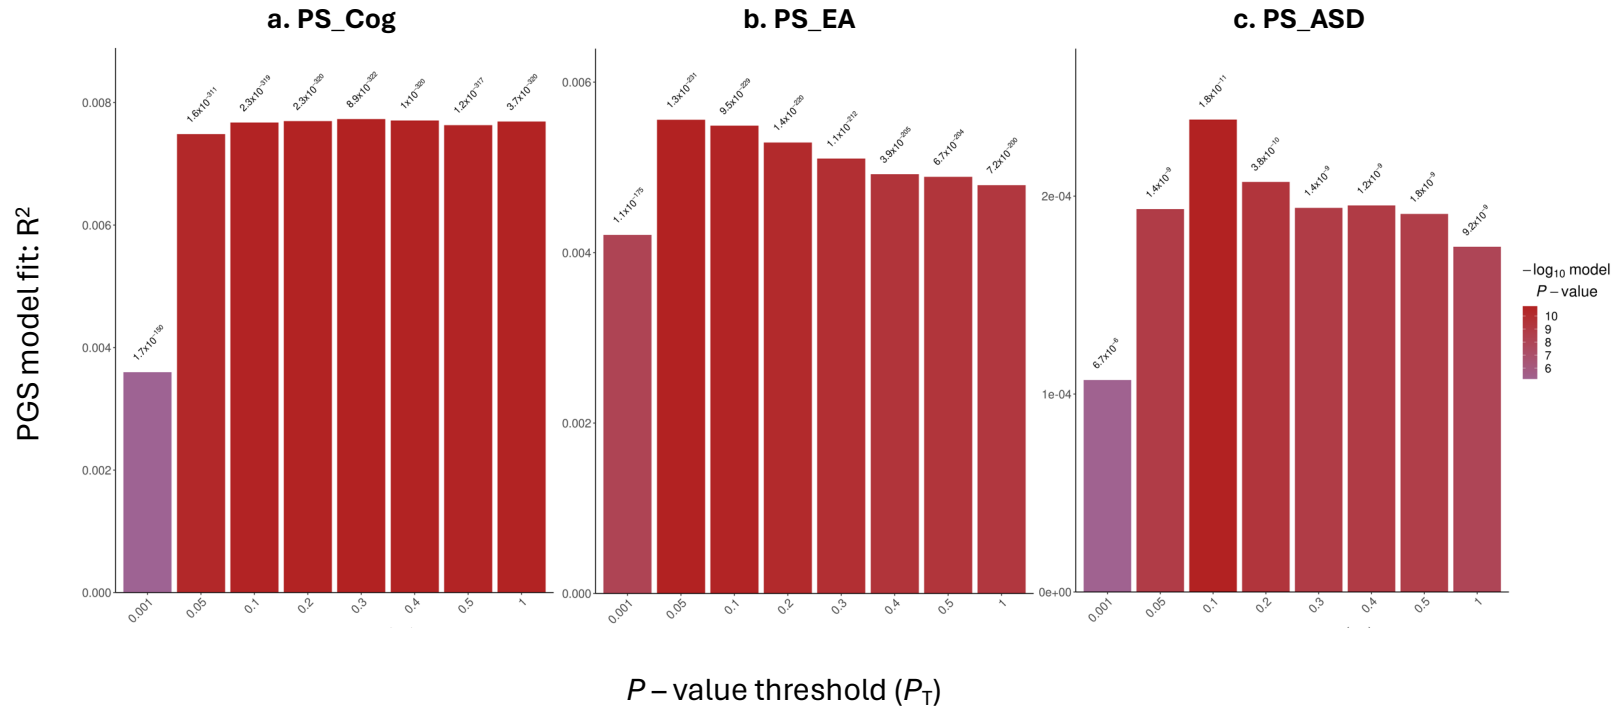

231 **Supplementary Figure 1. P-value threshold selection for polygenic scores.** Polygenic scores (PGS) were generated for cognition (PS\_Cog),  
 232 educational attainment (PS\_EA) and autism (PS\_ASD) (Methods). 153,607 samples were included in the analysis (1,317 ND-CNV carriers and  
 233 152,290 non-carriers).  $R^2$  values were calculated for  $P$ -value thresholds at 0.001, 0.05, 0.1, 0.2, 0.3, 0.4, 0.5 and 1. This figure was generated using

234 PRSice-2<sup>49</sup>. **a.** 232,122 variants were included in PS\_Cog after clumping. **b.** 281,280 variants were included in PS\_EA after clumping. **c.** 129,955  
235 variants were included in PS\_ASD after clumping. A p-value threshold of 0.1 was selected for further analyses.

236 Supplementary Figure 2.

237

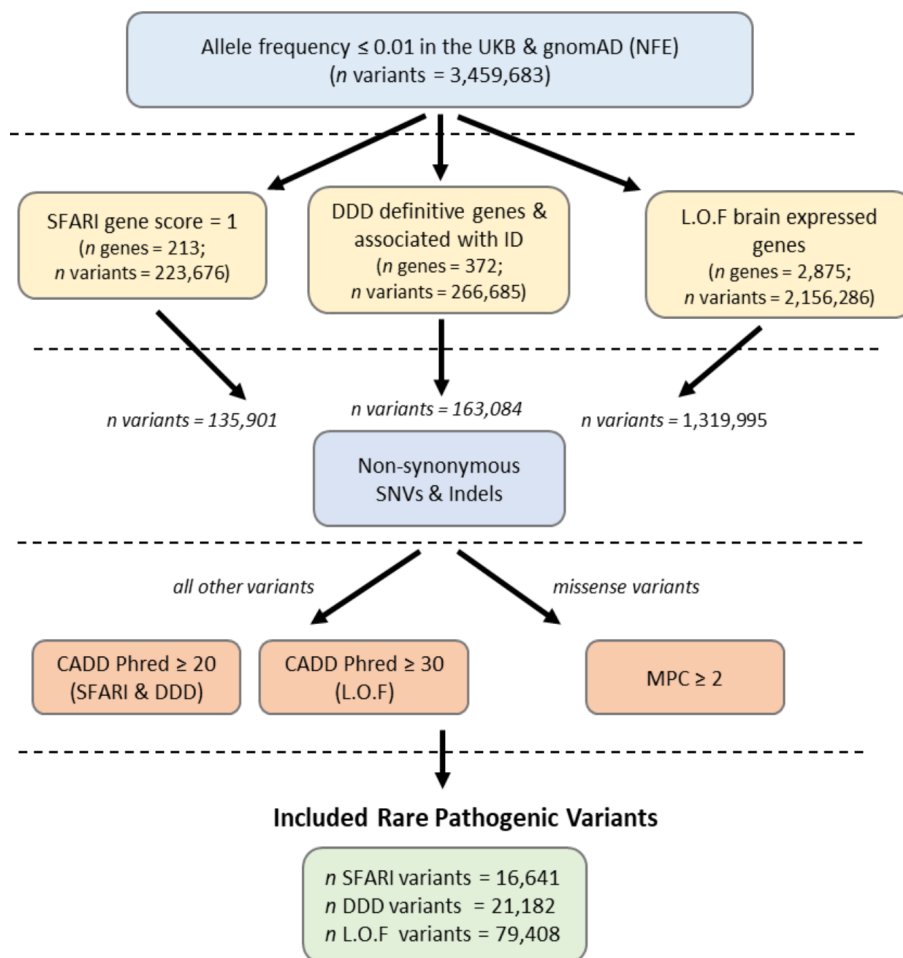

238 **Supplementary Figure 2. Flow diagram of rare variant filtration.** Variants were first passed  
 239 through an allele frequency filter of  $\leq 0.01$  in gnomAD (NFE). Variants were then filtered based  
 240 on gene set – SFARI (autism associated genes), DDD (ID associated genes, and L.O.F (brain  
 241 expressed genes). Total no. genes in SFARI gene set = 960. Total no. genes in DDD gene set =  
 242 2,580. Transcripts annotated as intronic, synonymous, upstream gene variant, downstream  
 243 gene variant or nonsense-mediated decay, were not included for analysis. *NFE = Non-Finnish*  
 244 *European.*

245

246 Supplementary Figure 3.

247

248

249

250

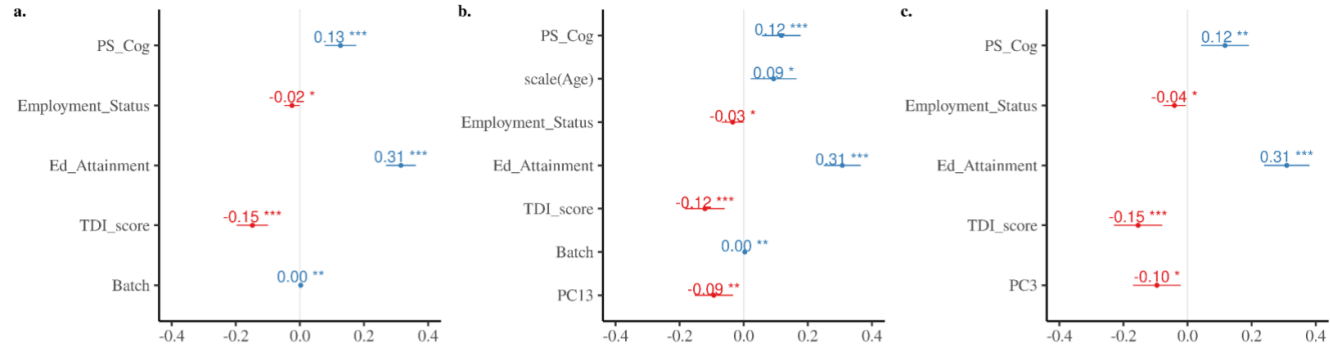

251

252

253

254

255

256

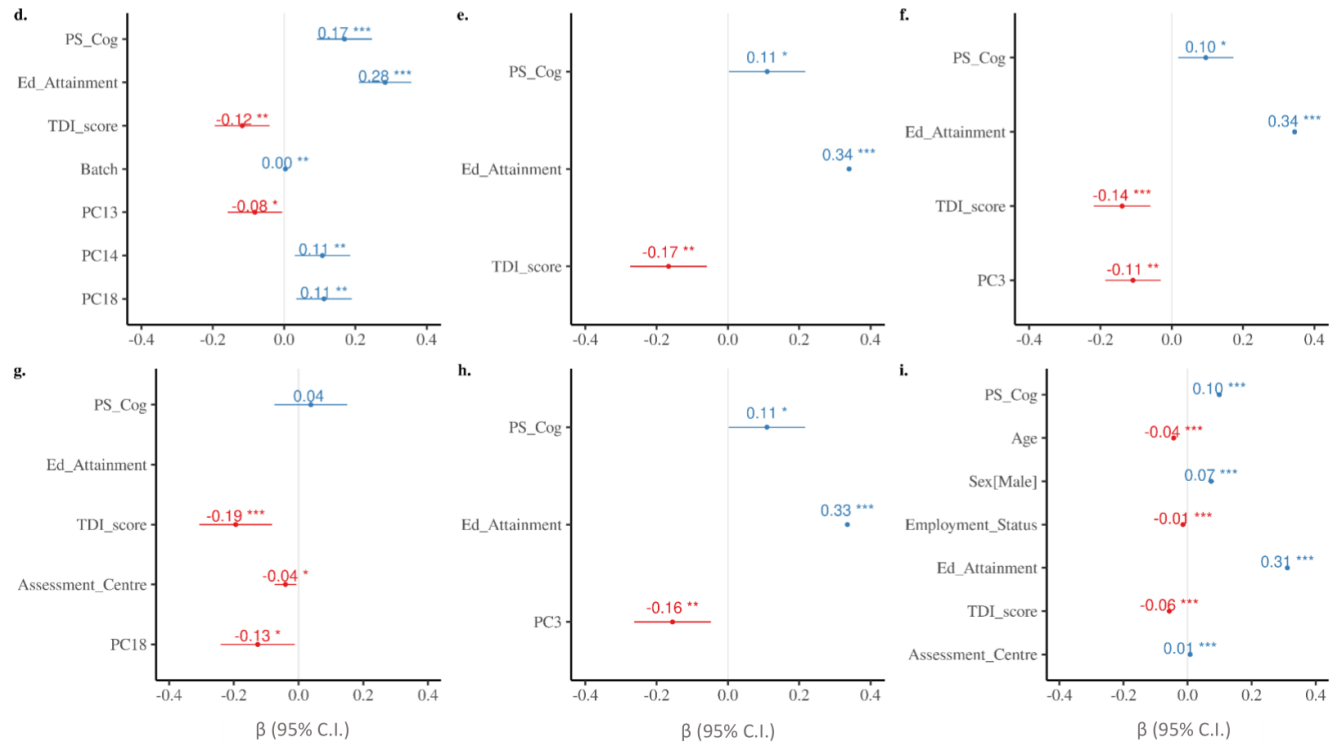

257 **Supplementary Figure 3. Forest plots of linear regression analyses of participant *FI* scores vs Cognition PGS.** The plots show the  $\beta$  coefficients  
258 from linear regression analyses (Table 2.) testing the association of participant *FI* with PGS for cognition (PS\_Cog) within all **a.** ND-CNV carriers  
259 (n = 1,317), **b.** deletion carriers (n = 763), **c.** duplication carriers (n = 561), **d.** 15q11.2 del. carriers (n = 543), **e.** 16p13.11 dup. carriers (n = 275),  
260 **f.** ND-CNV carriers (excluding 15q11.2 del. and 16p13.11 dup.) (n = 503), **g.** deletion carriers (excluding 15q11.2 del.) (n = 220), **h.** duplications  
261 carriers (excluding 16p13.11 dup.) (n = 286), and **i.** non-carriers (n = 152,290). Significant principal components (PCs) were not plotted for non-  
262 carriers visualisation purposes. *Red* =  $\beta < 0$ , *Blue* =  $\beta > 0$ . *Del.* = *deletion*; *Dup.* = *duplication*; *TDI* = *Townsend Deprivation Index*; \* =  $p < 0.05$ , \*\*  
263 =  $p < 0.01$ , \*\*\* =  $<0.001$ .

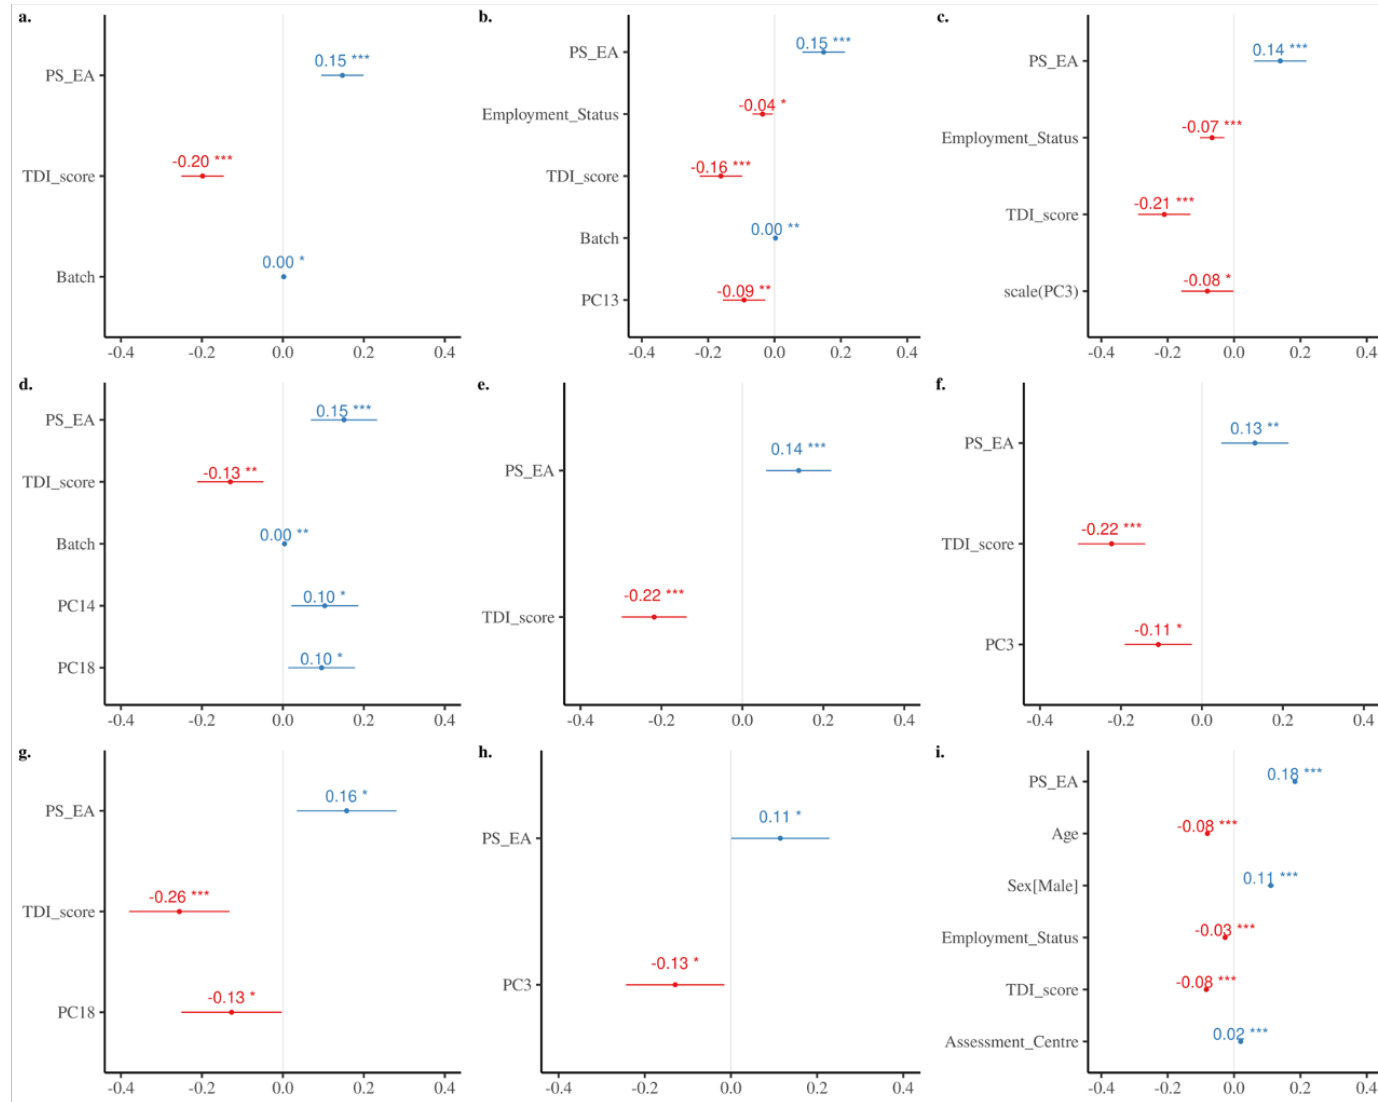



265 **Supplementary Figure 4. Forest plots of linear regression analyses of participant *FI* scores vs Educational Attainment PGS.** The plots show the  
266  $\beta$  coefficients from linear regression analyses (Table 2.) testing the association of participant *FI* with PGS for educational attainment (PS\_EA)  
267 within all **a.** ND-CNV carriers (n = 1,317), **b.** deletion carriers (n = 763), **c.** duplication carriers (n = 561), **d.** 15q11.2 del. carriers (n = 543), **e.**  
268 16p13.11 dup. carriers (n = 275), **f.** ND-CNV carriers (excluding 15q11.2 del. and 16p13.11 dup.) (n = 503), **g.** deletion carriers (excluding 15q11.2  
269 del.) (n = 220), **h.** duplications carriers (excluding 16p13.11 dup.) (n = 286), and **i.** non-carriers (n = 152,290). Significant principal components  
270 (PCs) were not plotted for non-carriers visualisation purposes. *Red* =  $\beta < 0$ , *Blue* =  $\beta > 0$ . *Del.* = *deletion*; *Dup.* = *duplication*; *TDI* = *Townsend*  
271 *Deprivation Index*; \* =  $p < 0.05$ , \*\* =  $p < 0.01$ , \*\*\* =  $<0.001$ .

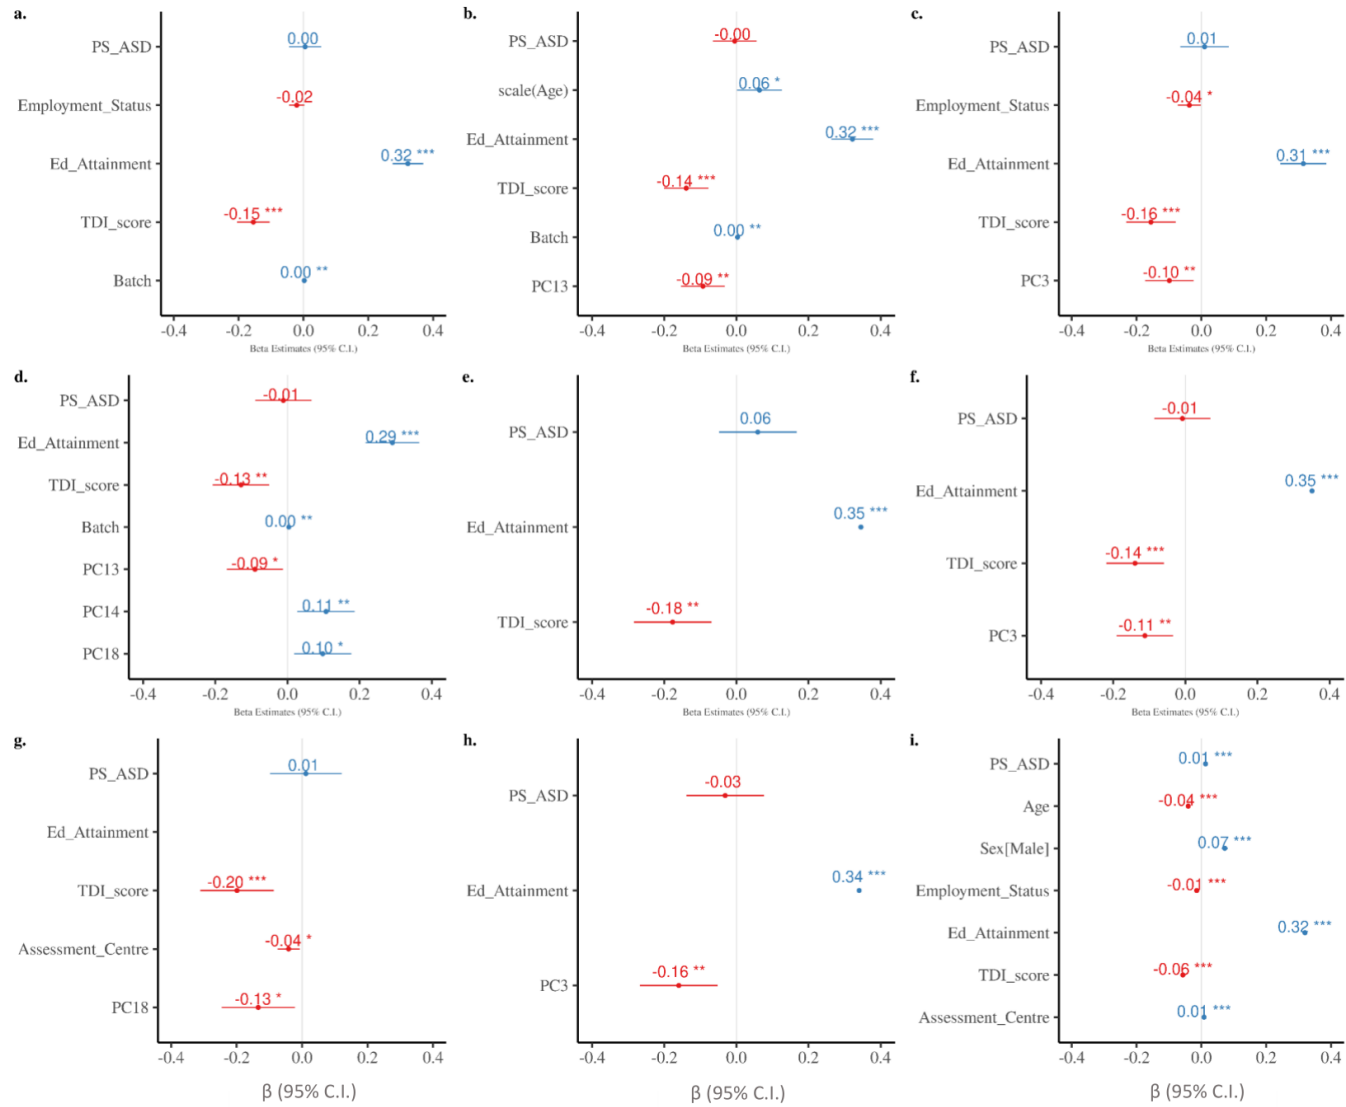

284 **Supplementary Figure 5. Forest plots of linear regression analyses of participant *FI* scores vs Autism PGS.** The plots show the  $\beta$  coefficients  
285 from linear regression analyses (Table 2.) testing the association of participant *FI* with PGS for autism (PS\_ASD) within all **a.** ND-CNV carriers (n  
286 = 1,317), **b.** deletion carriers (n = 763), **c.** duplication carriers (n = 561), **d.** 15q11.2 del. carriers (n = 543), **e.** 16p13.11 dup. carriers (n = 275), **f.**  
287 ND-CNV carriers (excluding 15q11.2 del. and 16p13.11 dup.) (n = 503), **g.** deletion carriers (excluding 15q11.2 del.) (n = 220), **h.** duplications  
288 carriers (excluding 16p13.11 dup.) (n = 286), and **i.** non-carriers (n = 152,290). Significant principal components (PCs) were not plotted for non-  
289 carriers visualisation purposes. *Red* =  $\beta < 0$ , *Blue* =  $\beta > 0$ . *Del.* = *deletion*; *Dup.* = *duplication*; *TDI* = *Townsend Deprivation Index*; \* =  $p < 0.05$ , \*\*  
290 =  $p < 0.01$ , \*\*\* =  $<0.001$ .

291 Supplementary Figure 6.

292

293

294

295

296

297

298

299

300

301

302

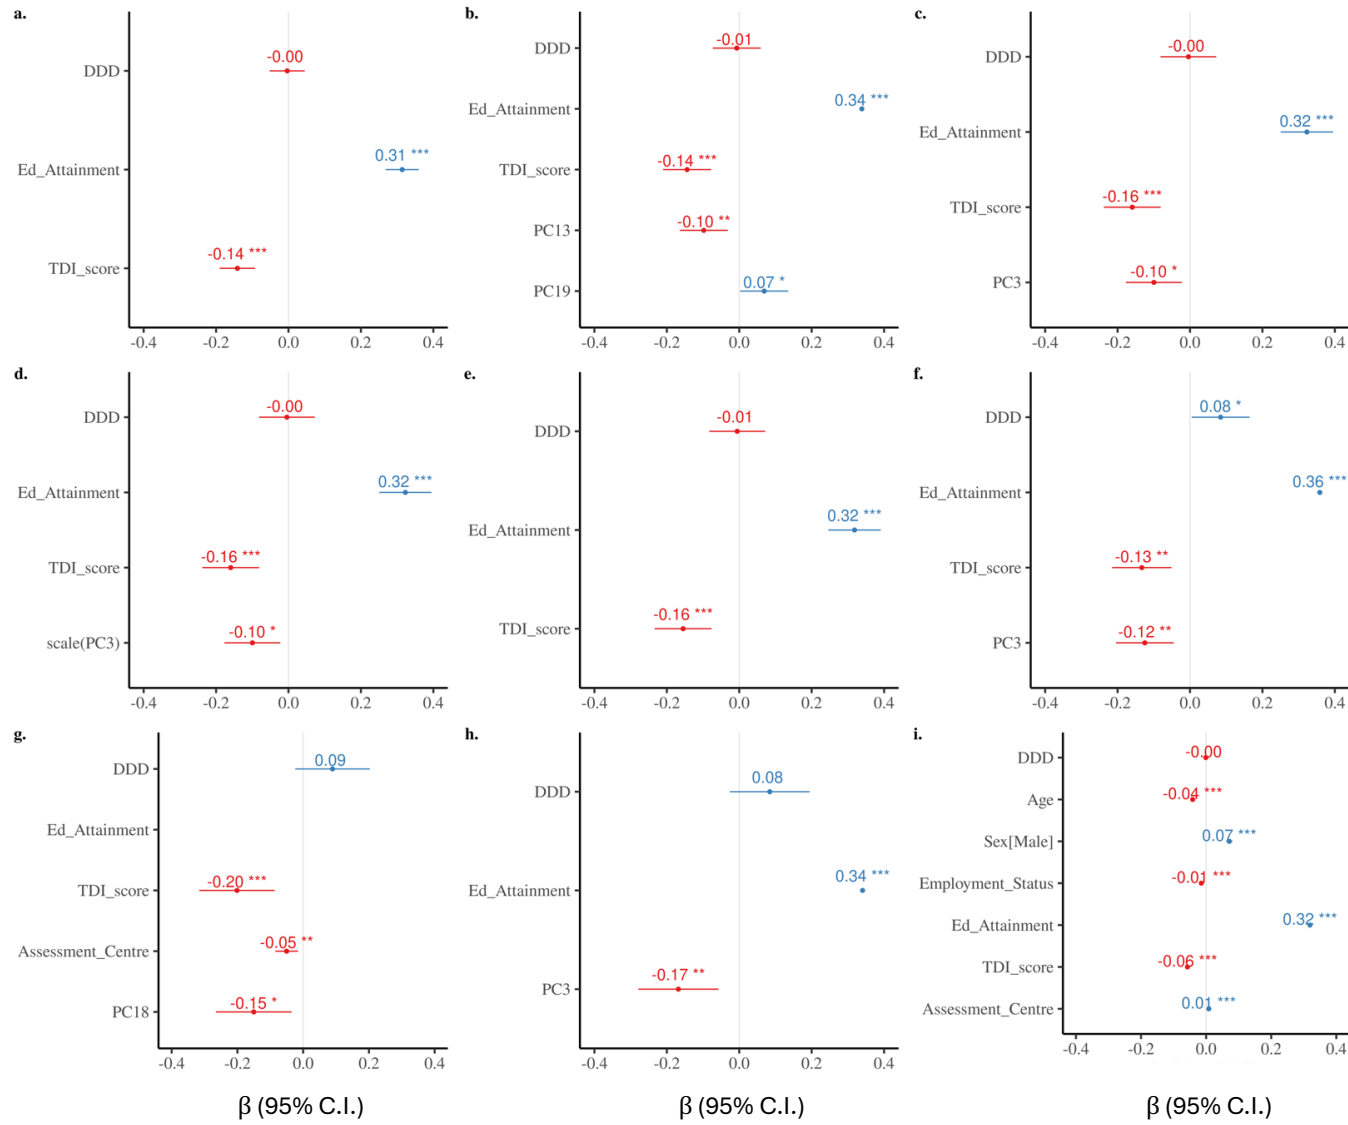

303 **Supplementary Figure 6. Forest plots of linear regression analyses of participant *FI* scores vs DDD variants.** The plots show the  $\beta$  coefficients  
304 from linear regression analyses (Table 2.) testing the association of participant *FI* with normalised counts of DDD variants within all **a.** ND-CNV  
305 carriers (n = 1,274), **b.** deletion carriers (n = 739), **c.** duplication carriers (n = 542), **d.** 15q11.2 del. carriers (n = 523), **e.** 16p13.11 dup. carriers (n  
306 = 267), **f.** ND-CNV carriers (excluding 15q11.2 del. and 16p13.11 dup.) (n = 488), **g.** deletion carriers (excluding 15q11.2 del.) (n = 216), **h.**  
307 duplications carriers (excluding 16p13.11 dup.) (n = 275), and **i.** non-carriers (n = 146,859). Significant principal components (PCs) were not  
308 plotted for non-carriers visualisation purposes. *Red* =  $\beta < 0$ , *Blue* =  $\beta > 0$ . *Del.* = *deletion*; *Dup.* = *duplication*; *TDI* = *Townsend Deprivation Index*;  
309 *DDD* = *Deciphering Developmental Disorders*; \* =  $p < 0.05$ , \*\* =  $p < 0.01$ , \*\*\* =  $<0.001$ .

310 Supplementary Figure 7.

311

312

313

314

315

316

317

318

319

320

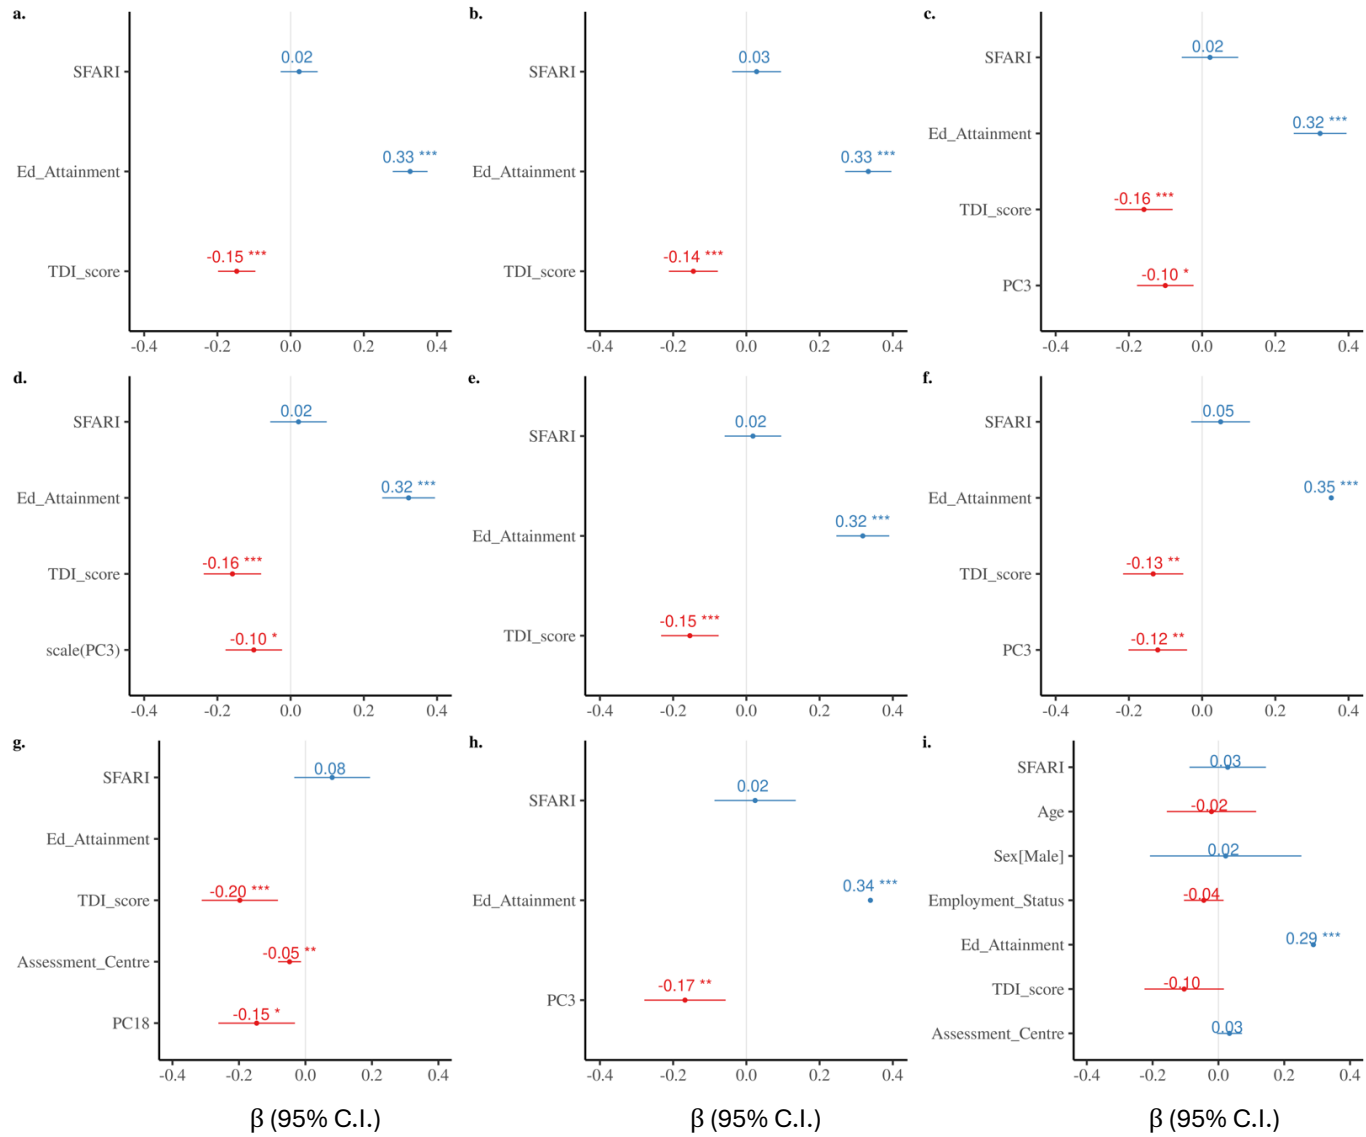

321 **Supplementary Figure 7. Forest plots of linear regression analyses of participant *FI* scores vs SFARI variants.** The plots show the  $\beta$  coefficients  
322 from linear regression analyses (Table 2.) testing the association of participant *FI* with normalised counts of SFARI variants within all **a.** ND-CNV  
323 carriers (n = 1,274), **b.** deletion carriers (n = 739), **c.** duplication carriers (n = 542), **d.** 15q11.2 del. carriers (n = 523), **e.** 16p13.11 dup. carriers (n  
324 = 267), **f.** ND-CNV carriers (excluding 15q11.2 del. and 16p13.11 dup.) (n = 488), **g.** deletion carriers (excluding 15q11.2 del.) (n = 216), **h.**  
325 duplications carriers (excluding 16p13.11 dup.) (n = 275), and **i.** non-carriers (n = 146,859). Significant principal components (PCs) were not  
326 plotted for non-carriers visualisation purposes. *Red* =  $\beta < 0$ , *Blue* =  $\beta > 0$ . *Del.* = *deletion*; *Dup.* = *duplication*; *TDI* = *Townsend Deprivation Index*;  
327 *SFARI* = *Simons Foundation Autism Research Initiative*; \* =  $p < 0.05$ , \*\* =  $p < 0.01$ , \*\*\* =  $<0.001$ .

328 Supplementary Figure 8.

329

330

331

332

333

334

335

336

337

338

339

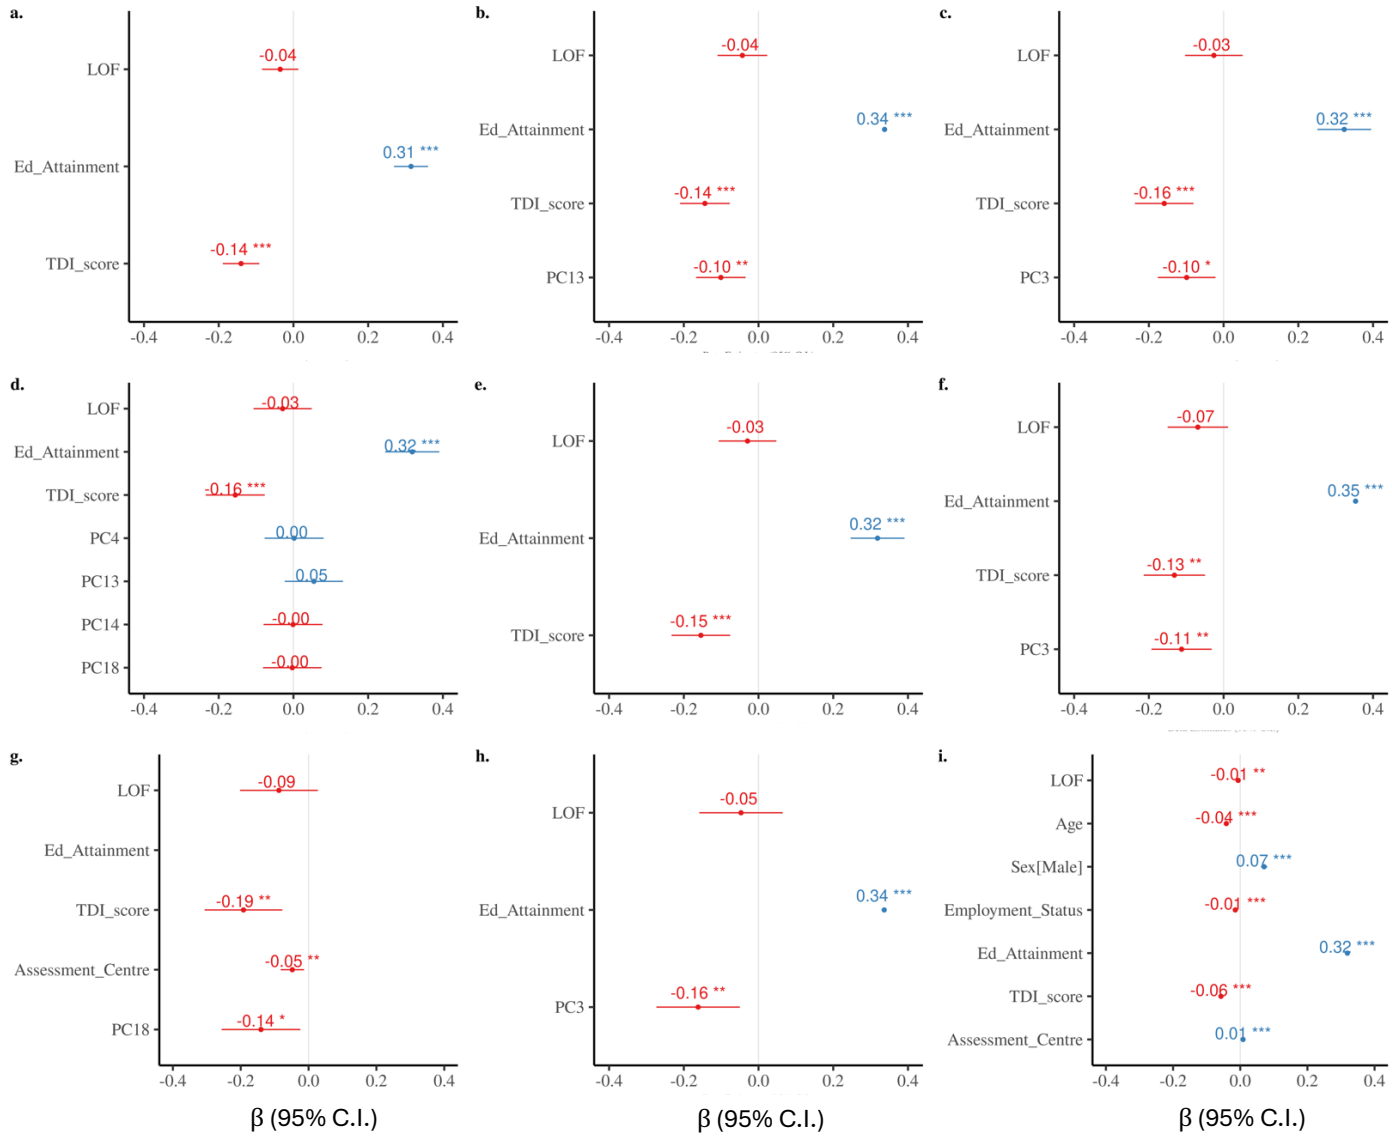



340 **Supplementary Figure 8. Forest plots of linear regression analyses of participant *FI* scores vs LOF variants.** The plots show the  $\beta$  coefficients  
341 from linear regression analyses (Table 2.) testing the association of participant *FI* with normalised counts of LOF variants within all **a.** ND-CNV  
342 carriers (n = 1,274), **b.** deletion carriers (n = 739), **c.** duplication carriers (n = 542), **d.** 15q11.2 del. carriers (n = 523), **e.** 16p13.11 dup. carriers (n  
343 = 267), **f.** ND-CNV carriers (excluding 15q11.2 del. and 16p13.11 dup.) (n = 488), **g.** deletion carriers (excluding 15q11.2 del.) (n = 216), **h.**  
344 duplications carriers (excluding 16p13.11 dup.) (n = 275), and **i.** non-carriers (n = 146,859). Significant principal components (PCs) were not  
345 plotted for non-carriers visualisation purposes. *Red* =  $\beta < 0$ , *Blue* =  $\beta > 0$ . *Del.* = *deletion*; *Dup.* = *duplication*; *TDI* = *Townsend Deprivation Index*;  
346 *LOF* = *Intolerant to loss-of-function brain expressed genes*; \* =  $p < 0.05$ , \*\* =  $p < 0.01$ , \*\*\* =  $< 0.001$ .

347 Supplementary Figure 9.

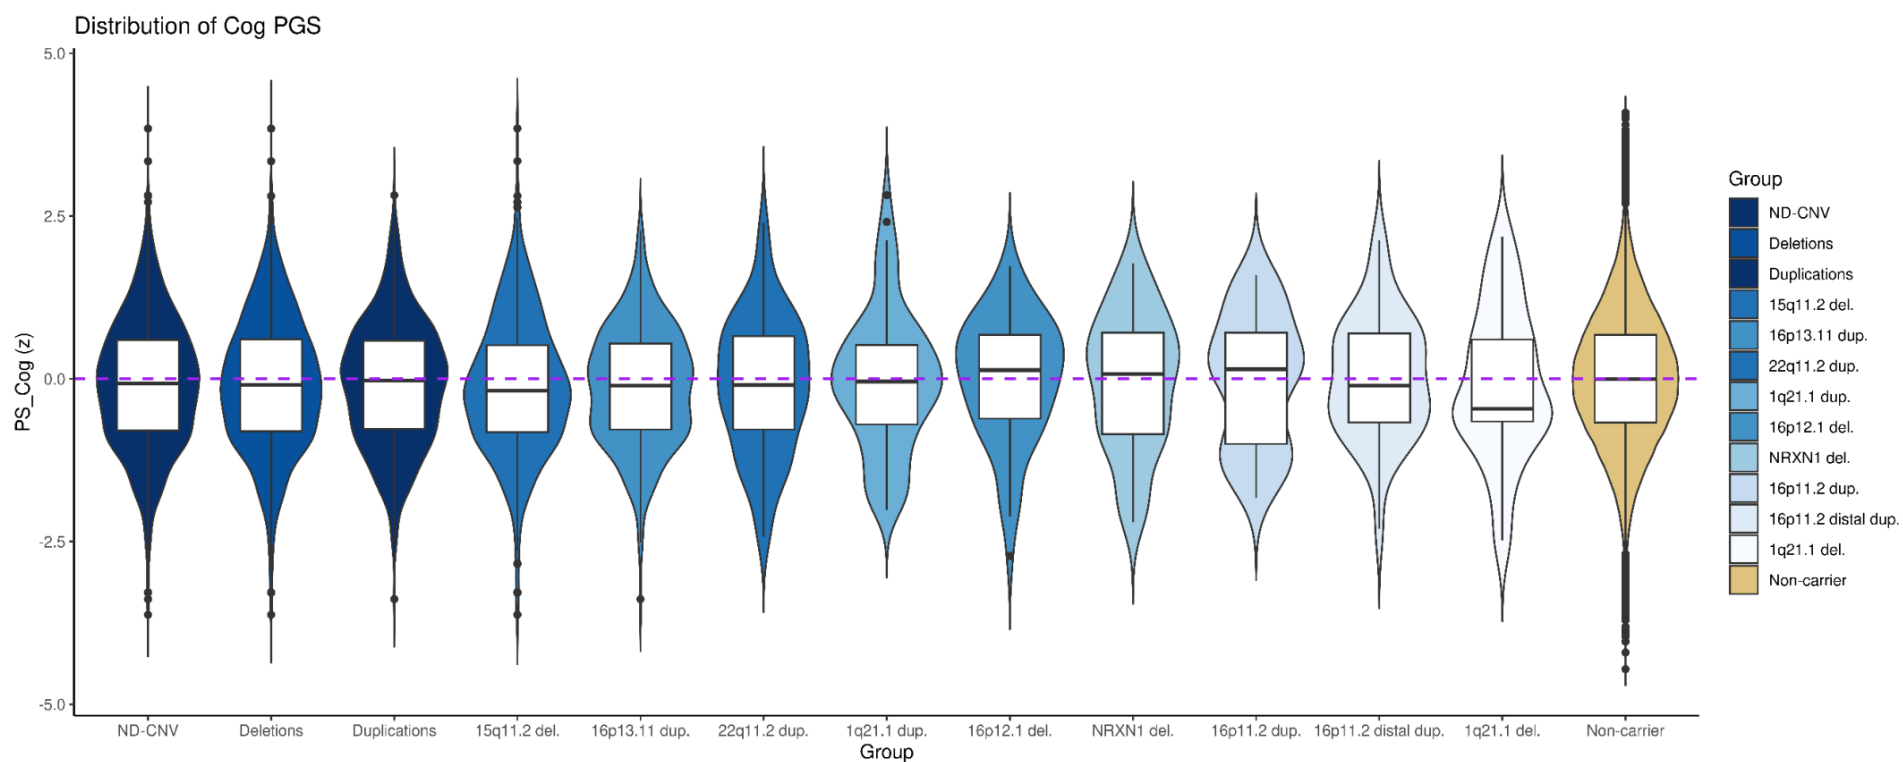

348 **Supplementary Figure 9. Distribution of PS\_Cog across ND-CNV carriers and non-carriers.** Depicted is the distribution (violin plot), interquartile  
 349 range (black bars of violin plot), minimum (bottom of violin plot), maximum (top of violin plot), group mean (black horizontal line of boxplot)  
 350 and cohort mean (purple dashed line) of PS\_Cog across ND-CNV carriers and non-carriers. PS\_Cog was converted to a z-score by normalising to  
 351 the cohort mean. *ND-CNV*  $n = 1,318$ ; *15q11.2 del.*  $n = 543$ ; *16p13.11 dup.*  $n = 275$ ; *22q11.2 dup.*  $n = 83$ ; *1q21.1 dup.*  $n = 73$ ; *16p12.1 del.*  $n = 64$ ;  
 352 *NRXN1 del.*  $n = 56$ ; *16p11.2 dup.*  $n = 46$ ; *16p11.2 distal dup.*  $n = 38$ ; *1q21.1 del.*  $n = 35$ ; *non-carriers* = 152,325. PS\_Cog = cognition polygenic score.

353 Supplementary Figure 10.

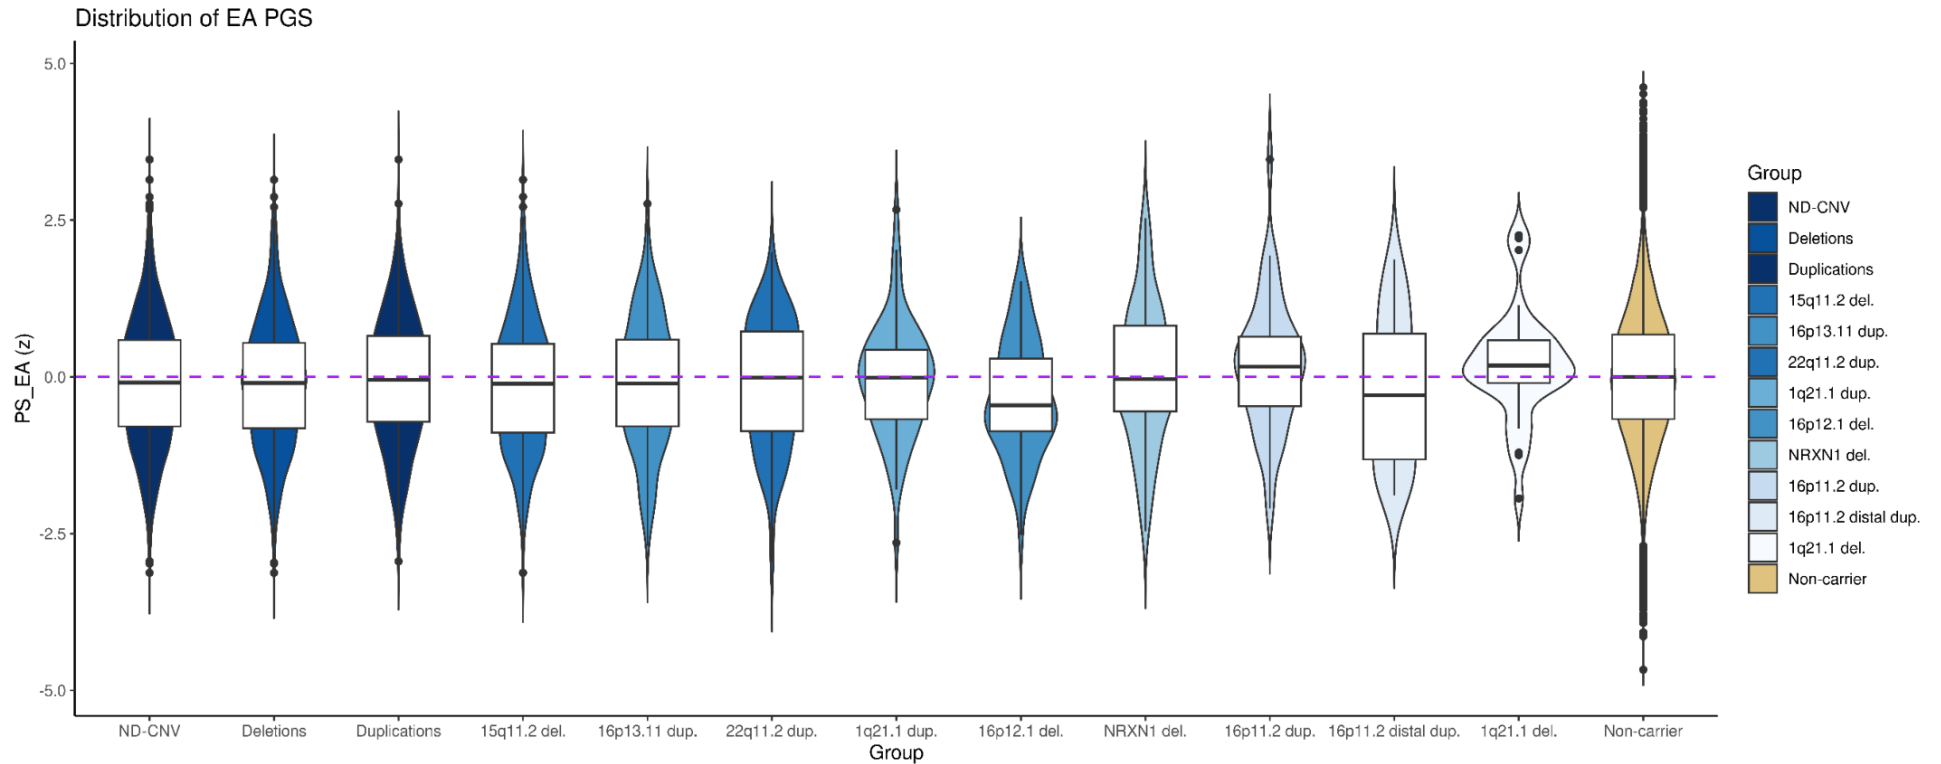

354 **Supplementary Figure 10. Distribution of PS\_EA across ND-CNV carriers and non-carriers.** Depicted is the distribution (violin plot), interquartile  
355 range (black bars of violin plot), minimum (bottom of violin plot), maximum (top of violin plot), group mean (black horizontal line of boxplot)  
356 and cohort mean (purple dashed line) of PS\_EA across ND-CNV carriers and non-carriers. PS\_Cog was converted to a z-score by normalising to  
357 the cohort mean. *ND-CNV*  $n = 1,318$ ; *15q11.2 del.*  $n = 543$ ; *16p13.11 dup.*  $n = 275$ ; *22q11.2 dup.*  $n = 83$ ; *1q21.1 dup.*  $n = 73$ ; *16p12.1 del.*  $n = 64$ ;

358 *NRXN1 del. n = 56; 16p11.2 dup. n = 46; 16p11.2 distal dup. n = 38; 1q21.1 del. n = 35; non-carriers = 152,325. PS\_EA = educational attainment*  
359 *polygenic score.*

360 Supplementary Figure 11.

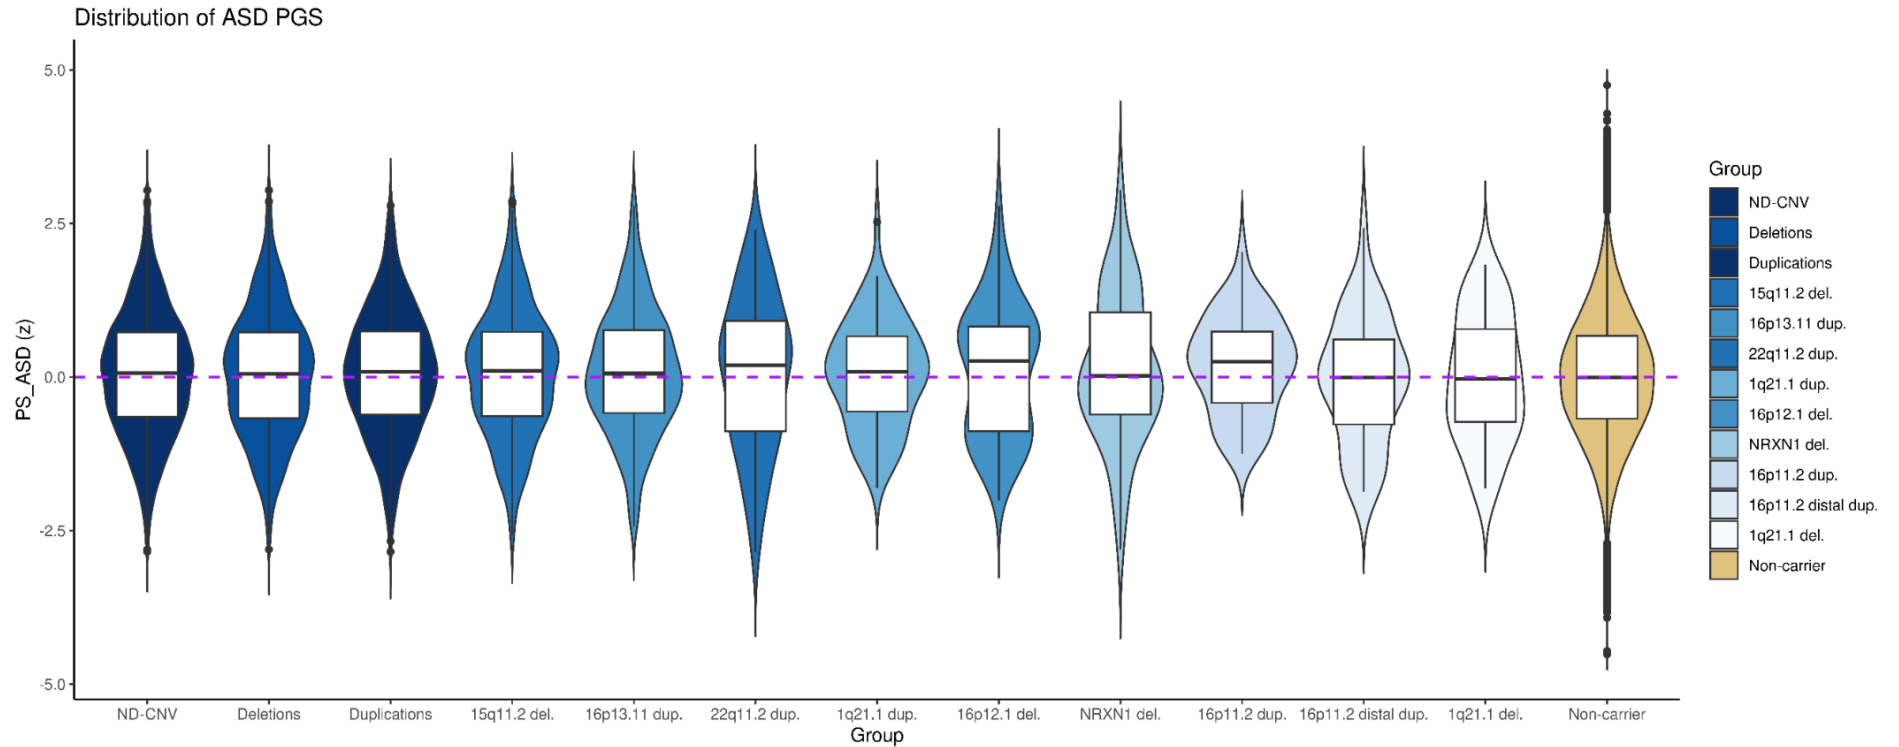

361 **Supplementary Figure 11. Distribution of PS\_ASF across ND-CNV carriers and non-carriers.** Depicted is the distribution (violin plot),  
362 interquartile range (black bars of violin plot), minimum (bottom of violin plot), maximum (top of violin plot), group mean (black horizontal line  
363 of boxplot) and cohort mean (purple dashed line) of PS\_ASF across ND-CNV carriers and non-carriers. PS\_ASF was converted to a z-score by  
364 normalising to the cohort mean. *ND-CNV*  $n = 1,318$ ; *15q11.2 del.*  $n = 543$ ; *16p13.11 dup.*  $n = 275$ ; *22q11.2 dup.*  $n = 83$ ; *1q21.1 dup.*  $n = 73$ ; *16p12.1*

365 *del. n = 64; NRXN1 del. n = 56; 16p11.2 dup. n = 46; 16p11.2 distal dup. n = 38; 1q21.1 del. n = 35; non-carriers = 152,325. PS\_ASD = autism*  
366 *polygenic score.*

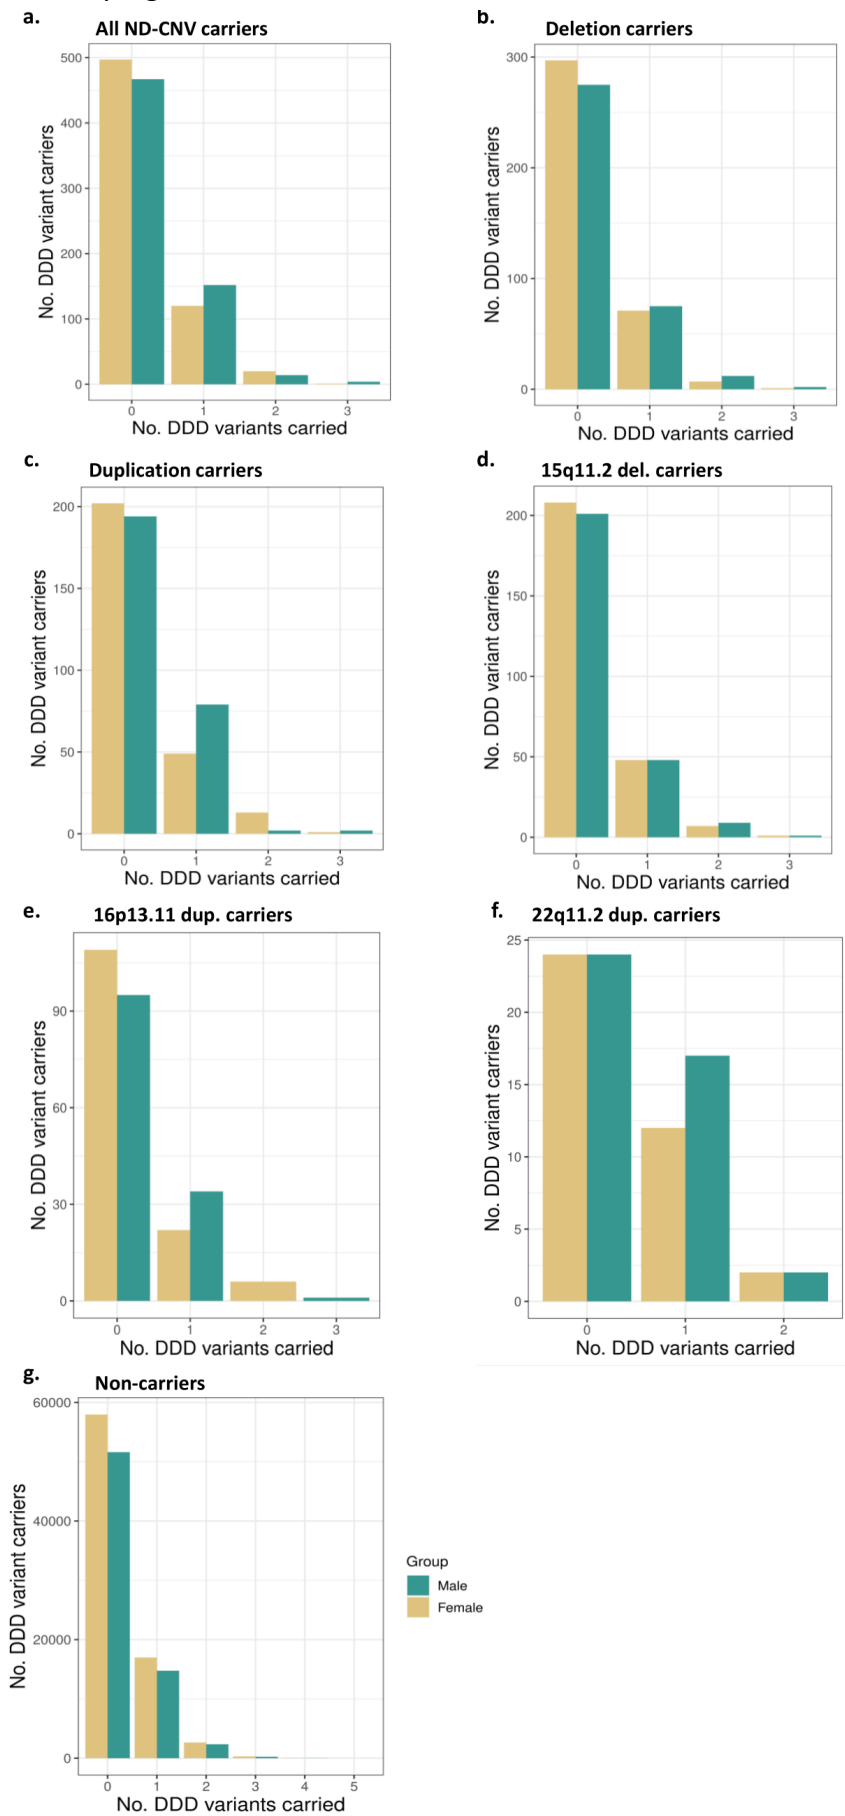

368 **Supplementary Figure 12. Distribution of DDD rare variants in ND-CNV carriers and non-**  
369 **carriers.** Here is shown the distribution of deleterious DDD rare variants in ND-CNV carriers  
370 and non-carriers. The plots show the number of DDD variants (x-axis) vs the number of DDD  
371 variant carriers (y-axis) for **a.** ND-CNV carriers ( $n = 1,275$ ), **b.** deletion carriers ( $n = 740$ ), **c.**  
372 duplication carriers ( $n = 542$ ), **d.** 15q11.2 del. carriers ( $n = 523$ ), **e.** 16p13.11 dup. carriers ( $n =$   
373 267), **f.** 22q11.2 dup. ( $n = 81$ ), **g.** non-carriers ( $n = 146,894$ ). *DDD = Deciphering Developmental*  
374 *Disorders.*

375



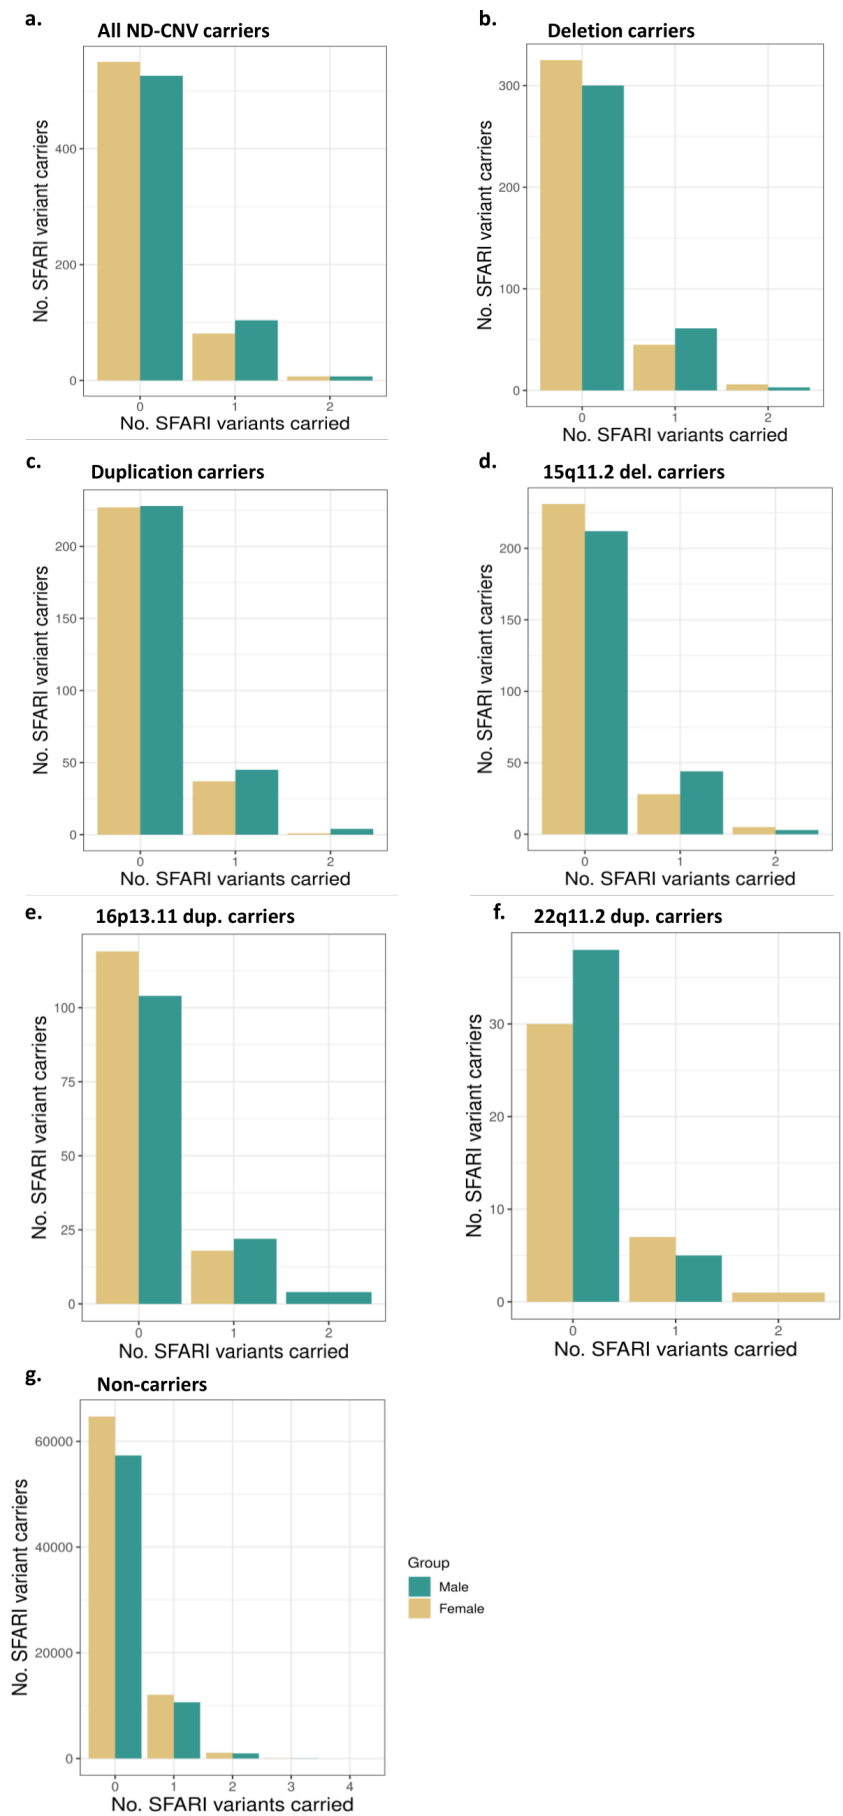

377 **Supplementary Figure 13. Distribution of SFARI rare variants in ND-CNV carriers and non-**  
378 **carriers.** Here is shown the distribution of deleterious SFARI rare variants in ND-CNV carriers  
379 and non-carriers. The plots show the number of SFARI variants (x-axis) vs the number of SFARI  
380 variant carriers (y-axis) for **a.** ND-CNV carriers ( $n = 1,275$ ), **b.** deletion carriers ( $n = 740$ ), **c.**  
381 duplication carriers ( $n = 542$ ), **d.** 15q11.2 del. carriers ( $n = 523$ ), **e.** 16p13.11 dup. carriers ( $n =$   
382 267), **f.** 22q11.2 dup. ( $n = 81$ ), **g.** non-carriers ( $n = 146,894$ ). *SFARI = Simons Foundation Autism*  
383 *Research Initiative.*

384

385 Supplementary Figure 14.

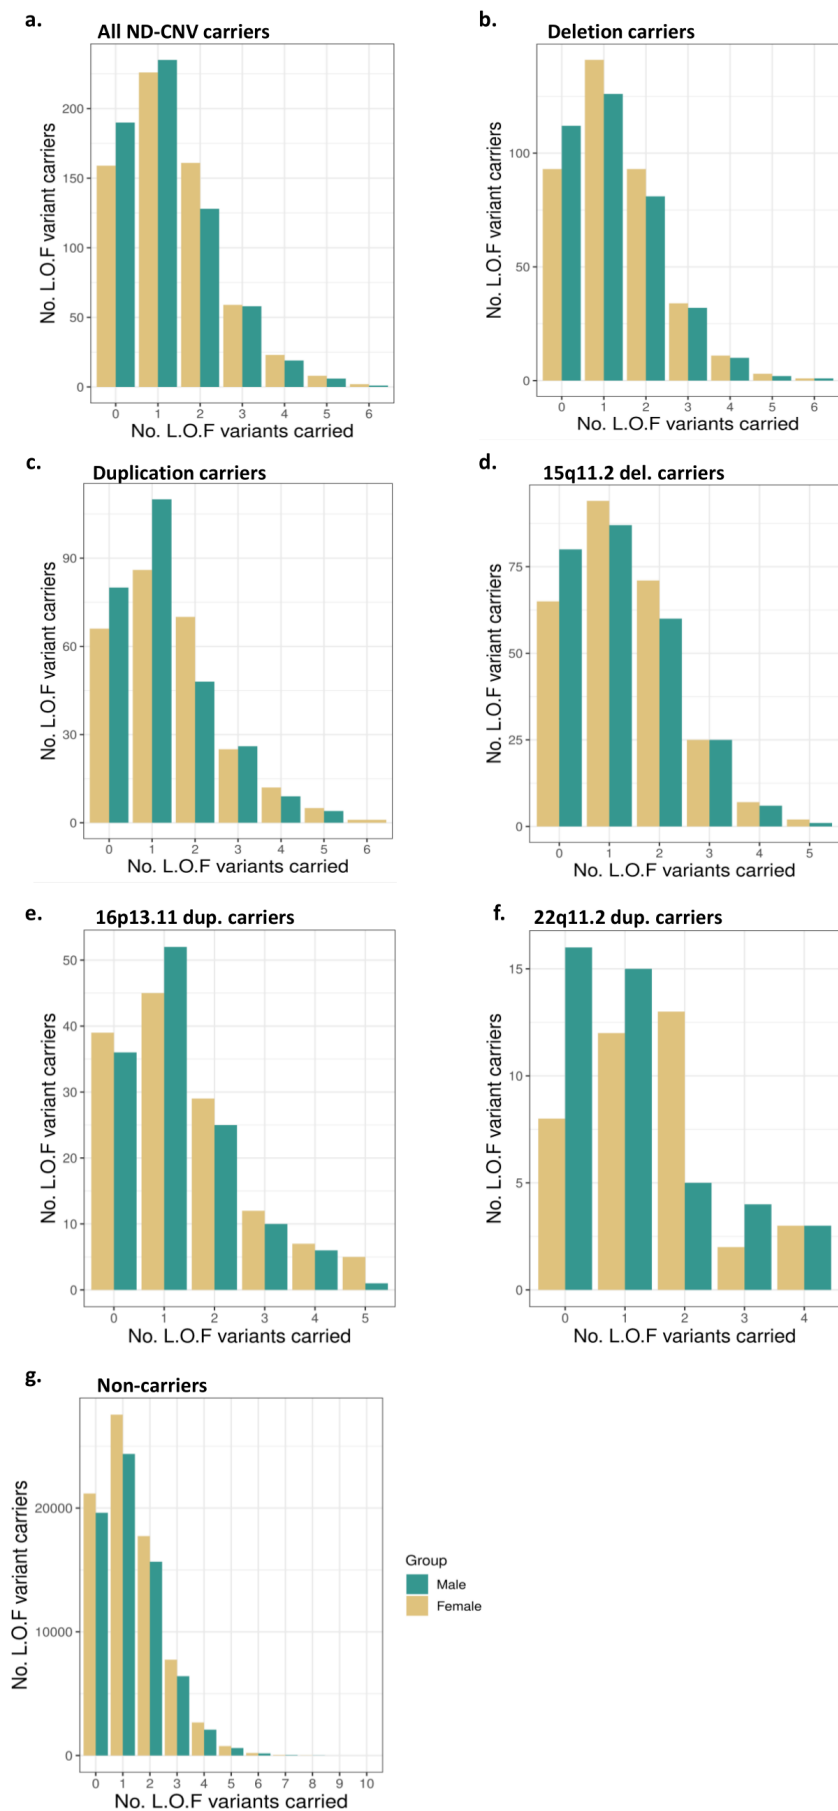

386 **Supplementary Figure 14. Distribution of LOF rare variants across SFARI, DDD and L.O.F**  
387 **gene-sets in ND-CNV carriers and non-carriers.** Here is shown the distribution of deleterious  
388 LOF rare variants in ND-CNV carriers and non-carriers. The plots show the number of LOF  
389 variants (x-axis) vs the number of LOF variant carriers (y-axis) for **a.** ND-CNV carriers ( $n =$   
390 1,275), **b.** deletion carriers ( $n = 740$ ), **c.** duplication carriers ( $n = 542$ ), **d.** 15q11.2 del. carriers  
391 ( $n = 523$ ), **e.** 16p13.11 dup. carriers ( $n = 267$ ), **f.** 22q11.2 dup. ( $n = 81$ ), **g.** non-carriers ( $n =$   
392 146,894). *LOF = Intolerant to loss-of-function brain-expressed genes.*

393

394

395

396

397

398

399

400

401

402

403

404

405

406 Supplementary Figure. 15

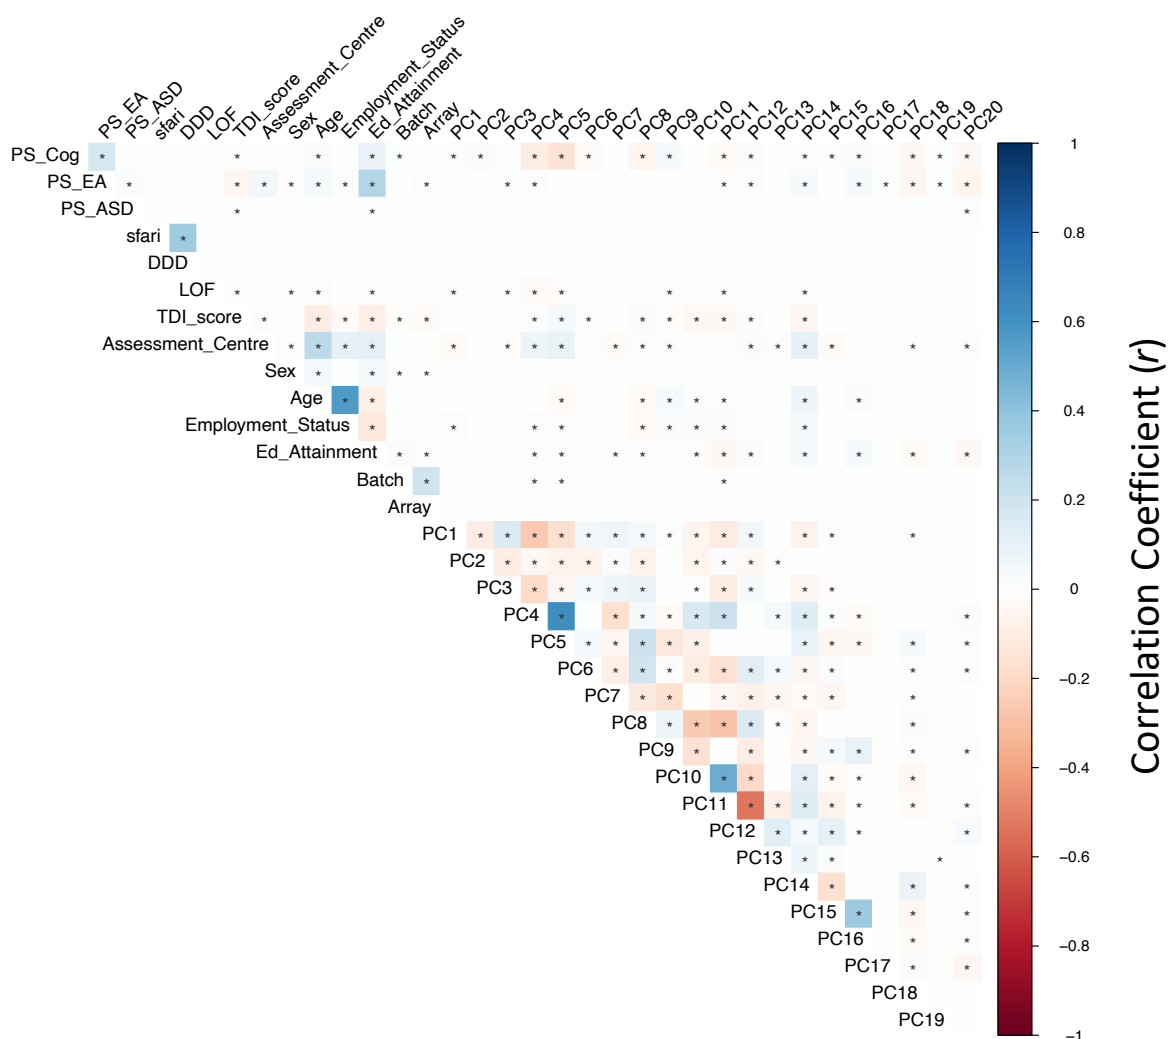

407 **Supplementary Figure 15. Correlation plot of predictor in linear regression analyses.**

408 Displayed is a correlation matrix of all predictors considered for linear regression analyses. No  
 409 strong correlation was observed between any pair of predictors ( $r > 0.7$ ). Bonferroni  
 410 correction was applied to all tests ( $p = 0.0001$ ). This figure was generated using the *corrplot*  
 411 package in R. \* =  $p < 0.0001$ . *PS\_Cog* = cognition polygenic score; *PS\_EA* = educational  
 412 attainment polygenic score; *PS\_ASD* = autism polygenic score; *TDI\_score* = townsend  
 413 deprivation index score; *sfari* = autism associated rare variants; *DDD* = intellectual  
 414 disability/developmental delay associated rare variants; *LOF* = intolerant to loss-of-function,  
 415 *brain expressed rare variants*; *PC* = principal component.

416 **5. References**

- 417 1. Kendall, K. M. *et al.* Cognitive Performance Among Carriers of Pathogenic Copy Number  
418 Variants: Analysis of 152,000 UK Biobank Subjects. *Biol Psychiatry* **82**, 103–110 (2017).
- 419 2. Kendall, K. M. *et al.* Cognitive performance and functional outcomes of carriers of pathogenic  
420 copy number variants: Analysis of the UK Biobank. *Br J Psychiatry* **214**, 297–304 (2019).
- 421 3. Fawns-Ritchie, C. & Deary, I. J. Reliability and validity of the UK Biobank cognitive tests. *PLoS*  
422 *One* **15**, e0231627 (2020).
- 423 4. Townsend, P., Phillimore, P. & Beattie, A. *Health and Deprivation: Inequality and the North*  
424 (Croom Helm, 1988).
- 425 5. Battaglia, A. *et al.* Further delineation of deletion 1p36 syndrome in 60 patients: a recognizable  
426 phenotype and common cause of developmental delay and mental retardation. *Pediatrics* **121**,  
427 404–410 (2008).
- 428 6. El Waly, B. *et al.* Molecular characterization of a 1p36 chromosomal duplication and in utero  
429 interference define ENO1 as a candidate gene for polymicrogyria. *Eur J Hum Genet* **28**, 1703-  
430 1713 (2020).
- 431 7. Linden, S. C. *et al.* The psychiatric phenotypes of 1q21 distal deletion and duplication. *Transl*  
432 *Psychiatry* **11**, 1–10 (2021).
- 433 8. Cosemans, N. *et al.* The clinical relevance of intragenic NRXN1 deletions. *J Med Genet* **57**, 347-  
434 355 (2020).
- 435 9. Dabell, M. P. *et al.* Investigation of NRXN1 deletions: Clinical and molecular characterization.  
436 *Am J Med Genet A* **161**, 717–731 (2013).
- 437 10. Almuzzaini, B. *et al.* A novel interstitial deletion of chromosome 2q21.1-q23.3: Case report and  
438 literature review. *Mol Genet Genomic Med* **8**, e1135 (2020).
- 439 11. Gavrill, E. C. *et al.* Genotype-Phenotype Correlations in 2q37-Deletion Syndrome: An Update of  
440 the Clinical Spectrum and Literature Review. *Genes* **14**, 465 (2023).
- 441 12. Sanchez Russo, R. *et al.* Deep phenotyping in 3q29 deletion syndrome: recommendations for  
442 clinical care. *Genet Med* **23**, 872–880 (2021).
- 443 13. Battaglia, A., Carey, J. C. & South, S. T. Wolf-Hirschhorn syndrome: A review and update. *Am J*  
444 *Med Genet C Semin Med Genet* **169**, 216–223 (2015).
- 445 14. Hannes, F. *et al.* Duplication of the Wolf-Hirschhorn syndrome critical region causes  
446 neurodevelopmental delay. *Eur J Med Genet* **53**, 136–140 (2010).
- 447 15. Tatton-Brown, K. *et al.* Multiple mechanisms are implicated in the generation of 5q35  
448 microdeletions in Sotos syndrome. *J Med Genet* **42**, 307–313 (2005).
- 449 16. Merla, G. *et al.* Copy number variants at Williams–Beuren syndrome 7q11.23 region. *Hum*  
450 *Genet* **128**, 3–26 (2010).
- 451 17. Ballarati, L. *et al.* Genotype–phenotype correlations in a new case of 8p23.1 deletion and  
452 review of the literature. *Eur J Med Genet* **54**, 55–59 (2011).

- 453 18. Barber, J. C. K. *et al.* 8p23.1 duplication syndrome; a novel genomic condition with unexpected  
454 complexity revealed by array CGH. *Eur J Hum Genet* **16**, 18–27 (2007).
- 455 19. Kleefstra, T. *et al.* Loss-of-Function Mutations in Euchromatin Histone Methyl Transferase 1  
456 (EHMT1) Cause the 9q34 subtelomeric Deletion Syndrome. *Am J Hum Genet* **79**, 370–377  
457 (2006).
- 458 20. Pavone, P. *et al.* Case Report: A mild phenotype associated with a de novo microdeletion  
459 10q23.1-q23.2: a new patient with a novel feature. *BMJ Case Rep* (2016), doi:10.1136/bcr-  
460 2016-214388.
- 461 21. Swarr, D. T. *et al.* Potocki–Shaffer syndrome: Comprehensive clinical assessment, review of the  
462 literature, and proposals for medical management. *Am J Med Genet A* **152A**, 565–572 (2010).
- 463 22. Jønch, A. E. *et al.* Estimating the effect size of the 15Q11.2 BP1–BP2 deletion and its  
464 contribution to neurodevelopmental symptoms: recommendations for practice. *J Med Genet*  
465 **56**, 701–710 (2019).
- 466 23. Kalsner, L. & Chamberlain, S. J. Prader-Willi, Angelman, and 15q11-q13 duplication syndromes.  
467 *Pediatr Clin North Am* **62**, 587–606 (2015).
- 468 24. Miller, D. T. *et al.* Microdeletion/duplication at 15q13.2q13.3 among individuals with features  
469 of autism and other neuropsychiatric disorders. *J Med Genet* **46**, 242–248 (2009).
- 470 25. El-Hattab, A. W. *et al.* Redefined genomic architecture in 15q24 directed by patient deletion/  
471 duplication breakpoint mapping. *Hum Genet* **126**, 589–602 (2009).
- 472 26. Palumbo, O. *et al.* An emerging phenotype of interstitial 15q25.2 microdeletions: clinical report  
473 and review. *Am J Med Genet A* **158A**, 3182–3189 (2012).
- 474 27. Heinzen, E. L. *et al.* Rare Deletions at 16p13.11 Predispose to a Diverse Spectrum of Sporadic  
475 Epilepsy Syndromes. *Am J Hum Genet* **86**, 707–718 (2010).
- 476 28. Ramalingam, A. *et al.* 16p13.11 duplication is a risk factor for a wide spectrum of  
477 neuropsychiatric disorders. *J Hum Genet* **56**, 541–544 (2011).
- 478 29. Girirajan, S. *et al.* A recurrent 16p12.1 microdeletion supports a two-hit model for severe  
479 developmental delay. *Nat Genet* **42**, 203–209 (2010).
- 480 30. Tabet, A. C. *et al.* Autism multiplex family with 16p11.2p12.2 microduplication syndrome in  
481 monozygotic twins and distal 16p11.2 deletion in their brother. *Eur J Hum Genet* **20**, 540–546  
482 (2012).
- 483 31. D’Angelo, D. *et al.* Defining the effect of the 16p11.2 duplication on cognition, behavior, and  
484 medical comorbidities. *JAMA Psychiatry* **73**, 20–30 (2016).
- 485 32. Emrick, L. T. *et al.* Microdeletions excluding YWHAE and PAFAH1B1 cause a unique  
486 leukoencephalopathy: further delineation of the 17p13.3 microdeletion spectrum. *Genet Med*  
487 **21**, 1652–1656 (2018).
- 488 33. Capra, V. *et al.* Identification of a rare 17p13.3 duplication including the BHLHA9 and YWHAE  
489 genes in a family with developmental delay and behavioural problems. *BMC Med Genet* **13**, 1-  
490 7 (2012).

- 491 34. Juyal, R. C. *et al.* Molecular analyses of 17p11.2 deletions in 62 Smith-Magenis syndrome  
492 patients. *Am J Hum Genet* **58**, 998 (1996).
- 493 35. Potocki, L. *et al.* Molecular mechanism for duplication 17p11.2— the homologous  
494 recombination reciprocal of the Smith-Magenis microdeletion. *Nat Genet* **24**, 84–87 (2000).
- 495 36. Wegscheid, M. L. *et al.* Patient-derived iPSC-cerebral organoid modeling of the 17q11.2  
496 microdeletion syndrome establishes CRLF3 as a critical regulator of neurogenesis. *Cell Rep* **36**,  
497 109315 (2021).
- 498 37. Moles, K. J. *et al.* NF1 microduplications: identification of seven nonrelated individuals provides  
499 further characterization of the phenotype. *Genet Med* **14**, 508–514 (2012).
- 500 38. Rasmussen, M. *et al.* 17q12 deletion and duplication syndrome in Denmark—A clinical cohort  
501 of 38 patients and review of the literature. *Am J Med Genet A* **170**, 2934–2942 (2016).
- 502 39. Koolen, D. A. *et al.* The Koolen-de Vries syndrome: a phenotypic comparison of patients with a  
503 17q21.31 microdeletion versus a KANSL1 sequence variant. *Eur J Hum Genet* **24**, 652–659  
504 (2015).
- 505 40. Fiksinski, A. M. *et al.* Neurodevelopmental Trajectories and Psychiatric Morbidity: Lessons  
506 Learned From the 22q11.2 Deletion Syndrome. *Curr Psychiatry Rep* **23**, 1-11 (2021).
- 507 41. Niarchou, M. *et al.* The clinical presentation of attention deficit-hyperactivity disorder (ADHD)  
508 in children with 22q11.2 deletion syndrome. *Am J Med Genet B* **168**, 730–738 (2015).
- 509 42. Wentzel, C. *et al.* Clinical variability of the 22q11.2 duplication syndrome. *Eur J Med Genet* **51**,  
510 501–510 (2008).
- 511 43. Ben-Shachar, S. *et al.* 22q11.2 distal deletion: a recurrent genomic disorder distinct from  
512 DiGeorge syndrome and velocardiofacial syndrome. *Am J Hum Genet* **82**, 214–221 (2008).
- 513 44. Pinchefsky, E., Laneuville, L. & Srour, M. Distal 22q11.2 Microduplication: Case Report and  
514 Review of the Literature. *Child Neurol Open* **4**, 2329048X1773765 (2017).
- 515 45. Poot, M. SHANK Mutations May Disorder Brain Development. *Mol Syndromol* **6**, 1 (2015).
- 516 46. Kendall, K. M. *et al.* Association of Rare Copy Number Variants with Risk of Depression. *JAMA*  
517 *Psychiatry* **76**, 818–825 (2019).
- 518 47. Kirov, G. *et al.* The penetrance of copy number variations for schizophrenia and developmental  
519 delay. *Biol Psychiatry* **75**, 378–385 (2014).
- 520 48. Rosenfeld, J. A. *et al.* Estimates of penetrance for recurrent pathogenic copy-number  
521 variations. *Genet Med* **15**, 478–481 (2013).
- 522 49. Choi, S. W. & O'Reilly, P. F. PRSice-2: Polygenic Risk Score software for biobank-scale data.  
523 *GigaScience* **8**, giz082 (2019).
- 524
